# Supplementary material for: Heliophyllite: a discredited mineral species identical to ecdemite
Source: Copernicus journal article supplement (doi:10.5194/ejm-32-265-2020), 2020-04-02
Supplement: Supplementary file 1 [file ejm-32-265-2020-supplement.zip]

Archive with 2 entries (2 files):
- ejm-32-265-2020-supplement-title-page.pdf
- Heliophyllite.cif
