# Supplementary material for: Heliophyllite: a discredited mineral species identical to ecdemite
Source: Copernicus journal article supplement (doi:10.5194/ejm-32-265-2020), 2020-04-02
Supplement: Supplementary file 1 [file ejm-32-265-2020-supplement.zip › ejm-32-265-2020-supplement-title-page.pdf]

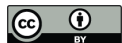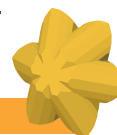

## *Supplement of*

# **Heliophyllite: a discredited mineral species identical to ecdemite**

**Natale Perchiazzi et al.**

*Correspondence to:* Natale Perchiazzi ([natale.perchiazzi@unipi.it](mailto:natale.perchiazzi@unipi.it))

- [ejm-32-265-2020-supplement-title-page.pdf](#)
- [Heliophyllite.cif](#)

The copyright of individual parts of the supplement might differ from the CC BY 4.0 License.
