# Supplementary material for: Heliophyllite: a discredited mineral species identical to ecdemite
Source: Copernicus journal article supplement (doi:10.5194/ejm-32-265-2020), 2020-04-02
Supplement: Supplementary file 1 [file ejm-32-265-2020-supplement.zip › Heliophyllite.cif]

 
data_shelx
 
_audit_creation_method            'SHELXL-2018/3'
_shelx_SHELXL_version_number      '2018/3'
_chemical_name_systematic         ?
_chemical_name_common             ?
_chemical_melting_point           ?
_chemical_formula_moiety          ?
_chemical_formula_sum
 'As2 Cl4 O7 Pb6 Sb0.50' 
_chemical_formula_weight          1707.66

loop_
 _atom_type_symbol
 _atom_type_description
 _atom_type_scat_dispersion_real
 _atom_type_scat_dispersion_imag
 _atom_type_scat_source
 'As'  'As'   0.0499   2.0058
 'International Tables Vol C Tables 4.2.6.8 and 6.1.1.4'
 'Cl'  'Cl'   0.1484   0.1585
 'International Tables Vol C Tables 4.2.6.8 and 6.1.1.4'
 'O'  'O'   0.0106   0.0060
 'International Tables Vol C Tables 4.2.6.8 and 6.1.1.4'
 'Pb'  'Pb'  -3.3944  10.1111
 'International Tables Vol C Tables 4.2.6.8 and 6.1.1.4'
 'Sb'  'Sb'  -0.5866   1.5461
 'International Tables Vol C Tables 4.2.6.8 and 6.1.1.4'
 
_space_group_crystal_system       monoclinic
_space_group_IT_number            4
_space_group_name_H-M_alt         'P 21'
_space_group_name_Hall            'P 2yb'
 
_shelx_space_group_comment
;
The symmetry employed for this shelxl refinement is uniquely defined
by the following loop, which should always be used as a source of
symmetry information in preference to the above space-group names.
They are only intended as comments.
;
 
loop_
 _space_group_symop_operation_xyz
 'x, y, z'
 '-x, y+1/2, -z'
 
_cell_length_a                    10.838(2)
_cell_length_b                    10.8396(16)
_cell_length_c                    6.9809(12)
_cell_angle_alpha                 90
_cell_angle_beta                  113.279(12)
_cell_angle_gamma                 90
_cell_volume                      753.4(2)
_cell_formula_units_Z             2
_cell_measurement_temperature     293(2)
_cell_measurement_reflns_used     ?
_cell_measurement_theta_min       ?
_cell_measurement_theta_max       ?
 
_exptl_crystal_description        ?
_exptl_crystal_colour             ?
_exptl_crystal_density_meas       ?
_exptl_crystal_density_method     ?
_exptl_crystal_density_diffrn     7.528          
_exptl_crystal_F_000              1415
_exptl_transmission_factor_min    ?
_exptl_transmission_factor_max    ?
_exptl_crystal_size_max           ?
_exptl_crystal_size_mid           ?
_exptl_crystal_size_min           ?
_exptl_absorpt_coefficient_mu     72.764
_shelx_estimated_absorpt_T_min    ?
_shelx_estimated_absorpt_T_max    ?
_exptl_absorpt_correction_type    ?
_exptl_absorpt_correction_T_min   ?
_exptl_absorpt_correction_T_max   ?
_exptl_absorpt_process_details    ?
_exptl_absorpt_special_details    ?
_diffrn_ambient_temperature       293(2)
_diffrn_radiation_wavelength      0.71073
_diffrn_radiation_type            MoK\a
_diffrn_source                    ?
_diffrn_measurement_device_type   ?
_diffrn_measurement_method        ?
_diffrn_detector_area_resol_mean  ?
_diffrn_reflns_number             6632
_diffrn_reflns_av_unetI/netI      0.0986
_diffrn_reflns_av_R_equivalents   0.0441
_diffrn_reflns_limit_h_min        -14
_diffrn_reflns_limit_h_max        15
_diffrn_reflns_limit_k_min        -16
_diffrn_reflns_limit_k_max        16
_diffrn_reflns_limit_l_min        -10
_diffrn_reflns_limit_l_max        10
_diffrn_reflns_theta_min          2.046
_diffrn_reflns_theta_max          32.756
_diffrn_reflns_theta_full         25.242
_diffrn_measured_fraction_theta_max   0.894
_diffrn_measured_fraction_theta_full  0.985
_diffrn_reflns_Laue_measured_fraction_max    0.894
_diffrn_reflns_Laue_measured_fraction_full   0.985
_diffrn_reflns_point_group_measured_fraction_max   0.829
_diffrn_reflns_point_group_measured_fraction_full  0.956
_reflns_number_total              4635
_reflns_number_gt                 3435
_reflns_threshold_expression      'I > 2\s(I)'
_reflns_Friedel_coverage          0.775
_reflns_Friedel_fraction_max      0.759
_reflns_Friedel_fraction_full     0.923
 
_reflns_special_details
;
 Reflections were merged by SHELXL according to the crystal
 class for the calculation of statistics and refinement.
 
 _reflns_Friedel_fraction is defined as the number of unique
 Friedel pairs measured divided by the number that would be
 possible theoretically, ignoring centric projections and
 systematic absences.
;
 
_computing_data_collection        ?
_computing_cell_refinement        ?
_computing_data_reduction         ?
_computing_structure_solution     ?
_computing_structure_refinement 'SHELXL-2018/3 (Sheldrick, 2018)'
_computing_molecular_graphics     ?
_computing_publication_material   ?
_refine_special_details           ?
_refine_ls_structure_factor_coef  Fsqd
_refine_ls_matrix_type            full
_refine_ls_weighting_scheme       calc
_refine_ls_weighting_details
'w=1/[\s^2^(Fo^2^)+(0.0248P)^2^] where P=(Fo^2^+2Fc^2^)/3'
_atom_sites_solution_primary      ?
_atom_sites_solution_secondary    ?
_atom_sites_solution_hydrogens    .
_refine_ls_hydrogen_treatment     undef
_refine_ls_extinction_method      'SHELXL-2018/3 (Sheldrick 2018)'
_refine_ls_extinction_coef        0.00000(3)
_refine_ls_extinction_expression
 'Fc^*^=kFc[1+0.001xFc^2^\l^3^/sin(2\q)]^-1/4^'
_refine_ls_abs_structure_details
;
 Flack x determined using 1228 quotients [(I+)-(I-)]/[(I+)+(I-)]
 (Parsons, Flack and Wagner, Acta Cryst. B69 (2013) 249-259).
;
_refine_ls_abs_structure_Flack    0.057(19)
_chemical_absolute_configuration  ?
_refine_ls_number_reflns          4635
_refine_ls_number_parameters      185
_refine_ls_number_restraints      7
_refine_ls_R_factor_all           0.0753
_refine_ls_R_factor_gt            0.0467
_refine_ls_wR_factor_ref          0.0885
_refine_ls_wR_factor_gt           0.0801
_refine_ls_goodness_of_fit_ref    0.979
_refine_ls_restrained_S_all       0.979
_refine_ls_shift/su_max           4.284
_refine_ls_shift/su_mean          0.023
 
loop_
 _atom_site_label
 _atom_site_type_symbol
 _atom_site_fract_x
 _atom_site_fract_y
 _atom_site_fract_z
 _atom_site_U_iso_or_equiv
 _atom_site_adp_type
 _atom_site_occupancy
 _atom_site_site_symmetry_order  
 _atom_site_calc_flag
 _atom_site_refinement_flags_posn
 _atom_site_refinement_flags_adp
 _atom_site_refinement_flags_occupancy
 _atom_site_disorder_assembly
 _atom_site_disorder_group
Pb1 Pb 0.42375(15) 0.59179(11) 1.2333(2) 0.0155(3) Uani 1 1 d . . . . .
Pb2 Pb 0.30409(12) 0.83327(11) 0.7880(2) 0.0158(3) Uani 1 1 d . . . . .
Pb3 Pb 0.19567(11) 0.34991(10) 0.26015(19) 0.0161(3) Uani 1 1 d . . . . .
Pb4 Pb 1.08080(15) 0.11328(11) 1.7786(2) 0.0183(3) Uani 1 1 d . . . . .
Pb5 Pb 0.15741(12) 0.86334(13) 1.1927(2) 0.0168(3) Uani 1 1 d . . . . .
Pb6 Pb 0.56213(15) 0.58316(11) 0.8044(2) 0.0167(3) Uani 1 1 d . . . . .
As1 As 0.3604(3) 0.3252(3) 0.8474(5) 0.0110(7) Uani 0.97 1 d . . P . .
Sb1 Sb 0.669(8) -0.139(9) 0.206(15) 0.0110(7) Uani 0.03 1 d . . P . .
As2 As 0.9377(4) 0.1161(3) 1.1504(6) 0.0093(8) Uani 0.97 1 d . . P . .
Sb2 Sb 0.948(10) -0.913(10) 0.199(16) 0.0093(8) Uani 0.03 1 d . . P . .
Cl1 Cl 0.9973(8) 0.3615(9) 1.4636(13) 0.0231(18) Uani 1 1 d . . . . .
Cl2 Cl 0.2384(8) 0.6058(9) 0.5085(14) 0.0237(19) Uani 1 1 d . . . . .
Cl3 Cl 0.5325(7) 1.3339(8) 0.5368(13) 0.0209(16) Uani 1 1 d . . . . .
Cl4 Cl 0.2646(8) 0.0907(10) 0.5060(13) 0.0237(19) Uani 1 1 d . . . . .
O1 O 0.463(2) 0.4506(17) 0.997(3) 0.018(5) Uani 1 1 d . U . . .
O2 O 0.224(2) 0.6865(18) 0.998(3) 0.020(5) Uani 1 1 d . . . . .
O3 O 0.2738(18) 0.2685(18) 1.003(4) 0.022(5) Uani 1 1 d . . . . .
O4 O 0.495(2) 0.2147(18) 0.961(3) 0.017(5) Uani 1 1 d . . . . .
O5 O 0.2446(19) 0.9790(18) 0.994(3) 0.019(5) Uani 1 1 d . . . . .
O6 O 1.022(2) 0.2215(17) 1.042(3) 0.015(4) Uani 1 1 d . . . . .
O7 O 0.047(2) 0.4958(18) 0.020(3) 0.023(5) Uani 1 1 d . . . . .
 
loop_
 _atom_site_aniso_label
 _atom_site_aniso_U_11
 _atom_site_aniso_U_22
 _atom_site_aniso_U_33
 _atom_site_aniso_U_23
 _atom_site_aniso_U_13
 _atom_site_aniso_U_12
Pb1 0.0164(6) 0.0127(7) 0.0189(8) 0.0007(5) 0.0085(6) -0.0006(4)
Pb2 0.0173(6) 0.0146(7) 0.0160(6) -0.0010(5) 0.0072(5) 0.0026(5)
Pb3 0.0136(6) 0.0125(6) 0.0228(7) -0.0002(6) 0.0077(5) -0.0016(5)
Pb4 0.0185(7) 0.0166(8) 0.0214(7) 0.0040(5) 0.0095(6) 0.0058(5)
Pb5 0.0192(7) 0.0150(6) 0.0175(6) -0.0003(5) 0.0086(5) -0.0028(5)
Pb6 0.0184(7) 0.0155(6) 0.0162(6) 0.0012(6) 0.0068(5) 0.0029(5)
As1 0.0125(18) 0.0088(16) 0.0126(18) -0.0016(12) 0.0060(14) 0.0002(12)
Sb1 0.0125(18) 0.0088(16) 0.0126(18) -0.0016(12) 0.0060(14) 0.0002(12)
As2 0.0080(17) 0.0070(17) 0.013(2) 0.0003(12) 0.0043(15) -0.0001(13)
Sb2 0.0080(17) 0.0070(17) 0.013(2) 0.0003(12) 0.0043(15) -0.0001(13)
Cl1 0.021(4) 0.022(4) 0.027(4) -0.007(4) 0.011(3) 0.000(3)
Cl2 0.022(5) 0.018(4) 0.032(5) -0.007(4) 0.011(4) -0.002(3)
Cl3 0.017(4) 0.020(4) 0.029(4) 0.004(4) 0.013(3) 0.001(3)
Cl4 0.023(5) 0.019(4) 0.026(4) -0.007(3) 0.006(4) 0.001(3)
O1 0.018(9) 0.023(8) 0.022(10) 0.003(7) 0.017(8) -0.002(7)
O2 0.016(11) 0.021(11) 0.021(13) 0.001(8) 0.007(10) 0.002(8)
O3 0.004(10) 0.023(11) 0.042(15) 0.000(9) 0.011(10) -0.003(8)
O4 0.023(12) 0.013(9) 0.013(10) -0.005(8) 0.004(9) 0.005(8)
O5 0.021(12) 0.009(10) 0.026(13) -0.006(8) 0.009(11) -0.006(7)
O6 0.019(11) 0.014(9) 0.008(10) 0.005(8) 0.003(8) -0.007(7)
O7 0.027(13) 0.019(10) 0.024(14) -0.002(9) 0.011(11) -0.007(9)
 
_geom_special_details
;
 All esds (except the esd in the dihedral angle between two l.s. planes)
 are estimated using the full covariance matrix.  The cell esds are taken
 into account individually in the estimation of esds in distances, angles
 and torsion angles; correlations between esds in cell parameters are only
 used when they are defined by crystal symmetry.  An approximate (isotropic)
 treatment of cell esds is used for estimating esds involving l.s. planes.
;
 
loop_
 _geom_bond_atom_site_label_1
 _geom_bond_atom_site_label_2
 _geom_bond_distance
 _geom_bond_site_symmetry_2
 _geom_bond_publ_flag
Pb1 O4 2.31(2) 2_657 ?
Pb1 O2 2.37(2) . ?
Pb1 O1 2.41(2) . ?
Pb1 Cl3 3.014(9) 2_647 ?
Pb1 Pb3 3.6588(17) 1_556 ?
Pb1 Pb6 3.6647(19) 1_556 ?
Pb2 O5 2.39(2) . ?
Pb2 O2 2.54(2) . ?
Pb2 O4 2.54(2) 2_657 ?
Pb2 O1 2.69(2) 2_657 ?
Pb2 Cl2 3.049(9) . ?
Pb2 Cl1 3.052(8) 2_657 ?
Pb3 O6 2.349(19) 1_454 ?
Pb3 O7 2.40(2) . ?
Pb3 O3 2.43(2) 1_554 ?
Pb3 Cl1 3.012(9) 1_454 ?
Pb3 Sb1 3.43(10) 2_656 ?
Pb4 O5 2.33(2) 1_646 ?
Pb4 O6 2.47(2) 1_556 ?
Pb4 O7 2.66(2) 2_647 ?
Pb4 O3 2.66(2) 1_656 ?
Pb5 O5 2.33(2) . ?
Pb5 O6 2.52(2) 2_657 ?
Pb5 O7 2.56(2) 2_556 ?
Pb5 O2 2.61(2) . ?
Pb5 Sb2 3.33(10) 1_476 ?
Pb6 O5 2.305(19) 2_647 ?
Pb6 O4 2.43(2) 2_657 ?
Pb6 O1 2.485(19) . ?
Pb6 O3 2.67(2) 2_657 ?
Pb6 Sb1 3.45(9) 2_656 ?
As1 Sb1 0.55(9) 2_656 ?
As1 O3 1.80(2) . ?
As1 O1 1.81(2) . ?
As1 O4 1.810(19) . ?
Sb1 O1 1.84(10) 2_646 ?
Sb1 O3 2.06(9) 2_646 ?
Sb1 O4 2.32(9) 2_646 ?
As2 Sb2 0.45(10) 1_566 ?
As2 O6 1.807(18) . ?
As2 O7 1.81(2) 2_646 ?
As2 O2 1.82(2) 2_647 ?
Sb2 O7 1.84(11) 2_635 ?
Sb2 O2 2.12(9) 2_636 ?
Sb2 O6 2.16(11) 1_544 ?
 
loop_
 _geom_angle_atom_site_label_1
 _geom_angle_atom_site_label_2
 _geom_angle_atom_site_label_3
 _geom_angle
 _geom_angle_site_symmetry_1
 _geom_angle_site_symmetry_3
 _geom_angle_publ_flag
O4 Pb1 O2 78.4(7) 2_657 . ?
O4 Pb1 O1 75.8(7) 2_657 . ?
O2 Pb1 O1 99.3(7) . . ?
O4 Pb1 Cl3 78.1(5) 2_657 2_647 ?
O2 Pb1 Cl3 84.3(5) . 2_647 ?
O1 Pb1 Cl3 152.2(5) . 2_647 ?
O4 Pb1 Pb3 150.0(5) 2_657 1_556 ?
O2 Pb1 Pb3 84.0(5) . 1_556 ?
O1 Pb1 Pb3 83.4(5) . 1_556 ?
Cl3 Pb1 Pb3 124.32(16) 2_647 1_556 ?
O4 Pb1 Pb6 124.5(5) 2_657 1_556 ?
O2 Pb1 Pb6 129.3(5) . 1_556 ?
O1 Pb1 Pb6 128.4(5) . 1_556 ?
Cl3 Pb1 Pb6 62.11(17) 2_647 1_556 ?
Pb3 Pb1 Pb6 85.42(4) 1_556 1_556 ?
O5 Pb2 O2 80.3(7) . . ?
O5 Pb2 O4 106.3(7) . 2_657 ?
O2 Pb2 O4 71.3(6) . 2_657 ?
O5 Pb2 O1 76.7(6) . 2_657 ?
O2 Pb2 O1 115.7(7) . 2_657 ?
O4 Pb2 O1 59.7(6) 2_657 2_657 ?
O5 Pb2 Cl2 150.4(5) . . ?
O2 Pb2 Cl2 79.4(5) . . ?
O4 Pb2 Cl2 87.3(5) 2_657 . ?
O1 Pb2 Cl2 132.0(4) 2_657 . ?
O5 Pb2 Cl1 78.4(5) . 2_657 ?
O2 Pb2 Cl1 82.1(5) . 2_657 ?
O4 Pb2 Cl1 151.5(5) 2_657 2_657 ?
O1 Pb2 Cl1 145.9(4) 2_657 2_657 ?
Cl2 Pb2 Cl1 77.7(2) . 2_657 ?
O6 Pb3 O7 78.1(6) 1_454 . ?
O6 Pb3 O3 74.3(7) 1_454 1_554 ?
O7 Pb3 O3 93.2(7) . 1_554 ?
O6 Pb3 Cl1 78.0(5) 1_454 1_454 ?
O7 Pb3 Cl1 84.0(5) . 1_454 ?
O3 Pb3 Cl1 152.2(5) 1_554 1_454 ?
O6 Pb3 Sb1 127.9(15) 1_454 2_656 ?
O7 Pb3 Sb1 128.1(16) . 2_656 ?
O3 Pb3 Sb1 133.7(15) 1_554 2_656 ?
Cl1 Pb3 Sb1 64.2(14) 1_454 2_656 ?
O6 Pb3 Pb1 140.8(5) 1_454 1_554 ?
O7 Pb3 Pb1 76.9(5) . 1_554 ?
O3 Pb3 Pb1 77.5(4) 1_554 1_554 ?
Cl1 Pb3 Pb1 128.10(18) 1_454 1_554 ?
Sb1 Pb3 Pb1 91.3(15) 2_656 1_554 ?
O5 Pb4 O6 99.8(7) 1_646 1_556 ?
O5 Pb4 O7 77.4(7) 1_646 2_647 ?
O6 Pb4 O7 59.4(6) 1_556 2_647 ?
O5 Pb4 O3 78.1(7) 1_646 1_656 ?
O6 Pb4 O3 68.5(6) 1_556 1_656 ?
O7 Pb4 O3 116.4(7) 2_647 1_656 ?
O5 Pb5 O6 109.4(7) . 2_657 ?
O5 Pb5 O7 79.3(7) . 2_556 ?
O6 Pb5 O7 72.2(6) 2_657 2_556 ?
O5 Pb5 O2 79.9(7) . . ?
O6 Pb5 O2 60.9(6) 2_657 . ?
O7 Pb5 O2 117.6(7) 2_556 . ?
O5 Pb5 Sb2 93(2) . 1_476 ?
O6 Pb5 Sb2 95.5(19) 2_657 1_476 ?
O7 Pb5 Sb2 33.1(19) 2_556 1_476 ?
O2 Pb5 Sb2 150.5(19) . 1_476 ?
O5 Pb6 O4 106.7(7) 2_647 2_657 ?
O5 Pb6 O1 82.5(7) 2_647 . ?
O4 Pb6 O1 72.1(6) 2_657 . ?
O5 Pb6 O3 78.3(7) 2_647 2_657 ?
O4 Pb6 O3 61.0(6) 2_657 2_657 ?
O1 Pb6 O3 120.4(7) . 2_657 ?
O5 Pb6 Sb1 98.5(16) 2_647 2_656 ?
O4 Pb6 Sb1 92.6(17) 2_657 2_656 ?
O1 Pb6 Sb1 31.0(17) . 2_656 ?
O3 Pb6 Sb1 150.3(17) 2_657 2_656 ?
O5 Pb6 Pb1 124.0(5) 2_647 1_554 ?
O4 Pb6 Pb1 128.0(5) 2_657 1_554 ?
O1 Pb6 Pb1 121.7(5) . 1_554 ?
O3 Pb6 Pb1 115.7(5) 2_657 1_554 ?
Sb1 Pb6 Pb1 90.8(16) 2_656 1_554 ?
Sb1 As1 O3 111(9) 2_656 . ?
Sb1 As1 O1 85(10) 2_656 . ?
O3 As1 O1 104.8(9) . . ?
Sb1 As1 O4 157(9) 2_656 . ?
O3 As1 O4 91.9(10) . . ?
O1 As1 O4 92.3(8) . . ?
As1 Sb1 O1 78(10) 2_646 2_646 ?
As1 Sb1 O3 55(8) 2_646 2_646 ?
O1 Sb1 O3 94(4) 2_646 2_646 ?
As1 Sb1 O4 18(7) 2_646 2_646 ?
O1 Sb1 O4 77(3) 2_646 2_646 ?
O3 Sb1 O4 72(3) 2_646 2_646 ?
As1 Sb1 Pb3 127(10) 2_646 2_646 ?
O1 Sb1 Pb3 137(4) 2_646 2_646 ?
O3 Sb1 Pb3 129(4) 2_646 2_646 ?
O4 Sb1 Pb3 116(3) 2_646 2_646 ?
As1 Sb1 Pb6 105(10) 2_646 2_646 ?
O1 Sb1 Pb6 44(2) 2_646 2_646 ?
O3 Sb1 Pb6 138(4) 2_646 2_646 ?
O4 Sb1 Pb6 94(3) 2_646 2_646 ?
Pb3 Sb1 Pb6 92(2) 2_646 2_646 ?
Sb2 As2 O6 139(10) 1_566 . ?
Sb2 As2 O7 86(10) 1_566 2_646 ?
O6 As2 O7 89.4(9) . 2_646 ?
Sb2 As2 O2 129(10) 1_566 2_647 ?
O6 As2 O2 91.8(9) . 2_647 ?
O7 As2 O2 104.2(10) 2_646 2_647 ?
O7 Sb2 O2 92(4) 2_635 2_636 ?
O7 Sb2 O6 79(4) 2_635 1_544 ?
O2 Sb2 O6 75(3) 2_636 1_544 ?
O7 Sb2 Pb5 50(2) 2_635 1_634 ?
O2 Sb2 Pb5 142(5) 2_636 1_634 ?
O6 Sb2 Pb5 95(4) 1_544 1_634 ?
Pb3 Cl1 Pb2 121.7(3) 1_656 2_647 ?
As1 O1 Sb1 17(3) . 2_656 ?
As1 O1 Pb1 129.8(10) . . ?
Sb1 O1 Pb1 125(3) 2_656 . ?
As1 O1 Pb6 114.8(10) . . ?
Sb1 O1 Pb6 105(3) 2_656 . ?
Pb1 O1 Pb6 103.6(7) . . ?
As1 O1 Pb2 101.2(8) . 2_647 ?
Sb1 O1 Pb2 117(3) 2_656 2_647 ?
Pb1 O1 Pb2 107.5(8) . 2_647 ?
Pb6 O1 Pb2 93.7(6) . 2_647 ?
As2 O2 Sb2 9(3) 2_657 2_666 ?
As2 O2 Pb1 128.6(10) 2_657 . ?
Sb2 O2 Pb1 124(3) 2_666 . ?
As2 O2 Pb2 114.0(10) 2_657 . ?
Sb2 O2 Pb2 111(3) 2_666 . ?
Pb1 O2 Pb2 104.2(7) . . ?
As2 O2 Pb5 101.7(8) 2_657 . ?
Sb2 O2 Pb5 111(3) 2_666 . ?
Pb1 O2 Pb5 108.8(8) . . ?
Pb2 O2 Pb5 93.9(6) . . ?
As1 O3 Sb1 14(2) . 2_656 ?
As1 O3 Pb3 137.5(10) . 1_556 ?
Sb1 O3 Pb3 129(3) 2_656 1_556 ?
As1 O3 Pb4 109.7(10) . 1_454 ?
Sb1 O3 Pb4 106(3) 2_656 1_454 ?
Pb3 O3 Pb4 104.0(7) 1_556 1_454 ?
As1 O3 Pb6 99.1(8) . 2_647 ?
Sb1 O3 Pb6 113(3) 2_656 2_647 ?
Pb3 O3 Pb6 104.9(8) 1_556 2_647 ?
Pb4 O3 Pb6 91.9(6) 1_454 2_647 ?
As1 O4 Pb1 123.7(11) . 2_647 ?
As1 O4 Sb1 5(2) . 2_656 ?
Pb1 O4 Sb1 120(3) 2_647 2_656 ?
As1 O4 Pb6 107.8(9) . 2_647 ?
Pb1 O4 Pb6 108.4(8) 2_647 2_647 ?
Sb1 O4 Pb6 113(2) 2_656 2_647 ?
As1 O4 Pb2 106.8(9) . 2_647 ?
Pb1 O4 Pb2 106.0(7) 2_647 2_647 ?
Sb1 O4 Pb2 106(2) 2_656 2_647 ?
Pb6 O4 Pb2 102.0(7) 2_647 2_647 ?
Pb6 O5 Pb4 111.4(8) 2_657 1_464 ?
Pb6 O5 Pb5 112.6(9) 2_657 . ?
Pb4 O5 Pb5 109.6(8) 1_464 . ?
Pb6 O5 Pb2 107.1(7) 2_657 . ?
Pb4 O5 Pb2 110.0(9) 1_464 . ?
Pb5 O5 Pb2 105.8(8) . . ?
As2 O6 Sb2 8(3) . 1_566 ?
As2 O6 Pb3 120.9(10) . 1_656 ?
Sb2 O6 Pb3 116(3) 1_566 1_656 ?
As2 O6 Pb4 109.4(9) . 1_554 ?
Sb2 O6 Pb4 108(3) 1_566 1_554 ?
Pb3 O6 Pb4 112.9(8) 1_656 1_554 ?
As2 O6 Pb5 105.6(9) . 2_647 ?
Sb2 O6 Pb5 113(3) 1_566 2_647 ?
Pb3 O6 Pb5 106.0(7) 1_656 2_647 ?
Pb4 O6 Pb5 99.5(7) 1_554 2_647 ?
As2 O7 Sb2 14(3) 2_656 2_665 ?
As2 O7 Pb3 136.1(11) 2_656 . ?
Sb2 O7 Pb3 134(4) 2_665 . ?
As2 O7 Pb5 107.7(10) 2_656 2_546 ?
Sb2 O7 Pb5 97(3) 2_665 2_546 ?
Pb3 O7 Pb5 102.9(7) . 2_546 ?
As2 O7 Pb4 101.8(9) 2_656 2_657 ?
Sb2 O7 Pb4 112(4) 2_665 2_657 ?
Pb3 O7 Pb4 107.0(8) . 2_657 ?
Pb5 O7 Pb4 93.6(7) 2_546 2_657 ?
 
_refine_diff_density_max    3.472
_refine_diff_density_min   -2.911
_refine_diff_density_rms    0.601

_shelx_res_file
;
TITL    shelx in space group P 21
    shelx.res
    created by SHELXL-2018/3 at 15:04:07 on 29-Jul-2019
CELL   0.71073 10.8383 10.8396  6.9809   90.000  113.279   90.000
ZERR   2        0.0020  0.0016  0.0012    0.000    0.012    0.000
LATT   -1
SYMM     - X, 1/2 + Y, - Z
SFAC     As   Cl   O    Pb   Sb
UNIT       4    8   14   12    1
L.S.    11
FMAP     2
PLAN    10
ACTA
BOND
REM TWIN -1 0 0 0 -1 0 0 0 -1
TEMP 20.00
EADP AS1 SB1
EADP AS2 SB2
REM OMIT 4 55
ISOR 0.01 O1
REM BASF   0.97933
WGHT    0.024800
EXTI    0.000000
FVAR       0.03459   0.01819   0.01717   0.02125  -0.00098   0.00898  -0.00247
PB1   4    0.423745    0.591793    1.233256    11.00000    0.01644    0.01266 =
         0.01891    0.00070    0.00850   -0.00057
PB2   4    0.304094    0.833271    0.788041    11.00000    0.01730    0.01458 =
         0.01602   -0.00103    0.00716    0.00256
PB3   4    0.195670    0.349907    0.260150    11.00000    0.01355    0.01253 =
         0.02276   -0.00021    0.00767   -0.00158
PB4   4    1.080802    0.113277    1.778645    11.00000    0.01846    0.01656 =
         0.02143    0.00399    0.00949    0.00577
PB5   4    0.157408    0.863341    1.192651    11.00000    0.01918    0.01500 =
         0.01748   -0.00028    0.00860   -0.00280
PB6   4    0.562133    0.583162    0.804426    11.00000    0.01841    0.01549 =
         0.01616    0.00116    0.00682    0.00294
AS1   1    0.360432    0.325194    0.847442    10.97000    0.01253    0.00876 =
         0.01265   -0.00159    0.00598    0.00022
SB1   5    0.668704   -0.138610    0.205612    10.03000    0.01253    0.00876 =
         0.01265   -0.00159    0.00598    0.00022
AS2   1    0.937739    0.116052    1.150390    10.97000    0.00805    0.00700 =
         0.01292    0.00027    0.00428   -0.00014
SB2   5    0.947677   -0.913436    0.198668    10.03000    0.00805    0.00700 =
         0.01292    0.00027    0.00428   -0.00014
CL1   2    0.997259    0.361517    1.463574    11.00000    0.02067    0.02244 =
         0.02733   -0.00685    0.01077   -0.00013
CL2   2    0.238440    0.605790    0.508507    11.00000    0.02172    0.01801 =
         0.03175   -0.00652    0.01110   -0.00204
CL3   2    0.532472    1.333880    0.536776    11.00000    0.01662    0.02020 =
         0.02923    0.00440    0.01252    0.00108
CL4   2    0.264552    0.090733    0.505960    11.00000    0.02280    0.01931 =
         0.02575   -0.00701    0.00624    0.00086
O1    3    0.463143    0.450616    0.997494    11.00000    0.01788    0.02285 =
         0.02157    0.00292    0.01701   -0.00181
O2    3    0.224105    0.686546    0.998158    11.00000    0.01634    0.02137 =
         0.02077    0.00105    0.00672    0.00206
O3    3    0.273783    0.268467    1.002835    11.00000    0.00368    0.02258 =
         0.04237   -0.00012    0.01051   -0.00297
O4    3    0.495017    0.214694    0.960572    11.00000    0.02319    0.01272 =
         0.01260   -0.00503    0.00354    0.00502
O5    3    0.244588    0.979022    0.994036    11.00000    0.02146    0.00890 =
         0.02579   -0.00589    0.00907   -0.00570
O6    3    1.022400    0.221542    1.042441    11.00000    0.01908    0.01441 =
         0.00808    0.00479    0.00287   -0.00703
O7    3    0.047057    0.495810    0.019909    11.00000    0.02685    0.01860 =
         0.02416   -0.00151    0.01098   -0.00721
HKLF    4


REM     shelx in space group P 21
REM wR2 = 0.0885, GooF = S = 0.979, Restrained GooF = 0.979 for all data
REM R1 = 0.0467 for 3435 Fo > 4sig(Fo) and 0.0753 for all 4635 data
REM 185 parameters refined using 7 restraints

END

WGHT      0.0248      0.0000

REM Highest difference peak  3.472,  deepest hole -2.911,  1-sigma level  0.601
Q1    1   0.1739  0.3453  0.1660  11.00000  0.05    3.47
Q2    1   0.3563  0.8703  0.7950  11.00000  0.05    3.08
Q3    1   1.0210  0.0967  1.7586  11.00000  0.05    3.06
Q4    1   1.1383  0.1104  1.7834  11.00000  0.05    2.97
Q5    1   0.3558  0.5975  1.2195  11.00000  0.05    2.94
Q6    1   0.2443  0.8307  0.7749  11.00000  0.05    2.87
Q7    1   1.0017 -0.9040  0.1785  11.00000  0.05    2.79
Q8    1   0.2248  0.9224  1.3282  11.00000  0.05    2.75
Q9    1   0.2224  0.8741  1.2059  11.00000  0.05    2.59
Q10   1   1.0631  0.0751  1.9367  11.00000  0.05    2.32
;
_shelx_res_checksum   71705

_shelx_hkl_file
;
   2   0  -2    1.72    0.49
   2   0  -2    1.24    0.43
   3   0  -3    6.48    0.78
   3   0  -3    8.75    0.78
   4   0  -4  252.98    7.98
  -4   0   4  267.32    8.06
   4   0  -4  278.18    8.14
  -5   0   5    4.61    1.01
   5   0  -5    1.92    1.24
   5   0  -5    3.87    1.10
  -6   0   6    3.09    1.29
  -7   0   7   24.41    2.05
  -8   0   8    3.63    1.90
  -9   0   9    4.42    2.34
   0  -1   0    0.01    0.09
   0   1   0    0.07    0.09
  -1  -1   1   12.00    0.71
   1  -1  -1   10.75    0.46
   1   1  -1    9.26    0.45
   2  -1  -2   56.88    1.83
  -2  -1   2   54.48    2.05
   2   1  -2   56.83    1.79
   3  -1  -3   14.43    0.94
  -3  -1   3   14.52    1.07
   3   1  -3   17.77    0.94
   4  -1  -4   60.71    2.29
  -4  -1   4   61.74    2.51
   4   1  -4   63.20    2.26
  -5  -1   5    8.03    1.19
   5  -1  -5    7.26    1.08
   5   1  -5    4.30    1.16
  -6  -1   6   34.03    2.13
   6  -1  -6   28.74    2.02
   6   1  -6   30.84    2.09
  -6   1   6   30.88    2.09
  -7  -1   7   17.24    1.99
  -7   1   7   17.57    1.85
  -8  -1   8    4.26    2.01
  -8   1   8    3.37    1.79
  -9  -1   9    8.30    2.49
  -9   1   9    8.08    2.42
   0  -2   0    1.75    0.21
   0   2   0    1.51    0.21
  -1  -2   1    7.75    0.56
   1  -2  -1    7.15    0.45
   1   2  -1    9.21    0.48
  -1   2   1    9.02    0.38
   2  -2  -2  949.60   25.97
  -2  -2   2  808.32   26.12
   2   2  -2  938.74   25.94
   3  -2  -3    1.45    0.47
  -3  -2   3    3.14    0.93
   3   2  -3    2.14    0.49
   4  -2  -4    1.89    0.65
  -4  -2   4    2.46    1.00
   4   2  -4    2.47    0.69
  -5  -2   5   32.17    2.01
   5  -2  -5   30.70    1.76
   5   2  -5   29.82    1.82
   6  -2  -6    7.65    1.30
  -6  -2   6   10.91    1.60
   6   2  -6   12.31    1.61
   7  -2  -7    7.78    1.62
  -7  -2   7    8.16    1.74
  -7   2   7    8.46    1.45
  -8  -2   8    1.86    1.89
  -8   2   8    4.08    1.72
  -9  -2   9    7.23    2.45
  -9   2   9   12.50    2.43
   0  -3   0   -0.29    0.24
   0   3   0    0.05    0.25
  -1  -3   1    5.62    0.46
   1  -3  -1    5.30    0.38
   1   3  -1    4.68    0.38
  -1   3   1    5.07    0.33
  -2  -3   2   33.70    1.59
   2  -3  -2   31.07    1.19
   2   3  -2   32.62    1.20
  -2   3   2   33.76    1.07
   3  -3  -3    8.33    0.63
  -3  -3   3    8.14    1.11
   3   3  -3    4.50    0.56
  -4  -3   4   77.29    3.13
   4  -3  -4   71.70    2.56
   4   3  -4   76.50    2.56
  -5  -3   5   17.40    1.64
   5  -3  -5   13.78    1.15
   5   3  -5   15.89    1.24
   6  -3  -6   16.23    1.44
  -6  -3   6   16.51    1.82
   6   3  -6   17.86    1.63
  -7  -3   7    3.20    1.69
   7  -3  -7    4.79    1.44
   8  -3  -8    2.83    1.84
  -8  -3   8    0.87    1.91
  -8   3   8    2.96    1.66
  -9  -3   9   12.28    2.50
  -9   3   9   16.64    2.51
   0  -4   0  988.82   28.65
   0   4   0 1000.00   28.65
  -1  -4   1   17.26    0.78
   1  -4  -1   16.10    0.73
  -1   4   1   16.76    0.70
   1   4  -1   16.70    0.76
  -2  -4   2   -0.86    0.54
   2  -4  -2    0.59    0.36
  -2   4   2    0.77    0.29
   2   4  -2    0.27    0.37
   3  -4  -3   18.81    0.99
  -3  -4   3   20.23    1.40
   3   4  -3   20.14    0.99
   4  -4  -4  134.37    4.20
  -4  -4   4  127.43    4.65
   4   4  -4  135.51    4.18
  -5  -4   5    1.24    1.32
   5  -4  -5    2.64    0.79
   5   4  -5    2.45    0.92
   6  -4  -6    1.74    1.01
  -6  -4   6    2.38    1.52
   6   4  -6    2.66    1.26
   7  -4  -7   18.92    1.80
  -7  -4   7   26.22    2.28
   7   4  -7   22.38    2.53
   8  -4  -8    7.35    1.83
  -8  -4   8    6.26    2.03
  -9  -4   9    1.18    2.37
  -9   4   9    5.91    2.22
   0  -5   0    0.23    0.33
   0   5   0    0.45    0.34
   1  -5  -1    4.58    0.44
  -1  -5   1    5.54    0.50
   1   5  -1    4.58    0.47
  -1   5   1    4.61    0.43
  -2  -5   2   47.73    1.72
   2  -5  -2   45.58    1.59
  -2   5   2   44.10    1.50
   2   5  -2   45.11    1.62
   3  -5  -3    6.95    0.65
  -3  -5   3    5.52    0.96
   3   5  -3    8.27    0.71
  -3   5   3    7.62    0.52
   4  -5  -4   24.05    1.29
  -4  -5   4   25.17    1.75
   4   5  -4   24.90    1.34
   5  -5  -5    7.60    0.97
  -5  -5   5    5.87    1.45
   5   5  -5    6.58    1.03
   6  -5  -6   30.63    1.91
  -6  -5   6   28.81    2.23
   6   5  -6   29.73    1.84
  -7  -5   7   18.63    2.13
   7  -5  -7   16.69    1.71
   7   5  -7   18.49    2.03
  -8  -5   8    2.70    2.06
   8  -5  -8    4.59    1.82
  -9  -5   9    2.42    2.40
   9  -5  -9    2.09    2.34
  -9   5   9    3.12    2.25
   0  -6   0    1.17    0.39
   0   6   0    0.80    0.41
  -1  -6   1   34.52    1.35
   1  -6  -1   34.99    1.31
  -1   6   1   36.23    1.31
   1   6  -1   37.83    1.36
   2  -6  -2  435.17   12.65
  -2  -6   2  425.10   12.69
  -2   6   2  439.02   12.58
   2   6  -2  429.85   12.66
   3  -6  -3    5.44    0.64
  -3  -6   3    5.87    0.92
   3   6  -3    5.64    0.68
  -3   6   3    6.41    0.56
  -4  -6   4    2.52    1.12
   4  -6  -4    2.18    0.64
   4   6  -4   -0.41    0.67
  -5  -6   5   26.79    2.06
   5  -6  -5   29.52    1.66
   5   6  -5   28.75    1.70
  -6  -6   6    9.08    1.72
   6  -6  -6    9.23    1.24
   6   6  -6   13.03    1.45
  -7  -6   7    3.86    1.80
   7  -6  -7    6.10    1.43
   7   6  -7    5.25    1.84
   8  -6  -8    1.38    1.74
  -8  -6   8    0.00    2.00
   9  -6  -9    3.61    2.44
  -9  -6   9    5.68    2.49
   0  -7   0    0.10    0.41
   0   7   0   -0.09    0.42
   1  -7  -1    4.15    0.54
  -1  -7   1    4.58    0.57
   1   7  -1    4.97    0.59
  -1   7   1    5.34    0.57
   2  -7  -2    8.78    0.72
  -2  -7   2   10.97    0.84
   2   7  -2   11.32    0.81
  -2   7   2   10.49    0.70
   3  -7  -3    4.32    0.65
  -3  -7   3    4.22    0.88
  -3   7   3    5.95    0.62
   3   7  -3    4.83    0.74
  -4  -7   4   55.48    2.57
   4  -7  -4   56.69    2.16
   4   7  -4   54.96    2.21
   5  -7  -5    8.66    1.03
  -5  -7   5    5.95    1.49
   5   7  -5   10.21    1.15
  -6  -7   6    5.30    1.69
   6  -7  -6    4.62    1.14
   6   7  -6    4.81    1.30
   7  -7  -7    2.13    1.37
  -7  -7   7    3.07    1.90
   7   7  -7    1.67    1.78
   8  -7  -8    4.29    1.89
  -8  -7   8    8.09    2.39
  -9  -7   9   18.99    3.03
   0  -8   0  391.45   11.44
   0   8   0  386.84   11.45
  -1  -8   1   29.12    1.31
   1  -8  -1   27.94    1.26
  -1   8   1   28.89    1.29
   1   8  -1   29.07    1.33
   2  -8  -2    1.02    0.53
  -2  -8   2    0.77    0.69
   2   8  -2   -0.04    0.59
  -2   8   2    0.85    0.57
   3  -8  -3   39.55    1.71
  -3  -8   3   40.23    1.94
  -3   8   3   41.73    1.64
   3   8  -3   43.69    1.84
  -4  -8   4   59.56    2.71
   4  -8  -4   60.76    2.35
   4   8  -4   60.34    2.42
   5  -8  -5    1.06    0.90
  -5  -8   5    2.06    1.40
   5   8  -5    2.26    1.05
  -6  -8   6    0.51    1.63
   6  -8  -6    2.72    1.19
   6   8  -6    1.14    1.30
   7  -8  -7   13.63    1.74
  -7  -8   7   14.83    2.25
   7   8  -7   14.89    2.06
  -8  -8   8   14.93    2.71
   8  -8  -8    9.80    2.09
   0  -9   0    0.14    0.59
   0   9   0   -0.10    0.60
   1  -9  -1    0.14    0.57
  -1  -9   1    0.03    0.59
   1   9  -1    0.71    0.66
  -1   9   1   -0.25    0.62
  -2  -9   2   26.59    1.49
   2  -9  -2   25.78    1.32
  -2   9   2   24.60    1.35
   2   9  -2   26.25    1.47
  -3  -9   3    2.77    0.96
   3  -9  -3    2.97    0.74
  -3   9   3    3.28    0.79
   3   9  -3    2.71    0.88
  -4  -9   4    4.61    1.25
   4  -9  -4    5.06    0.92
   4   9  -4    4.81    1.01
  -5  -9   5    7.47    1.65
   5  -9  -5    4.52    1.09
   5   9  -5    3.84    1.23
  -6  -9   6   24.86    2.55
   6  -9  -6   26.16    1.88
   6   9  -6   27.38    2.03
  -7  -9   7   12.89    2.55
   7  -9  -7   19.64    1.95
   7   9  -7   15.50    2.22
  -8  -9   8    6.26    2.92
   8  -9  -8    2.34    2.14
   8   9  -8    4.03    3.16
   0 -10   0    0.36    0.67
   0  10   0    0.88    0.76
  -1 -10   1   32.49    1.60
   1 -10  -1   32.57    1.54
  -1  10   1   33.56    1.62
   1  10  -1   35.23    1.71
  -2 -10   2  112.81    3.78
   2 -10  -2  115.35    3.70
  -2  10   2  107.72    3.68
   2  10  -2  111.23    3.79
  -3 -10   3    6.07    1.14
   3 -10  -3    5.07    0.93
   3  10  -3    8.30    1.09
  -3  10   3    7.31    1.07
   4 -10  -4    0.91    0.95
  -4 -10   4    1.12    1.27
   4  10  -4   -0.11    1.05
  -5 -10   5   25.08    2.19
   5 -10  -5   22.98    1.68
   5  10  -5   26.61    1.84
  -6 -10   6   10.68    2.35
   6 -10  -6    9.02    1.59
   6  10  -6   11.09    1.82
   7 -10  -7    2.44    1.76
  -7 -10   7    3.17    2.85
   7  10  -7    1.55    2.12
  -8 -10   8    0.97    3.93
   8  10  -8   -0.03    3.09
   0 -11   0   -0.98    0.75
   0  11   0   -0.05    0.84
   1 -11  -1   -0.28    0.77
  -1 -11   1    0.64    0.83
  -1  11   1    0.33    0.88
   1  11  -1    1.69    0.92
   2 -11  -2    2.44    0.89
  -2 -11   2    1.96    1.01
  -2  11   2    2.96    0.94
   2  11  -2    2.42    0.97
   3 -11  -3    5.02    1.00
  -3 -11   3    4.42    1.24
   3  11  -3    2.93    1.10
  -4 -11   4   30.61    2.11
   4 -11  -4   29.42    1.95
   4  11  -4   27.46    1.87
  -5 -11   5    5.05    1.87
   5 -11  -5    4.24    1.29
   5  11  -5    5.32    1.55
   6 -11  -6   -1.73    1.52
  -6 -11   6   -0.06    2.33
   6  11  -6    1.46    1.76
   7 -11  -7    2.18    1.96
   7  11  -7    1.63    2.39
   0 -12   0   72.11    2.80
   0  12   0   71.94    2.91
   1 -12  -1   17.71    1.34
  -1 -12   1   15.42    1.38
   1  12  -1   18.86    1.48
  -1  12   1   14.22    1.38
  -2 -12   2    1.94    1.13
   2 -12  -2   -0.67    0.99
   2  12  -2    0.10    1.08
  -2  12   2    0.40    1.08
   3 -12  -3   26.81    1.71
  -3 -12   3   27.32    1.99
   3  12  -3   26.62    1.81
   4 -12  -4    9.46    1.42
  -4 -12   4   10.62    1.83
   4  12  -4   10.81    1.61
  -5 -12   5    1.18    2.13
   5 -12  -5    0.02    1.42
   5  12  -5    1.68    1.61
   6 -12  -6    1.06    1.79
   6  12  -6   -1.48    1.94
   0 -13   0    0.19    1.18
   0  13   0    0.75    1.18
   1 -13  -1    1.28    1.14
  -1 -13   1   -0.14    1.20
   1  13  -1   -0.37    1.21
  -1  13   1    0.86    1.24
   2 -13  -2   11.03    1.42
  -2 -13   2   10.42    1.54
  -2  13   2   10.26    1.49
   2  13  -2    9.66    1.51
   3 -13  -3    0.55    1.27
  -3 -13   3    1.20    1.59
   3  13  -3    1.98    1.37
   4 -13  -4    0.36    1.42
   4  13  -4   -1.30    1.53
   5 -13  -5    4.44    1.75
   5  13  -5    2.38    1.90
   6 -13  -6   13.41    2.33
   0 -14   0   -0.17    1.39
   0  14   0   -0.24    1.42
   1 -14  -1   21.18    1.79
   1  14  -1   22.05    1.94
  -1  14   1   21.07    1.93
   2 -14  -2   15.04    1.71
   2  14  -2   16.64    1.79
   3 -14  -3    3.84    1.60
   3  14  -3    5.08    1.64
   4 -14  -4    0.59    1.81
   5 -14  -5   14.09    2.30
   0  15   0   -0.80    1.61
  -1  15   1   -0.82    1.72
   1  15  -1    0.67    1.67
   2  15  -2   -0.02    1.67
   3  15  -3    3.01    2.03
   0  16   0    8.61    2.15
   1  16  -1   10.10    2.20
  -9   0  10    2.01    4.12
  -8   0   9    9.76    2.36
  -7   0   8    7.01    1.94
  -6   0   7    0.48    1.45
   5   0  -6    1.11    1.56
  -5   0   6    0.90    1.19
   4   0  -5   95.11    3.41
  -4   0   5   85.76    3.32
  -3   0   4   58.96    2.26
   3   0  -4   54.04    2.32
   2   0  -3   -0.30    0.73
   2   0  -3    1.17    0.69
  -2   0   3   -0.20    0.60
  -1   0   2   -0.39    0.51
   1   0  -2    1.13    0.61
   0   0  -1   53.28    1.77
   0   0   1   56.07    1.79
  -1   0   0    0.13    0.11
   1   0   0   -0.14    0.06
   2   0  -1    0.78    0.24
   3   0  -2   36.12    1.32
   4   0  -3  475.45   13.95
   5   0  -4    3.04    0.84
  -6   0   5    7.49    1.10
   6   0  -5    8.99    1.23
  -7   0   6   -0.16    1.15
  -8   0   7   24.71    2.15
  -9   0   8   11.04    2.15
 -10   0   9    4.07    2.48
  -9  -1  10    2.15    3.53
  -8  -1   9   18.86    2.59
  -8   1   9   14.58    2.43
  -7  -1   8   18.69    2.25
  -7   1   8   16.53    2.14
  -6  -1   7   12.76    1.84
  -6   1   7   11.48    1.67
  -5  -1   6   24.47    1.91
   5  -1  -6   25.08    2.23
   5   1  -6   23.75    1.93
  -5   1   6   25.55    1.75
   4  -1  -5    7.77    1.29
  -4  -1   5    3.92    1.15
   4  -1  -5    5.63    1.08
   4   1  -5    4.65    1.17
  -4   1   5    4.64    0.96
   3  -1  -4   39.37    1.74
  -3  -1   4   35.52    1.90
   3  -1  -4   36.02    1.87
   3   1  -4   37.41    1.78
   2  -1  -3   11.33    0.81
  -2  -1   3   11.13    1.03
   2  -1  -3   10.42    0.91
   2   1  -3   10.87    0.83
  -1  -1   2   11.04    0.95
   1  -1  -2   10.28    0.67
   1  -1  -2    9.50    0.62
   1   1  -2   12.69    0.80
   0  -1  -1   17.80    0.65
   0  -1   1   18.38    0.83
   0  -1  -1   17.09    0.66
   0   1  -1   17.59    0.73
  -2  -1   1   12.06    0.66
   2  -1  -1   10.06    0.48
   2   1  -1   11.13    0.46
  -3  -1   2   18.37    1.05
   3  -1  -2   17.77    0.78
   3   1  -2   15.12    1.08
   3   1  -2   15.68    0.69
  -4  -1   3   26.83    1.40
   4  -1  -3   27.46    1.19
   4   1  -3   28.42    1.54
   4   1  -3   27.14    1.09
  -5  -1   4   14.28    1.17
   5  -1  -4   16.79    1.09
   5   1  -4   15.11    0.95
   6  -1  -5   48.04    2.14
  -6  -1   5   43.36    2.34
   6   1  -5   44.81    2.10
  -7  -1   6   20.17    1.81
   7  -1  -6   17.77    1.71
  -8  -1   7   31.89    2.37
   8  -1  -7   31.27    2.36
  -8   1   7   34.18    2.24
  -9  -1   8    4.82    2.03
  -9   1   8    5.36    1.86
 -10  -1   9   10.19    2.61
 -10   1   9    8.42    2.58
  -8  -2   9   -0.29    2.14
  -8   2   9   -0.55    2.12
  -7  -2   8   -1.04    1.83
  -7   2   8    1.17    1.76
   6  -2  -7   60.81    3.18
  -6  -2   7   56.76    3.18
  -6   2   7   59.17    2.98
   5  -2  -6   38.01    2.32
  -5  -2   6   36.30    2.56
   5   2  -6   37.22    2.51
   4  -2  -5    0.33    0.84
   4  -2  -5    1.14    1.13
  -4  -2   5    1.25    1.12
   4   2  -5    0.82    1.00
   3  -2  -4    7.28    0.88
   3  -2  -4    6.85    0.80
  -3  -2   4    7.29    1.12
   3   2  -4    7.26    0.88
   2  -2  -3   52.87    1.83
  -2  -2   3   53.54    2.34
   2  -2  -3   55.53    1.88
   2   2  -3   52.39    1.91
   1  -2  -2   48.89    1.61
  -1  -2   2   54.70    2.04
   1  -2  -2   51.05    1.65
   1   2  -2   47.17    1.69
   0  -2  -1    1.28    0.24
   0  -2   1    0.59    0.32
   0  -2  -1    1.06    0.28
   0   2  -1    1.84    0.31
  -1  -2   0   14.87    0.52
   1  -2   0   15.51    0.59
   1   2   0   15.43    0.58
  -1   2   0   15.22    0.58
  -2  -2   1  270.79    8.06
   2  -2  -1  275.56    7.98
   2   2  -1  276.37    7.96
   3  -2  -2   16.89    0.77
  -3  -2   2   14.37    1.12
   3   2  -2   17.56    0.73
  -4  -2   3    2.45    0.87
   4  -2  -3    3.62    0.52
   4   2  -3    2.73    0.44
  -5  -2   4   15.05    1.32
   5  -2  -4   14.03    0.97
   5   2  -4   15.50    1.05
   6  -2  -5  153.48    5.09
  -6  -2   5  154.61    5.37
   6   2  -5  165.72    5.02
  -7  -2   6    0.82    1.41
   7  -2  -6    2.53    1.10
  -8  -2   7    8.15    1.81
   8  -2  -7    7.44    1.61
  -9  -2   8    1.10    1.97
  -9   2   8    1.12    1.66
 -10  -2   9   -0.51    2.46
 -10   2   9   -0.11    2.27
  -8  -3   9   11.56    2.38
  -8   3   9   12.82    2.41
  -7  -3   8    4.40    1.89
  -7   3   8    9.31    1.81
  -6  -3   7   23.97    2.08
   6  -3  -7   21.71    1.94
   6   3  -7   21.02    2.27
  -5  -3   6   45.42    2.67
   5  -3  -6   42.62    2.29
   5   3  -6   46.87    2.57
   4  -3  -5    1.28    0.84
   4  -3  -5    2.00    0.93
  -4  -3   5   -0.31    1.14
   4   3  -5    0.28    0.99
   3  -3  -4    8.20    0.81
  -3  -3   4    6.00    1.25
   3  -3  -4    9.70    0.77
   3   3  -4   13.74    0.97
  -2  -3   3    1.66    0.94
   2  -3  -3    0.61    0.43
   2  -3  -3    0.77    0.47
   2   3  -3    0.53    0.53
   1  -3  -2   36.20    1.25
  -1  -3   2   37.40    1.57
   1  -3  -2   36.00    1.24
   1   3  -2   32.77    1.30
   0  -3   1   45.94    1.56
   0  -3  -1   48.10    1.49
   0   3  -1   48.50    1.56
   0   3   1   47.26    1.50
   1  -3   0    2.86    0.33
  -1  -3   0    2.99    0.28
   1   3   0    4.90    0.35
  -1   3   0    4.91    0.34
   2  -3  -1    4.13    0.37
  -2  -3   1    4.21    0.43
   2   3  -1    4.12    0.37
  -2   3   1    4.32    0.30
   3  -3  -2    8.36    0.52
  -3  -3   2    7.90    0.91
   3   3  -2    6.06    0.48
  -4  -3   3    7.94    1.13
   4  -3  -3    7.65    0.63
   4   3  -3    9.49    0.62
  -5  -3   4   25.37    1.71
   5  -3  -4   22.24    1.23
   5   3  -4   20.44    1.17
  -6  -3   5   45.90    2.57
   6  -3  -5   44.97    1.99
   6   3  -5   42.61    1.99
   7  -3  -6    4.81    1.13
  -7  -3   6    6.94    1.56
   7   3  -6    5.92    1.38
  -8  -3   7   24.88    2.33
   8  -3  -7   23.92    1.97
   9  -3  -8   11.19    2.12
  -9  -3   8    8.25    2.19
  -9   3   8    7.67    1.83
 -10  -3   9    4.10    2.48
 -10   3   9    8.05    2.40
  -8  -4   9    7.21    2.31
  -8   4   9    9.88    2.32
   7  -4  -8    8.68    1.94
  -7  -4   8    6.73    2.01
  -7   4   8   11.15    1.85
   6  -4  -7    1.38    1.37
  -6  -4   7    3.10    1.63
   6   4  -7    0.24    1.74
  -5  -4   6    4.77    1.55
   5  -4  -6    4.42    1.14
   5   4  -6    5.86    1.42
  -4  -4   5  111.18    4.14
   4  -4  -5  108.65    3.71
   4   4  -5  108.75    3.76
   3  -4  -4   51.44    1.97
  -3  -4   4   51.66    2.62
   3  -4  -4   53.33    1.87
   3   4  -4   53.68    2.07
   2  -4  -3    1.07    0.48
   2  -4  -3    0.32    0.46
  -2  -4   3    1.92    0.89
   2   4  -3    0.67    0.53
  -1  -4   2   10.92    0.79
   1  -4  -2   11.05    0.64
  -1   4   2    8.56    0.58
   1   4  -2    9.01    0.63
   0  -4   1    3.46    0.43
   0  -4  -1    3.13    0.35
   0   4  -1    3.13    0.43
   0   4   1    3.06    0.36
  -1  -4   0   44.37    1.41
   1  -4   0   44.48    1.47
  -1   4   0   44.73    1.45
   1   4   0   43.18    1.47
   2  -4  -1    0.14    0.31
  -2  -4   1    0.05    0.32
   2   4  -1    0.15    0.31
  -2   4   1    0.08    0.27
   3  -4  -2   27.28    1.07
  -3  -4   2   26.14    1.34
   3   4  -2   27.16    1.07
  -4  -4   3  214.00    7.04
   4  -4  -3  231.58    6.78
   4   4  -3  232.59    6.74
  -5  -4   4   17.66    1.61
   5  -4  -4   17.81    1.09
   5   4  -4   17.82    1.10
   6  -4  -5    5.50    0.86
  -6  -4   5    6.92    1.45
   6   4  -5    6.64    0.97
   7  -4  -6    2.87    1.07
  -7  -4   6    2.68    1.53
   7   4  -6    5.97    1.28
   8  -4  -7   15.50    1.69
  -8  -4   7   19.52    2.22
   9  -4  -8    8.13    1.93
  -9  -4   8    5.43    2.13
  10  -4  -9    3.43    2.37
 -10  -4   9    0.34    2.53
 -10   4   9    7.00    2.38
   8  -5  -9   10.90    2.54
  -8  -5   9   13.37    2.47
  -8   5   9   12.89    2.48
  -7  -5   8   25.76    2.42
   7  -5  -8   16.45    2.14
   6  -5  -7    3.79    1.41
  -6  -5   7    4.20    1.69
   6   5  -7    4.80    1.80
   5  -5  -6    4.35    1.15
  -5  -5   6    4.37    1.56
   5   5  -6    5.79    1.38
  -4  -5   5   15.90    1.70
   4  -5  -5   13.31    1.10
   4   5  -5   14.28    1.26
   3  -5  -4   48.94    1.90
  -3  -5   4   44.75    2.51
   3   5  -4   50.40    1.98
   2  -5  -3   25.08    1.14
  -2  -5   3   26.13    1.56
   2   5  -3   24.86    1.24
  -2   5   3   24.26    1.02
   1  -5  -2    0.68    0.38
  -1  -5   2    0.65    0.55
  -1   5   2    1.20    0.37
   1   5  -2    0.34    0.43
   0  -5  -1    2.07    0.35
   0  -5   1    1.84    0.43
   0   5   1    1.93    0.38
   0   5  -1    1.80    0.43
  -1  -5   0    5.59    0.42
   1  -5   0    6.11    0.50
  -1   5   0    7.01    0.50
   1   5   0    5.95    0.50
   2  -5  -1   26.77    1.04
  -2  -5   1   24.77    1.02
   2   5  -1   25.39    1.05
  -2   5   1   27.53    0.98
  -3  -5   2   13.16    0.85
   3  -5  -2   14.02    0.81
  -3   5   2   14.09    0.68
   3   5  -2   13.54    0.81
   4  -5  -3   19.83    1.06
  -4  -5   3   20.69    1.34
   4   5  -3   20.22    1.05
  -5  -5   4    5.10    1.26
   5  -5  -4    3.40    0.67
   5   5  -4    5.02    0.70
  -6  -5   5   20.41    1.89
   6  -5  -5   19.16    1.29
   6   5  -5   21.26    1.29
   7  -5  -6   13.01    1.33
  -7  -5   6   13.63    1.87
   7   5  -6   15.46    1.49
   8  -5  -7   23.20    1.87
  -8  -5   7   20.10    2.26
  -9  -5   8    0.07    2.15
   9  -5  -8    1.91    1.73
  10  -5  -9    5.44    2.50
 -10  -5   9    8.87    2.76
 -10   5   9    9.20    2.44
   8  -6  -9   -0.02    2.42
  -8  -6   9    2.90    2.21
  -8   6   9    1.99    2.40
   7  -6  -8   -0.12    1.77
  -7  -6   8    0.37    1.91
   7   6  -8    1.90    3.71
   6  -6  -7   40.49    2.57
  -6  -6   7   35.26    2.55
   6   6  -7   36.72    2.52
  -5  -6   6   21.04    1.99
   5  -6  -6   20.57    1.58
   5   6  -6   17.42    1.62
   4  -6  -5    0.68    0.83
  -4  -6   5    2.33    1.37
   4   6  -5    1.37    1.00
  -3  -6   4   13.60    1.45
   3  -6  -4   11.53    0.92
   3   6  -4   13.52    1.06
  -3   6   4   12.51    0.80
  -2  -6   3   37.56    1.80
   2  -6  -3   37.13    1.41
  -2   6   3   30.93    1.30
   2   6  -3   30.98    1.49
   1  -6  -2   65.34    2.13
  -1  -6   2   67.01    2.26
   1   6  -2   63.66    2.21
  -1   6   2   62.17    2.10
   0  -6   1    0.02    0.44
   0  -6  -1    0.52    0.37
   0   6   1    0.81    0.42
   0   6  -1    0.96    0.44
  -1  -6   0   19.29    0.87
   1  -6   0   20.77    0.94
   1   6   0   20.38    0.94
  -1   6   0   20.83    0.94
  -2  -6   1  138.22    4.20
   2  -6  -1  142.16    4.24
  -2   6   1  138.43    4.18
   2   6  -1  137.16    4.24
  -3  -6   2   63.05    2.15
   3  -6  -2   61.27    2.10
   3   6  -2   60.84    2.11
  -3   6   2   63.17    2.01
   4  -6  -3    1.42    0.52
  -4  -6   3    2.56    0.81
   4   6  -3    2.22    0.58
   5  -6  -4   16.01    1.06
  -5  -6   4   15.48    1.49
   5   6  -4   18.56    1.19
  -6  -6   5   84.38    3.57
   6  -6  -5   82.60    2.99
   6   6  -5   81.95    2.99
   7  -6  -6    6.53    1.16
  -7  -6   6    5.53    1.73
   7   6  -6    6.50    1.35
  -8  -6   7    4.55    2.00
   8  -6  -7    4.26    1.40
   8   6  -7    5.67    2.26
   9  -6  -8    4.31    1.83
  -9  -6   8    3.40    2.35
 -10  -6   9    1.47    2.78
   8  -7  -9    2.62    2.65
  -8  -7   9    7.49    2.55
   7  -7  -8    1.82    1.86
  -7  -7   8    1.76    2.03
   7   7  -8   -0.05    2.47
  -6  -7   7   24.11    2.31
   6  -7  -7   20.60    1.88
   6   7  -7   20.78    2.16
  -5  -7   6   41.09    2.61
   5  -7  -6   39.16    2.16
   5   7  -6   41.01    2.46
  -4  -7   5    3.57    1.40
   4  -7  -5    2.62    0.88
   4   7  -5    3.93    1.10
  -3  -7   4   -0.04    1.10
   3  -7  -4    0.45    0.70
  -3   7   4    0.02    0.62
   3   7  -4    0.40    0.82
   2  -7  -3    2.52    0.60
  -2  -7   3    2.33    0.86
  -2   7   3    1.93    0.57
   2   7  -3    2.38    0.72
  -1  -7   2   12.62    0.94
   1  -7  -2   12.02    0.86
   1   7  -2   14.04    0.92
  -1   7   2   13.70    0.82
   0  -7  -1   55.93    1.91
   0  -7   1   57.81    2.00
   0   7   1   56.32    1.94
   0   7  -1   57.04    2.00
  -1  -7   0    2.14    0.44
   1  -7   0    2.33    0.50
   1   7   0    2.12    0.51
  -1   7   0    2.57    0.51
  -2  -7   1    2.48    0.50
   2  -7  -1    2.54    0.51
   2   7  -1    3.17    0.58
  -2   7   1    3.83    0.52
   3  -7  -2    0.03    0.50
  -3  -7   2    1.21    0.58
  -3   7   2    1.59    0.49
   3   7  -2    0.79    0.51
  -4  -7   3    3.80    0.85
   4  -7  -3    3.89    0.64
   4   7  -3    4.70    0.72
  -5  -7   4   20.65    1.55
   5  -7  -4   20.54    1.33
   5   7  -4   19.63    1.37
   6  -7  -5   24.24    1.63
  -6  -7   5   23.38    1.97
   6   7  -5   21.97    1.44
  -7  -7   6    4.19    1.79
   7  -7  -6    1.92    1.13
   7   7  -6    3.13    1.29
  -8  -7   7   16.63    2.35
   8  -7  -7   13.26    1.68
   8   7  -7   13.70    1.98
  -9  -7   8    7.84    2.65
   9  -7  -8    7.64    1.98
 -10  -7   9    9.35    3.68
  -7  -8   8    8.70    2.41
   7  -8  -8    1.36    1.99
   7   8  -8    1.60    2.54
  -6  -8   7    1.46    1.82
   6  -8  -7    0.80    1.48
   6   8  -7   -0.61    1.80
  -5  -8   6    8.10    1.78
   5  -8  -6    5.63    1.29
   5   8  -6    5.08    1.46
  -4  -8   5   49.01    2.84
   4  -8  -5   51.19    2.23
   4   8  -5   43.00    2.36
   3  -8  -4   34.50    1.71
  -3  -8   4   40.67    2.28
   3   8  -4   37.17    1.90
  -3   8   4   33.42    1.66
  -2  -8   3    0.65    0.87
   2  -8  -3    0.41    0.61
  -2   8   3    1.56    0.65
   2   8  -3    0.59    0.73
  -1  -8   2   16.15    1.10
   1  -8  -2   13.81    0.93
   1   8  -2   14.90    1.06
  -1   8   2   15.59    0.96
   0  -8   1    6.62    0.72
   0  -8  -1    5.66    0.63
   0   8  -1    5.02    0.70
   0   8   1    6.46    0.68
   1  -8   0   92.37    2.96
  -1  -8   0   89.95    2.89
  -1   8   0   90.78    2.96
   1   8   0   88.12    2.94
  -2  -8   1    0.61    0.54
   2  -8  -1    0.39    0.53
   2   8  -1    1.01    0.55
  -2   8   1    0.32    0.53
   3  -8  -2   16.52    1.03
  -3  -8   2   16.06    1.04
   3   8  -2   18.44    1.15
  -3   8   2   17.68    1.04
   4  -8  -3  118.07    3.81
  -4  -8   3  119.57    3.92
   4   8  -3  114.82    3.83
  -4   8   3  116.24    3.91
   5  -8  -4   31.19    1.71
  -5  -8   4   33.65    2.08
   5   8  -4   35.09    1.76
  -6  -8   5    2.37    1.45
   6  -8  -5    1.71    0.93
   6   8  -5    4.88    1.07
  -7  -8   6   10.89    2.02
   7  -8  -6   10.31    1.35
   7   8  -6   10.64    1.47
   8  -8  -7   10.03    1.66
  -8  -8   7   12.82    2.43
   8   8  -7   11.22    2.07
   9  -8  -8    3.37    1.96
  -9  -8   8    8.97    2.89
  -7  -9   8   12.97    2.81
   7  -9  -8   14.21    2.37
   7   9  -8   13.54    2.88
   6  -9  -7    1.19    1.64
  -6  -9   7    1.17    2.12
   6   9  -7    0.71    1.94
   5  -9  -6    0.02    1.25
  -5  -9   6    1.02    1.88
   5   9  -6    0.56    1.50
   4  -9  -5   10.13    1.22
  -4  -9   5   11.30    1.78
   4   9  -5   12.61    1.42
  -3  -9   4   31.19    2.22
   3  -9  -4   30.21    1.74
   3   9  -4   39.81    2.01
  -2  -9   3   32.71    1.88
   2  -9  -3   28.91    1.51
  -2   9   3   32.18    1.54
   2   9  -3   29.47    1.70
   1  -9  -2    1.51    0.69
  -1  -9   2    1.12    0.77
  -1   9   2    1.93    0.69
   1   9  -2    0.10    0.74
   0  -9  -1    0.30    0.56
   0  -9   1    0.22    0.60
   0   9  -1    1.34    0.68
   0   9   1    0.29    0.65
   1  -9   0    0.20    0.59
  -1  -9   0    0.11    0.58
  -1   9   0    0.61    0.66
   1   9   0    0.39    0.61
  -2  -9   1   25.85    1.30
   2  -9  -1   27.49    1.33
  -2   9   1   24.83    1.34
   2   9  -1   25.20    1.36
  -3  -9   2    8.03    0.92
   3  -9  -2    7.40    0.84
  -3   9   2    7.67    0.86
   3   9  -2    6.66    0.86
  -4  -9   3   12.25    1.17
   4  -9  -3   11.21    1.02
   4   9  -3   11.41    1.06
   5  -9  -4   -0.73    0.82
  -5  -9   4    0.66    1.19
   5   9  -4   -0.45    0.88
  -6  -9   5    5.76    1.67
   6  -9  -5    4.76    1.09
   6   9  -5    7.00    1.25
  -7  -9   6   12.87    2.18
   7  -9  -6    9.69    1.48
   7   9  -6   11.19    1.68
  -8  -9   7    8.88    2.63
   8  -9  -7    8.76    1.71
   8   9  -7    8.02    2.15
   7 -10  -8    0.14    2.63
  -7 -10   8    1.85    3.27
   7  10  -8    1.32    2.97
   6 -10  -7   16.30    2.10
  -6 -10   7   19.29    3.04
   6  10  -7   13.87    2.39
  -5 -10   6    6.92    2.25
   5 -10  -6    5.10    1.47
   5  10  -6    9.11    1.83
  -4 -10   5    2.12    1.68
   4 -10  -5    2.57    1.12
   4  10  -5    0.50    1.32
  -3 -10   4   15.47    1.64
   3 -10  -4   16.72    1.29
   3  10  -4   14.42    1.42
  -2 -10   3   18.15    1.49
   2 -10  -3   20.42    1.27
   2  10  -3   21.36    1.43
  -2  10   3   19.41    1.29
  -1 -10   2   63.54    2.45
   1 -10  -2   61.02    2.31
   1  10  -2   56.52    2.43
  -1  10   2   58.59    2.33
   0 -10  -1    0.63    0.68
   0 -10   1    0.37    0.72
   0  10   1    0.68    0.80
   0  10  -1    0.38    0.77
  -1 -10   0   13.65    0.97
   1 -10   0   13.63    1.03
   1  10   0   14.23    1.10
  -1  10   0   13.01    1.06
  -2 -10   1   42.19    1.75
   2 -10  -1   41.94    1.74
  -2  10   1   35.21    1.78
   2  10  -1   38.06    1.82
  -3 -10   2   64.87    2.52
   3 -10  -2   65.95    2.47
   3  10  -2   64.49    2.53
  -3  10   2   66.91    2.47
  -4 -10   3    2.43    1.07
   4 -10  -3   -0.15    0.83
   4  10  -3   -0.38    0.86
  -5 -10   4    9.64    1.48
   5 -10  -4    8.94    1.17
   5  10  -4   12.85    1.30
   6 -10  -5   30.71    2.01
  -6 -10   5   27.43    2.26
   6  10  -5   27.23    1.87
   7 -10  -6   10.02    1.61
  -7 -10   6    6.80    2.63
   7  10  -6    7.37    1.67
   8 -10  -7   -0.02    1.71
   8  10  -7    1.39    2.25
   6 -11  -7    8.60    2.20
  -6 -11   7   16.64    3.26
   6  11  -7   10.18    2.47
   5 -11  -6   29.57    2.22
  -5 -11   6   25.67    2.80
   5  11  -6   26.90    2.37
  -4 -11   5    7.44    1.90
   4 -11  -5    6.02    1.39
   4  11  -5    5.08    1.59
  -3 -11   4    3.23    1.49
   3 -11  -4    4.44    1.15
   3  11  -4    0.78    1.24
   2 -11  -3    2.34    0.96
  -2 -11   3    1.57    1.14
  -2  11   3    2.41    1.03
   2  11  -3    1.67    1.12
  -1 -11   2    9.04    1.15
   1 -11  -2    7.08    1.03
   1  11  -2    6.59    1.11
  -1  11   2    9.56    1.09
   0 -11   1   40.99    1.96
   0 -11  -1   41.59    1.88
   0  11   1   38.68    1.99
   0  11  -1   42.18    2.05
  -1 -11   0    0.38    0.79
   1 -11   0    0.04    0.79
  -1  11   0    1.81    0.91
   1  11   0    0.50    0.85
   2 -11  -1    2.21    0.82
  -2 -11   1    1.77    0.87
  -2  11   1    2.95    0.94
   2  11  -1    2.67    0.93
  -3 -11   2    1.69    0.96
   3 -11  -2    1.56    0.86
   3  11  -2    0.78    0.90
  -3  11   2    2.22    0.99
  -4 -11   3    2.60    1.21
   4 -11  -3    1.60    0.96
   4  11  -3    3.00    1.12
   5 -11  -4   10.77    1.30
  -5 -11   4    5.68    1.59
   5  11  -4    8.69    1.34
   6 -11  -5   11.56    1.48
   6  11  -5   13.81    1.66
   7 -11  -6    0.75    1.56
   7  11  -6    1.22    1.75
   8 -11  -7    2.18    2.08
   8  11  -7    6.37    2.62
   6 -12  -7    1.79    2.53
  -6 -12   7    1.34    3.42
   5 -12  -6    7.54    1.98
  -5 -12   6    7.42    2.82
   5  12  -6    7.85    2.29
   4 -12  -5   21.96    1.88
  -4 -12   5   17.28    2.38
   4  12  -5   18.11    2.03
   3 -12  -4   19.14    1.67
  -3 -12   4   14.49    1.91
   3  12  -4   15.69    1.76
  -2 -12   3   -0.11    1.30
   2 -12  -3    0.57    1.10
   2  12  -3    0.28    1.21
   1 -12  -2   19.39    1.42
  -1 -12   2   16.04    1.53
   1  12  -2   14.61    1.47
  -1  12   2   17.74    1.48
   0 -12   1    0.31    1.04
   0 -12  -1    0.55    1.00
   0  12   1    0.14    1.03
   0  12  -1    1.88    1.11
   1 -12   0   61.28    2.48
  -1 -12   0   59.45    2.45
  -1  12   0   56.58    2.58
   1  12   0   57.44    2.59
   2 -12  -1    0.82    0.94
  -2 -12   1    1.51    1.05
   2  12  -1    0.93    1.04
  -2  12   1   -0.44    1.06
  -3 -12   2    8.41    1.48
   3 -12  -2    9.16    1.19
   3  12  -2    7.59    1.29
   4 -12  -3   26.49    1.73
   4  12  -3   30.58    1.89
   5 -12  -4   25.11    1.79
   5  12  -4   25.63    2.00
   6 -12  -5    0.68    1.44
   6  12  -5    1.78    1.57
   7 -12  -6    8.49    1.92
   7  12  -6    7.54    2.17
   5 -13  -6    2.87    2.30
  -4 -13   5    9.58    2.49
   4 -13  -5    8.79    1.90
   4  13  -5    5.43    2.09
   3 -13  -4   15.13    1.77
  -3 -13   4   14.21    2.17
   3  13  -4   16.37    1.91
   2 -13  -3   16.93    1.62
  -2 -13   3   21.11    1.97
   2  13  -3   21.62    1.89
  -1 -13   2    2.59    1.40
   1 -13  -2    7.29    1.29
   1  13  -2    2.71    1.30
  -1  13   2    3.01    1.38
   0 -13   1    1.04    1.26
   0 -13  -1    1.79    1.18
   0  13   1    0.96    1.25
   0  13  -1    0.67    1.20
   1 -13   0    1.98    1.14
   1  13   0    0.21    1.21
  -1  13   0    0.54    1.19
   2 -13  -1   20.31    1.58
  -2  13   1   18.63    1.64
   2  13  -1   19.17    1.66
   3 -13  -2    2.74    1.20
   3  13  -2    3.75    1.34
   4 -13  -3    3.78    1.31
   4  13  -3    3.91    1.38
   5 -13  -4   -0.25    1.42
   5  13  -4    2.26    1.54
   6 -13  -5   -1.63    1.59
   6  13  -5    2.38    1.90
  -3 -14   4   11.07    3.22
   3  14  -4    8.73    1.98
  -2 -14   3    8.31    2.02
   2  14  -3    9.50    1.80
  -1 -14   2   31.13    2.32
   1  14  -2   30.56    2.18
  -1  14   2   29.49    2.17
   0 -14   1   -0.58    1.48
   0  14  -1    1.00    1.43
   0  14   1   -1.79    1.48
   1 -14   0    7.63    1.48
  -1  14   0    8.51    1.61
   1  14   0   10.16    1.62
   2 -14  -1    7.36    1.51
   2  14  -1    6.94    1.53
  -2  14   1    7.22    1.62
   3 -14  -2   39.07    2.63
   3  14  -2   38.31    2.68
   4 -14  -3    2.36    1.57
   4  14  -3    1.77    1.62
   5 -14  -4    4.28    1.77
   5  14  -4    2.37    1.86
   2  15  -3    2.26    1.97
   1  15  -2    0.01    1.82
   0 -15   1   16.69    2.06
   0  15   1   21.85    2.13
   0  15  -1   21.17    2.15
   1 -15   0    2.25    1.70
   1  15   0    1.36    1.67
  -1  15   0    0.87    1.70
   2 -15  -1    1.75    1.71
   2  15  -1   -0.61    1.67
   3 -15  -2    4.97    1.84
   3  15  -2    3.22    1.78
   4 -15  -3    3.11    1.90
   4  15  -3    4.55    3.21
   0  16   1    1.07    2.09
   0  16  -1    2.07    2.10
  -1  16   0   27.99    2.64
   1  16   0   33.40    2.65
  -8   0  10    1.41    2.67
  -7   0   9    1.15    2.06
  -6   0   8    7.66    1.95
  -5   0   7    4.85    1.59
   4   0  -6   72.48    3.22
  -4   0   6   69.03    3.14
  -3   0   5   -0.47    0.97
   3   0  -5    0.99    1.16
   2   0  -4    1.67    0.97
  -2   0   4    0.21    0.81
   1   0  -3    6.79    0.93
  -1   0   3    7.64    0.88
   0   0  -2  391.41   11.29
   0   0   2  376.60   11.31
   1   0   1   14.15    0.77
  -1   0  -1   13.72    0.83
   2   0   0    0.65    0.15
  -2   0   0    0.91    0.22
   3   0  -1    7.75    0.46
   4   0  -2    2.77    0.45
   5   0  -3    1.37    0.56
   6   0  -4    0.84    0.74
   7   0  -5   64.40    2.82
   8   0  -6   66.36    3.14
  -8   0   6   64.72    3.00
  -9   0   7    6.13    1.69
 -10   0   8    0.08    1.95
 -11   0   9   12.20    2.85
  -8  -1  10   -0.18    2.52
  -8   1  10    3.33    2.80
  -7  -1   9   10.02    2.34
  -7   1   9   12.04    2.43
  -6  -1   8   13.52    2.11
  -6   1   8   20.14    2.23
  -5  -1   7   12.79    1.81
   5   1  -7   14.37    2.09
  -5   1   7   16.66    1.81
  -4  -1   6   47.41    2.65
   4  -1  -6   55.59    2.89
  -4   1   6   49.33    2.56
   4   1  -6   53.18    2.86
   3  -1  -5   21.32    1.61
  -3  -1   5   18.01    1.52
   3   1  -5   15.51    1.48
  -3   1   5   14.00    1.29
   2  -1  -4   58.74    2.37
  -2  -1   4   53.54    2.42
   2  -1  -4   55.22    2.31
   2   1  -4   60.74    2.39
  -2   1   4   57.03    2.22
   1  -1  -3   18.67    1.17
   1  -1  -3   19.59    1.22
  -1  -1   3   20.69    1.36
  -1   1   3   24.70    1.22
   1   1  -3   21.21    1.37
   0  -1   2   17.29    1.10
   0  -1  -2   17.07    0.97
   0  -1  -2   15.11    0.95
   0   1  -2   15.88    1.09
   0   1   2   15.04    0.91
   1  -1   1    7.98    0.46
  -1  -1  -1    7.66    0.46
   1   1   1    7.02    0.51
  -1   1  -1    6.71    0.61
  -2  -1   0   10.69    0.50
   2  -1   0   10.86    0.46
  -2   1   0   10.32    0.61
   3  -1  -1    4.16    0.34
   3   1  -1    5.11    0.45
   3   1  -1    3.95    0.29
   4  -1  -2   17.18    0.79
   4   1  -2   16.91    1.00
   4   1  -2   15.49    0.65
   5  -1  -3    2.28    0.54
   5   1  -3    2.70    0.76
  -6  -1   4    9.07    1.03
   6  -1  -4    5.92    0.79
   6   1  -4    7.18    0.73
   6   1  -4    6.55    1.09
   7  -1  -5   11.30    1.19
  -7  -1   5   17.66    1.46
   8  -1  -6    3.77    1.29
  -8  -1   6    3.47    1.38
  -9  -1   7    5.18    1.75
   9  -1  -7    6.10    1.73
  -9   1   7    6.71    1.57
 -10  -1   8    9.27    2.19
 -10   1   8   11.52    2.10
 -11  -1   9    4.51    2.60
 -11   1   9    3.13    2.50
  -8  -2  10    3.46    2.76
  -8   2  10    3.04    3.34
  -7  -2   9    5.50    2.15
  -7   2   9    5.93    2.23
  -6  -2   8    6.48    1.86
  -6   2   8    5.63    1.90
  -5  -2   7    3.40    1.59
   5   2  -7    7.78    1.97
  -5   2   7    6.31    1.53
  -4  -2   6    2.68    1.37
   4  -2  -6    5.81    1.63
   4  -2  -6    3.84    1.24
  -4   2   6    3.39    1.17
   4   2  -6    5.45    1.53
   3  -2  -5    1.46    0.99
  -3  -2   5    3.93    1.20
   3  -2  -5    4.76    1.22
   3   2  -5    1.22    1.12
  -2  -2   4  311.38    9.53
   2  -2  -4  303.69    9.27
   2  -2  -4  318.76    9.32
   2   2  -4  308.98    9.34
   1  -2  -3    7.51    0.71
   1  -2  -3    6.56    0.72
  -1  -2   3    8.35    1.08
   1   2  -3    6.84    0.80
   0  -2  -2    0.97    0.42
   0  -2  -2    0.31    0.39
   0  -2   2   -0.87    0.61
   0   2  -2    0.87    0.51
  -1  -2  -1   16.83    0.73
  -1  -2  -1   17.07    0.62
   1  -2   1   14.20    0.72
  -1   2  -1   15.47    0.85
   2  -2   0  296.37    8.32
   2   2   0  286.11    8.31
  -2   2   0  276.04    8.33
   3  -2  -1    4.61    0.38
  -3  -2   1    5.95    0.67
   3   2  -1    4.52    0.36
  -4  -2   2    0.68    0.68
   4  -2  -2    0.41    0.36
   4   2  -2    0.03    0.28
  -5  -2   3   49.77    2.07
   5  -2  -3   47.04    1.71
   5   2  -3   46.17    1.57
  -6  -2   4   32.36    1.96
   6  -2  -4   33.21    1.50
   6   2  -4   30.70    1.34
   7  -2  -5    9.86    1.08
  -7  -2   5    9.14    1.42
   7   2  -5    9.37    1.05
  -8  -2   6    1.86    1.47
   8  -2  -6    0.25    1.11
   9  -2  -7   28.50    2.25
  -9  -2   7   32.44    2.48
 -10  -2   8   24.77    2.61
  10  -2  -8   17.79    2.39
 -10   2   8   20.34    2.20
 -11  -2   9   -1.83    2.69
 -11   2   9   -0.14    2.50
  -7  -3   9    7.32    2.22
  -7   3   9    9.26    2.27
  -6  -3   8   11.65    2.02
  -6   3   8   11.64    1.92
   5  -3  -7   11.49    1.70
  -5  -3   7   13.45    1.81
  -5   3   7    9.72    1.55
   5   3  -7   12.12    2.06
   4  -3  -6   47.11    3.18
   4  -3  -6   48.44    2.49
  -4  -3   6   48.93    2.76
   4   3  -6   49.48    2.78
  -3  -3   5   16.76    1.59
   3  -3  -5   17.95    1.33
   3  -3  -5   18.73    1.37
   3   3  -5   24.39    1.55
  -2  -3   4   54.83    2.60
   2  -3  -4   56.76    2.13
   2  -3  -4   57.46    2.10
   2   3  -4   55.81    2.25
  -1  -3   3   24.98    1.68
   1  -3  -3   24.33    1.12
   1  -3  -3   23.86    1.11
   1   3  -3   25.79    1.29
   0  -3  -2    7.11    0.50
   0  -3   2    7.62    0.72
   0  -3  -2    8.14    0.57
   0   3  -2    6.89    0.64
   1  -3   1   14.73    0.75
  -1  -3  -1   14.50    0.74
  -1  -3  -1   15.31    0.61
  -1   3  -1   18.55    0.83
  -2  -3   0    3.21    0.24
   2  -3   0    3.36    0.37
  -2   3   0    3.84    0.40
   2   3   0    3.82    0.36
   3  -3  -1    1.78    0.35
  -3  -3   1    2.84    0.43
   3   3  -1    3.42    0.38
  -4  -3   2   35.94    1.81
   4  -3  -2   42.14    1.40
   4   3  -2   38.52    1.34
  -5  -3   3   15.00    1.31
   5  -3  -3   12.66    0.89
   5   3  -3   14.54    0.79
   6  -3  -4    0.47    0.58
  -6  -3   4    1.21    1.11
   6   3  -4    0.41    0.54
   7  -3  -5    1.57    0.81
  -7  -3   5    2.56    1.36
   7   3  -5    1.02    0.89
  -8  -3   6    2.60    1.62
   8  -3  -6    2.41    1.09
   9  -3  -7   13.56    1.76
  -9  -3   7   14.73    2.13
  10  -3  -8   10.22    2.13
 -10  -3   8   13.64    2.50
 -11  -3   9   -1.66    2.68
 -11   3   9    1.99    2.45
  -7  -4   9    5.46    2.22
  -7   4   9    5.86    2.31
  -6  -4   8    3.60    1.82
   6  -4  -8    5.03    1.86
  -6   4   8    5.08    1.78
   6   4  -8    3.76    2.60
   5  -4  -7    5.40    1.54
  -5  -4   7    5.70    1.67
   5   4  -7    5.78    1.97
   4  -4  -6   67.91    2.96
  -4  -4   6   69.77    3.33
   4   4  -6   70.08    3.11
   3  -4  -5    7.61    1.05
   3  -4  -5    8.58    1.02
  -3  -4   5    7.35    1.46
   3   4  -5    8.67    1.23
   2  -4  -4    0.99    0.63
   2  -4  -4    1.02    0.66
  -2  -4   4    0.95    1.10
   2   4  -4    1.39    0.82
   1  -4  -3   29.26    1.25
  -1  -4   3   30.05    1.72
   1  -4  -3   30.63    1.25
   1   4  -3   30.66    1.44
   0  -4  -2  483.29   13.60
   0  -4   2  448.14   13.70
   0  -4  -2  469.05   13.58
   0   4  -2  470.08   13.66
  -1  -4  -1   13.69    0.63
   1  -4   1   13.12    0.80
   1   4   1   13.75    0.70
  -1   4  -1   15.98    0.81
   2  -4   0    0.43    0.34
  -2  -4   0    0.47    0.24
  -2   4   0    0.13    0.33
   2   4   0    0.88    0.33
   3  -4  -1   44.15    1.50
  -3  -4   1   44.39    1.45
  -3   4   1   43.06    1.42
   3   4  -1   43.63    1.49
   4  -4  -2   23.12    0.99
  -4  -4   2   20.35    1.25
   4   4  -2   23.65    0.97
   5  -4  -3    5.57    0.62
  -5  -4   3    4.61    1.09
   5   4  -3    6.18    0.57
  -6  -4   4    1.72    1.27
   6  -4  -4    0.78    0.58
   6   4  -4    1.05    0.57
   7  -4  -5   47.28    2.08
  -7  -4   5   48.25    2.83
   7   4  -5   46.70    2.00
  -8  -4   6   49.45    3.17
   8  -4  -6   49.92    2.36
   9  -4  -7    4.26    1.49
  -9  -4   7    4.13    1.93
 -10  -4   8   -0.09    2.29
  10  -4  -8    3.32    1.82
  11  -4  -9    3.10    2.57
 -11  -4   9    3.39    2.97
 -11   4   9    6.71    2.52
  -7  -5   9   12.17    2.32
  -7   5   9   10.48    2.49
  -6  -5   8   14.58    2.03
   6  -5  -8   15.66    2.17
   6   5  -8   18.29    2.73
  -6   5   8   22.20    2.22
  -5  -5   7    5.47    1.69
   5  -5  -7    3.56    1.51
   5   5  -7    9.98    2.01
  -4  -5   6   31.28    2.23
   4  -5  -6   31.54    2.07
   4   5  -6   29.48    2.03
  -3  -5   5   12.51    1.60
   3  -5  -5   14.50    1.15
   3  -5  -5   13.17    1.15
   3   5  -5   12.91    1.31
   2  -5  -4   34.76    1.54
   2  -5  -4   33.26    1.56
  -2  -5   4   34.70    2.19
   2   5  -4   35.83    1.78
   1  -5  -3   11.18    0.78
  -1  -5   3   12.99    1.15
   1  -5  -3   12.88    0.82
   1   5  -3   13.19    0.93
   0  -5  -2   18.00    0.85
   0  -5   2   19.00    1.12
   0   5  -2   19.09    1.05
   0   5   2   17.88    0.87
   1  -5   1    5.65    0.56
  -1  -5  -1    4.26    0.41
  -1   5  -1    7.08    0.57
   1   5   1    6.89    0.52
   2  -5   0   25.54    1.05
  -2  -5   0   25.48    0.93
   2   5   0   25.00    1.04
  -2   5   0   26.67    1.05
   3  -5  -1   13.27    0.80
  -3  -5   1   13.81    0.72
   3   5  -1   15.86    0.80
  -3   5   1   15.14    0.74
   4  -5  -2    3.89    0.51
  -4  -5   2    3.47    0.60
   4   5  -2    3.49    0.49
   5  -5  -3    3.58    0.57
  -5  -5   3    3.51    0.95
   5   5  -3    1.92    0.52
  -6  -5   4   19.29    1.70
   6  -5  -4   17.46    1.15
   6   5  -4   20.41    1.19
   7  -5  -5   25.81    1.54
  -7  -5   5   28.26    2.21
   7   5  -5   27.40    1.58
   8  -5  -6    6.46    1.16
  -8  -5   6    4.97    1.93
   8   5  -6    6.21    1.33
   9  -5  -7    0.09    1.28
  -9  -5   7   -1.53    2.06
 -10  -5   8    5.03    2.53
  10  -5  -8    5.26    1.90
 -11  -5   9    6.40    3.20
   7  -6  -9    4.91    2.50
  -7  -6   9    5.52    2.16
  -7   6   9    7.67    2.59
  -6  -6   8    4.98    1.85
   6  -6  -8    5.49    1.96
   6   6  -8    4.39    2.51
  -5  -6   7   14.19    1.90
   5  -6  -7   11.49    1.70
   5   6  -7   15.76    2.09
  -4  -6   6    1.91    1.48
   4  -6  -6    3.30    1.16
   4   6  -6   -0.05    1.32
   3  -6  -5   14.21    1.15
  -3  -6   5   12.24    1.71
  -3   6   5   10.69    1.00
   3   6  -5   13.36    1.34
   2  -6  -4  168.39    5.22
  -2  -6   4  183.94    5.66
   2   6  -4  165.62    5.35
  -2   6   4  158.16    5.11
   1  -6  -3    6.91    0.71
  -1  -6   3    8.99    1.04
  -1   6   3    8.82    0.69
   1   6  -3    9.44    0.86
   0  -6   2    0.48    0.59
   0  -6  -2   -0.61    0.42
   0   6  -2    0.65    0.54
   0   6   2   -0.03    0.43
   1  -6   1   59.35    2.06
  -1  -6  -1   59.28    1.95
   1   6   1   62.08    2.03
  -1   6  -1   61.06    2.07
  -2  -6   0  148.54    4.40
   2  -6   0  151.90    4.50
   2   6   0  144.54    4.48
  -2   6   0  145.31    4.47
   3  -6  -1    8.99    0.68
  -3  -6   1    9.57    0.61
  -3   6   1   10.74    0.66
   3   6  -1   10.08    0.69
   4  -6  -2    1.14    0.47
  -4  -6   2    1.28    0.56
   4   6  -2    0.76    0.47
  -5  -6   3   46.95    2.04
   5  -6  -3   47.76    1.81
   5   6  -3   47.36    1.79
  -6  -6   4   31.09    1.91
   6  -6  -4   28.13    1.47
   6   6  -4   26.99    1.43
  -7  -6   5    6.73    1.61
   7  -6  -5    7.29    0.99
   7   6  -5    8.71    1.03
  -8  -6   6   -0.41    1.84
   8  -6  -6    0.28    1.04
   8   6  -6    0.78    1.21
  -9  -6   7   19.32    2.53
   9  -6  -7   15.93    1.75
  10  -6  -8   15.99    2.12
 -10  -6   8   17.57    2.93
 -11  -6   9   -0.41    3.73
   7  -7  -9    1.19    2.64
  -7  -7   9    5.25    2.30
  -7   7   9    7.07    2.93
   6  -7  -8    5.56    2.04
  -6  -7   8    6.72    2.05
   6   7  -8    3.85    2.51
  -5  -7   7    8.03    1.89
   5  -7  -7    7.04    1.57
   5   7  -7    5.27    1.87
   4  -7  -6   26.45    1.77
  -4  -7   6   28.27    2.26
   4   7  -6   25.99    1.96
   3  -7  -5    7.12    1.06
  -3  -7   5    6.50    1.55
   3   7  -5    7.07    1.25
  -3   7   5    7.22    1.25
  -2  -7   4   31.13    2.19
   2  -7  -4   32.14    1.60
  -2   7   4   30.22    1.48
   2   7  -4   32.70    1.80
  -1  -7   3    9.13    1.06
   1  -7  -3    7.52    0.77
   1   7  -3    8.97    0.93
  -1   7   3    9.62    0.77
   0  -7  -2    1.80    0.51
   0  -7   2    0.70    0.67
   0   7  -2    0.52    0.61
   0   7   2    0.13    0.51
   1  -7   1    8.36    0.76
  -1  -7  -1    8.51    0.62
   1   7   1    9.27    0.70
  -1   7  -1    8.45    0.74
  -2  -7   0    0.72    0.41
   2  -7   0    1.58    0.51
   2   7   0    1.33    0.49
  -2   7   0    0.91    0.53
   3  -7  -1    6.74    0.66
  -3  -7   1    5.64    0.56
   3   7  -1    5.11    0.62
  -3   7   1    4.99    0.59
  -4  -7   2   41.44    1.69
   4  -7  -2   44.11    1.71
   4   7  -2   45.29    1.71
  -4   7   2   45.68    1.62
   5  -7  -3   23.10    1.22
  -5  -7   3   23.61    1.48
   5   7  -3   21.90    1.28
  -6  -7   4    0.46    1.08
   6  -7  -4   -0.25    0.68
   6   7  -4    0.28    0.75
  -7  -7   5    2.23    1.50
   7  -7  -5    3.41    0.90
   7   7  -5    1.68    0.95
  -8  -7   6    4.93    1.99
   8  -7  -6    3.63    1.17
   8   7  -6    6.42    1.34
  -9  -7   7   23.99    2.75
   9  -7  -7   21.29    1.89
  10  -7  -8    6.17    1.92
 -10  -7   8   14.17    3.83
   6  -8  -8    1.55    2.09
  -6  -8   8    4.20    2.16
   6   8  -8    0.60    2.51
   5  -8  -7    4.15    1.60
  -5  -8   7    4.06    1.88
   5   8  -7    7.34    1.95
  -4  -8   6   21.52    2.25
   4  -8  -6   22.55    1.72
   4   8  -6   20.34    1.92
   3  -8  -5   13.14    1.26
  -3  -8   5   16.51    1.85
   3   8  -5   13.44    1.49
  -2  -8   4   -0.88    1.12
   2  -8  -4   -0.01    0.74
  -2   8   4   -0.55    0.75
   2   8  -4   -0.02    0.89
  -1  -8   3   43.56    2.09
   1  -8  -3   42.73    1.76
   1   8  -3   40.28    1.94
  -1   8   3   41.74    1.74
   0  -8   2  139.54    4.45
   0  -8  -2  140.69    4.30
   0   8   2  137.21    4.33
   0   8  -2  137.36    4.43
   1  -8   1   12.19    0.91
  -1  -8  -1   11.95    0.77
  -1   8  -1   10.43    0.89
   1   8   1   14.24    0.90
  -2  -8   0    0.31    0.50
   2  -8   0   -0.11    0.54
  -2   8   0    0.63    0.60
   2   8   0   -0.03    0.54
   3  -8  -1   52.78    1.95
  -3  -8   1   51.99    1.84
  -3   8   1   52.44    1.90
   3   8  -1   48.71    1.92
   4  -8  -2    5.59    0.72
  -4  -8   2    7.21    0.81
   4   8  -2    6.61    0.76
  -4   8   2    6.94    0.74
  -5  -8   3   10.10    1.07
   5  -8  -3    9.64    0.90
   5   8  -3    8.43    0.91
  -6  -8   4    1.33    1.13
   6  -8  -4    0.89    0.81
   6   8  -4    0.88    0.87
   7  -8  -5   21.66    1.50
  -7  -8   5   20.94    1.90
   7   8  -5   25.22    1.55
  -8  -8   6   36.05    2.65
   8  -8  -6   32.59    2.23
   8   8  -6   29.42    2.00
   9  -8  -7    4.44    1.51
  10  -8  -8    0.58    1.91
  -6  -9   8    7.50    2.50
   6  -9  -8    8.64    2.39
   6   9  -8    9.88    2.82
   5  -9  -7    2.48    1.75
  -5  -9   7    2.54    2.32
   5   9  -7    3.72    2.04
  -4  -9   6   13.10    2.21
   4  -9  -6   12.11    1.53
   4   9  -6   10.99    1.75
   3  -9  -5    6.74    1.18
  -3  -9   5    6.49    1.69
   3   9  -5    7.43    1.47
   2  -9  -4    9.35    1.06
  -2  -9   4    9.57    1.45
   2   9  -4   10.63    1.34
  -2   9   4    9.60    1.07
   1  -9  -3    6.01    0.87
  -1  -9   3    4.06    1.09
   1   9  -3    5.42    1.00
  -1   9   3    4.50    0.86
   0  -9   2    8.61    0.97
   0  -9  -2    7.98    0.86
   0   9  -2    9.58    1.00
   0   9   2    9.04    0.90
   1  -9   1    1.30    0.68
  -1  -9  -1    2.78    0.64
   1   9   1    3.74    0.76
  -1   9  -1    5.59    0.84
  -2  -9   0   25.62    1.22
   2   9   0   24.86    1.37
  -2   9   0   22.92    1.40
   3  -9  -1    7.85    0.84
  -3  -9   1    9.47    0.81
  -3   9   1    9.40    0.88
   3   9  -1    9.28    0.92
  -4  -9   2    0.18    0.74
   4  -9  -2    1.30    0.68
  -4   9   2    0.17    0.76
   4   9  -2    0.88    0.68
   5  -9  -3    9.26    1.00
  -5  -9   3   10.31    1.13
   5   9  -3    8.20    1.00
   6  -9  -4   21.54    1.42
  -6  -9   4   19.57    1.60
   6   9  -4   19.63    1.45
   7  -9  -5   28.01    1.71
  -7  -9   5   25.01    2.59
   7   9  -5   27.15    1.74
   8  -9  -6    5.93    1.45
   8   9  -6    6.49    1.58
   9  -9  -7    2.26    1.64
   9   9  -7   -0.64    2.12
   6 -10  -8    1.41    2.55
  -6 -10   8    1.56    3.03
   6  10  -8    2.23    2.92
   5 -10  -7   12.68    2.12
  -5 -10   7   15.00    2.77
   5  10  -7   12.54    2.38
  -4 -10   6    2.69    2.05
   4 -10  -6    2.01    1.48
   4  10  -6   -0.16    1.67
  -3 -10   5   16.68    1.99
   3 -10  -5   14.33    1.50
   3  10  -5   14.32    1.77
  -2 -10   4   43.02    2.67
   2 -10  -4   48.45    2.26
  -2  10   4   44.40    2.20
   2  10  -4   48.42    2.45
   1 -10  -3    9.38    1.05
  -1 -10   3   10.47    1.31
  -1  10   3   10.72    1.11
   1  10  -3    9.81    1.24
   0 -10  -2   -0.98    0.74
   0 -10   2    0.30    0.88
   0  10   2   -0.93    0.81
   0  10  -2    1.14    0.89
   1 -10   1   67.40    2.52
  -1 -10  -1   66.94    2.38
  -1  10  -1   61.46    2.53
   1  10   1   66.32    2.50
  -2 -10   0   39.04    1.69
   2 -10   0   39.95    1.80
  -2  10   0   42.37    1.89
   2  10   0   41.03    1.87
  -3 -10   1   11.13    0.99
   3 -10  -1   11.25    1.03
  -3  10   1   10.60    1.05
   3  10  -1   10.71    1.03
   4 -10  -2    1.56    0.78
  -4 -10   2    0.96    0.92
   4  10  -2    1.10    0.84
  -5 -10   3   33.54    2.21
   5 -10  -3   34.21    1.83
   5  10  -3   31.54    1.84
   6 -10  -4   17.60    1.39
   6  10  -4   13.69    1.37
   7 -10  -5    6.37    1.25
   7  10  -5    5.37    1.33
   8 -10  -6    1.36    1.43
   8  10  -6    0.46    1.67
   9 -10  -7    7.03    1.95
   9  10  -7    6.93    2.47
  -5 -11   7    2.28    2.82
   5 -11  -7    1.12    2.21
   5  11  -7    1.38    2.36
   4 -11  -6    5.00    1.76
  -4 -11   6    8.15    2.43
   4  11  -6    8.28    2.05
   3 -11  -5    2.95    1.40
  -3 -11   5    2.78    1.85
   3  11  -5    2.11    1.55
   2 -11  -4    9.35    1.33
  -2 -11   4    9.64    1.68
   2  11  -4   11.40    1.52
   1 -11  -3    8.12    1.15
  -1 -11   3   10.87    1.40
   1  11  -3   12.24    1.40
  -1  11   3   11.10    1.27
   0 -11   2    1.77    1.01
   0 -11  -2    2.75    0.94
   0  11   2    1.68    1.03
   0  11  -2    1.69    1.05
  -1 -11  -1    1.52    0.85
   1 -11   1    2.46    0.93
  -1  11  -1    2.16    1.04
   1  11   1    2.29    0.98
   2 -11   0    0.17    0.83
  -2 -11   0    1.49    0.85
  -2  11   0    1.44    0.94
   2  11   0    0.62    0.91
   3 -11  -1    4.23    0.91
   3  11  -1    4.46    0.94
  -3  11   1    4.35    1.01
   4 -11  -2   30.55    1.81
   4  11  -2   32.24    1.89
   5 -11  -3   12.26    1.27
   5  11  -3   12.56    1.33
   6 -11  -4    3.04    1.15
   6  11  -4    1.71    1.21
   7 -11  -5    6.24    1.40
   7  11  -5    5.60    1.52
   8 -11  -6    1.69    1.63
   8  11  -6    4.76    1.88
   9  11  -7   14.93    2.93
   5 -12  -7    4.55    2.61
  -5 -12   7    5.15    3.32
  -4 -12   6    3.10    2.72
   4 -12  -6    5.23    2.03
   4  12  -6    3.60    2.20
   3 -12  -5   14.65    1.83
  -3 -12   5   17.13    2.45
   3  12  -5   10.71    1.93
  -2 -12   4    1.14    1.67
   2 -12  -4    0.11    1.33
   2  12  -4   -0.45    1.39
  -1 -12   3   37.87    2.32
   1 -12  -3   38.56    2.25
   1  12  -3   36.02    2.50
  -1  12   3   39.68    2.36
   0 -12   2   38.36    2.23
   0  12   2   39.03    2.21
   0  12  -2   32.64    2.25
   1 -12   1    8.86    1.23
  -1  12  -1    9.67    1.30
   1  12   1   10.75    1.28
   2 -12   0    0.59    0.97
   2  12   0    1.08    1.02
  -2  12   0    0.68    1.05
   3 -12  -1   46.77    2.24
  -3  12   1   46.67    2.39
   3  12  -1   46.03    2.34
   4 -12  -2    4.29    1.10
   4  12  -2    3.89    1.16
   5 -12  -3    6.22    1.27
   5  12  -3    6.72    1.35
   6 -12  -4    2.02    1.30
   6  12  -4    1.72    1.35
   7 -12  -5    7.65    1.64
   7  12  -5    7.98    1.83
   8 -12  -6   13.54    2.06
   8  12  -6   11.79    2.30
  -4 -13   6    4.32    3.17
  -3 -13   5    3.71    2.44
   3  13  -5    4.18    2.09
  -2 -13   4    0.91    1.95
   2  13  -4    0.50    1.65
  -1 -13   3   -0.67    1.55
   1  13  -3   -0.16    1.52
  -1  13   3   -0.06    1.43
   0 -13   2    3.48    1.42
   0  13   2    3.03    1.41
   0  13  -2    3.78    1.44
   1 -13   1    1.84    1.26
   1  13   1    2.40    1.30
  -1  13  -1    2.50    1.38
   2 -13   0   17.77    1.55
   2  13   0   18.19    1.63
  -2  13   0   17.03    1.62
   3 -13  -1    3.00    1.17
   3  13  -1    3.20    1.34
  -3  13   1    2.46    2.09
   4 -13  -2    0.93    1.21
   4  13  -2   -0.48    1.24
   5 -13  -3   12.77    1.57
   5  13  -3   11.80    1.67
   6 -13  -4   12.56    1.72
   6  13  -4   13.68    1.82
   7 -13  -5   12.04    1.99
   7  13  -5   16.31    2.22
  -3 -14   5    6.10    2.92
  -2 -14   4   10.03    2.40
   2  14  -4    6.71    2.04
  -1 -14   3    6.19    1.99
   1  14  -3    5.85    1.79
   0 -14   2    0.66    1.68
   0  14   2    0.62    1.57
   0  14  -2    0.15    1.61
   1 -14   1   37.12    2.37
  -1  14  -1   41.65    2.48
   1  14   1   38.96    2.40
   2 -14   0    9.18    1.58
  -2  14   0    8.42    1.76
   2  14   0    7.35    1.64
   3 -14  -1    6.90    1.51
   3  14  -1    5.41    1.50
   4 -14  -2    1.63    1.45
   4  14  -2    1.40    1.47
   5 -14  -3   15.27    1.85
   5  14  -3   13.75    1.89
   6 -14  -4    9.49    1.92
   6  14  -4    6.45    1.95
  -2 -15   4    5.21    2.76
  -1 -15   3    5.60    2.42
   1  15  -3    5.32    2.17
   0 -15   2    3.20    2.09
   0  15  -2    2.89    1.94
   0  15   2    4.38    1.96
   1 -15   1    0.41    1.77
   1  15   1   -2.51    1.80
  -1  15  -1    2.26    1.88
   2 -15   0    0.99    1.70
  -2  15   0    3.40    1.91
   2  15   0    0.62    1.81
   3 -15  -1    3.89    1.77
   3  15  -1    4.51    1.74
   4 -15  -2   18.49    2.12
   4  15  -2   19.86    2.20
   5 -15  -3    5.55    1.97
   0 -16   2    4.54    2.86
   1 -16   1    3.01    2.27
  -1  16  -1    5.77    2.35
   1  16   1    4.41    2.16
   2 -16   0    0.84    2.20
   2  16   0   -0.29    2.29
   3 -16  -1   20.28    2.43
  -7   0  10    0.48    2.59
  -6   0   9    4.70    2.17
  -5   0   8    1.85    1.83
  -4   0   7    3.70    1.59
   4   0  -7    1.51    1.84
  -3   0   6   29.43    2.01
   3   0  -6   28.46    2.02
   2   0  -5    0.32    1.21
  -2   0   5    0.55    1.04
   1   0  -4   -1.18    0.96
  -1   0   4    0.16    0.88
   0   0   3  261.78    7.93
   0   0  -3  261.16    7.93
   1   0   2    7.01    0.82
  -1   0  -2    5.72    0.80
  -2   0  -1    5.39    0.58
   2   0   1    3.83    0.36
  -3   0   0   15.35    0.70
   3   0   0   16.18    0.58
  -4   0   1  973.94   27.84
   4   0  -1  961.71   27.88
   5   0  -2    4.88    0.51
   6   0  -3    2.96    0.61
   7   0  -4    3.21    0.86
   8   0  -5   57.90    2.72
   9   0  -6    7.78    1.69
  -9   0   6    8.98    1.45
 -10   0   7    5.49    1.66
 -11   0   8   12.21    2.42
 -12   0   9    5.00    2.99
  -7  -1  10   10.50    2.65
  -7   1  10    8.09    2.78
  -6  -1   9    0.44    2.02
  -6   1   9    3.92    2.21
  -5  -1   8   22.72    2.27
  -5   1   8   16.77    2.18
  -4  -1   7    0.53    1.45
   4  -1  -7    2.60    1.94
   4   1  -7    2.75    1.81
  -4   1   7    2.24    1.53
  -3  -1   6   24.05    1.83
   3  -1  -6   25.91    2.03
   3   1  -6   19.90    1.90
  -3   1   6   23.07    1.79
   2  -1  -5   40.92    2.25
  -2  -1   5   36.81    2.21
   2   1  -5   32.78    2.24
  -2   1   5   32.94    2.05
  -1  -1   4   12.92    1.30
   1  -1  -4   12.62    1.25
   1   1  -4   12.21    1.25
  -1   1   4   14.32    1.16
   0  -1   3   50.11    2.19
   0  -1  -3   47.95    2.00
   0   1  -3   48.04    2.09
   0   1   3   46.30    1.93
  -1  -1  -2    4.51    0.63
   1  -1   2    2.97    0.69
  -1   1  -2    4.35    0.82
   1   1   2    2.64    0.70
   2  -1   1   60.82    1.87
  -2  -1  -1   61.50    1.94
  -2   1  -1   59.22    2.13
   2   1   1   57.38    1.88
   3  -1   0    6.46    0.39
  -3  -1   0    6.12    0.43
  -3   1   0    8.69    0.60
   4  -1  -1   58.65    1.85
   4   1  -1   57.38    1.81
   4   1  -1   60.96    1.86
   5  -1  -2    9.63    0.58
   5   1  -2    7.16    0.48
   5   1  -2    7.19    0.67
   6  -1  -3   86.17    2.78
   6   1  -3   82.77    2.94
   7  -1  -4   11.04    0.98
   7   1  -4   12.84    1.28
   8  -1  -5   51.89    2.37
  -8  -1   5   50.09    2.50
   8   1  -5   57.82    2.87
   9  -1  -6    6.73    1.47
  -9  -1   6    7.87    1.54
  10  -1  -7   13.75    2.03
 -10  -1   7   18.01    2.15
 -10   1   7   18.00    1.95
 -11  -1   8    3.63    2.37
 -11   1   8    7.53    2.23
 -12  -1   9    1.07    3.01
 -12   1   9    0.34    2.75
  -7  -2  10   -1.95    2.46
  -7   2  10    1.32    2.80
  -6  -2   9    3.63    2.03
  -6   2   9    5.51    2.28
  -5  -2   8   12.85    1.95
  -5   2   8   10.55    2.04
   5   2  -8    9.82    2.75
  -4  -2   7    1.90    1.44
   4   2  -7    2.39    1.88
  -4   2   7    1.19    1.48
   3  -2  -6   -0.81    1.50
  -3  -2   6    0.64    1.26
  -3   2   6    2.42    1.24
   3   2  -6    0.97    1.51
  -2  -2   5   28.58    1.85
   2  -2  -5   29.47    1.84
  -2   2   5   28.42    1.75
   2   2  -5   28.45    1.87
   1  -2  -4   30.28    1.67
  -1  -2   4   33.81    1.97
   1  -2  -4   29.29    1.75
  -1   2   4   29.64    1.58
   1   2  -4   31.96    1.87
   0  -2  -3    3.30    0.72
   0  -2  -3    2.40    0.69
   0  -2   3    4.83    0.96
   0   2  -3    2.71    0.82
   1  -2   2    7.49    0.74
  -1  -2  -2    8.34    0.65
  -1  -2  -2    8.41    0.67
  -1   2  -2    9.07    0.82
  -2  -2  -1  873.06   24.87
   2  -2   1  884.67   24.86
   2   2   1  849.97   24.81
  -2   2  -1  838.41   24.96
   3  -2   0    7.06    0.45
  -3  -2   0    6.69    0.47
  -3   2   0    8.10    0.71
  -4  -2   1    0.90    0.57
   4  -2  -1    1.01    0.31
   4   2  -1    0.08    0.29
   5  -2  -2    8.31    0.59
  -5  -2   2    8.48    0.85
   5   2  -2    8.86    0.55
  -6  -2   3  386.37   11.46
   6  -2  -3  390.76   11.31
   6   2  -3  376.69   11.17
  -7  -2   4    0.72    1.01
   7  -2  -4    0.76    0.64
   7   2  -4    0.83    0.54
   8  -2  -5    6.66    1.04
  -8  -2   5    3.63    1.33
   9  -2  -6   12.40    1.52
  -9  -2   6   18.28    1.99
  10  -2  -7   -0.95    1.60
 -10  -2   7   -1.85    1.95
  11  -2  -8    8.56    2.29
 -11  -2   8   11.36    2.61
 -11   2   8   10.51    2.12
 -12  -2   9   -1.38    3.10
 -12   2   9   -0.41    2.66
  -7  -3  10   10.23    3.39
  -7   3  10    7.88    3.47
  -6  -3   9    8.96    2.22
  -6   3   9    5.12    2.40
  -5  -3   8   22.54    2.21
   5   3  -8   26.70    2.82
  -5   3   8   24.55    2.41
  -4  -3   7   12.12    1.77
   4   3  -7   13.99    2.11
  -4   3   7   12.49    1.74
  -3  -3   6   17.45    1.73
   3  -3  -6   14.47    1.56
   3  -3  -6   14.32    1.72
  -3   3   6   11.49    1.43
   3   3  -6   11.75    1.70
   2  -3  -5   10.04    1.25
  -2  -3   5    8.86    1.38
   2  -3  -5   11.06    1.19
   2   3  -5    8.70    1.34
   1  -3  -4    5.46    0.88
  -1  -3   4    9.35    1.25
   1  -3  -4    5.92    0.86
   1   3  -4    6.09    1.06
   0  -3  -3   88.63    2.82
   0  -3   3   80.63    3.10
   0  -3  -3   86.78    2.82
   0   3  -3   90.46    3.01
  -1  -3  -2   14.13    0.75
   1  -3   2   13.94    0.90
  -1  -3  -2   12.43    0.83
  -1   3  -2   12.71    0.91
   2  -3   1   40.15    1.39
  -2  -3  -1   39.36    1.24
  -2  -3  -1   39.41    1.38
  -2   3  -1   37.84    1.53
   3  -3   0    6.34    0.50
   3   3   0    8.10    0.51
  -3   3   0    7.91    0.64
   4  -3  -1   51.01    1.71
   4   3  -1   52.98    1.69
   5  -3  -2   12.47    0.76
  -5  -3   2   14.08    1.11
   5   3  -2   14.01    0.71
  -6  -3   3   61.55    2.85
   6  -3  -3   72.63    2.38
   6   3  -3   73.50    2.27
  -7  -3   4    8.62    1.40
   7  -3  -4    6.28    0.79
   7   3  -4    7.35    0.73
  -8  -3   5   58.68    3.10
   8  -3  -5   58.95    2.36
   8   3  -5   56.58    2.30
  -9  -3   6    8.05    1.90
   9  -3  -6    8.56    1.33
 -10  -3   7    9.86    2.24
  10  -3  -7   12.09    1.84
  11  -3  -8    5.26    2.03
 -11  -3   8    2.64    2.57
 -12  -3   9    2.30    3.23
 -12   3   9    2.45    3.00
  -6  -4   9    1.24    1.97
  -6   4   9    1.41    2.27
  -5  -4   8    0.70    1.71
  -5   4   8    3.77    1.91
   5   4  -8    4.81    2.54
   4  -4  -7    1.65    1.56
  -4  -4   7    2.00    1.52
  -4   4   7    4.27    1.52
   4   4  -7    4.98    1.95
  -3  -4   6   36.46    2.51
   3  -4  -6   29.30    1.94
   3  -4  -6   29.98    1.96
   3   4  -6   31.46    2.19
   2  -4  -5    0.05    0.91
  -2  -4   5    1.43    1.25
   2  -4  -5    1.40    0.98
   2   4  -5    0.45    1.17
   1  -4  -4    0.77    0.72
  -1  -4   4    0.40    1.07
   1  -4  -4   -0.74    0.65
   1   4  -4   -1.06    0.92
   0  -4  -3  267.13    7.83
   0  -4  -3  264.85    7.85
   0  -4   3  254.28    8.06
   0   4  -3  270.07    8.00
   1  -4   2   30.44    1.34
  -1  -4  -2   30.86    1.25
  -1  -4  -2   30.23    1.14
  -1   4  -2   30.40    1.41
  -2  -4  -1    1.50    0.29
   2  -4   1    1.81    0.44
  -2   4  -1    3.35    0.57
   2   4   1    2.65    0.43
   3  -4   0   19.35    0.93
  -3   4   0   22.90    1.04
   3   4   0   23.70    0.94
   4  -4  -1  812.92   23.21
  -4  -4   1  775.27   23.11
   4   4  -1  818.05   23.19
  -5  -4   2   10.27    0.89
   5  -4  -2   11.37    0.75
   5   4  -2   10.81    0.73
   6  -4  -3    2.77    0.56
  -6  -4   3    0.44    1.10
   6   4  -3    1.37    0.47
  -7  -4   4   11.77    1.64
   7  -4  -4    8.06    0.85
   7   4  -4   11.41    0.83
   8  -4  -5   52.06    2.28
  -8  -4   5   55.06    3.17
   8   4  -5   54.54    2.16
  -9  -4   6    5.01    1.97
   9  -4  -6    2.65    1.12
 -10  -4   7    0.11    2.24
  10  -4  -7    3.90    1.46
  11  -4  -8    9.11    2.19
 -11  -4   8    4.28    2.72
 -12  -4   9    5.87    3.53
  -6  -5   9   -0.32    1.92
  -6   5   9    0.13    2.43
   5  -5  -8    5.10    1.96
  -5  -5   8    4.82    1.76
   5   5  -8    4.70    2.55
  -5   5   8    4.95    1.91
   4  -5  -7    5.25    1.61
  -4  -5   7    4.60    1.57
   4   5  -7    3.23    1.90
   3  -5  -6   23.50    1.75
  -3  -5   6   26.33    2.02
   3  -5  -6   26.90    2.18
   3   5  -6   27.73    2.02
   2  -5  -5   56.80    2.39
   2  -5  -5   60.18    2.42
  -2  -5   5   57.15    2.93
   2   5  -5   60.06    2.72
  -1  -5   4    5.66    1.25
   1  -5  -4    7.89    0.87
   1  -5  -4    5.53    0.82
   1   5  -4    4.56    1.06
   0  -5  -3   15.30    0.94
   0  -5   3   15.03    1.22
   0  -5  -3   14.99    0.98
   0   5  -3   14.73    1.08
   1  -5   2    0.41    0.55
  -1  -5  -2    0.52    0.40
   1   5   2    1.75    0.48
  -1   5  -2    0.83    0.62
   2  -5   1   51.43    1.78
  -2  -5  -1   49.87    1.61
   2   5   1   50.58    1.73
  -2   5  -1   49.21    1.82
  -3  -5   0   11.21    0.55
   3  -5   0   12.61    0.79
   3   5   0   10.30    0.66
  -3   5   0   11.04    0.72
  -4  -5   1   41.09    1.37
   4  -5  -1   40.17    1.50
   4   5  -1   42.44    1.49
  -4   5   1   40.65    1.48
   5  -5  -2    0.38    0.46
  -5  -5   2    0.85    0.57
   5   5  -2    0.13    0.42
   6  -5  -3   50.25    1.78
  -6  -5   3   46.20    2.18
   6   5  -3   45.23    1.72
  -7  -5   4   16.60    1.73
   7  -5  -4   13.80    1.03
   7   5  -4   17.48    1.13
  -8  -5   5   32.17    2.43
   8  -5  -5   31.63    1.78
   8   5  -5   33.94    1.68
  -9  -5   6    3.13    2.11
   9  -5  -6    4.63    1.14
 -10  -5   7   11.45    2.60
  10  -5  -7   11.89    1.66
  11  -5  -8    8.12    2.09
 -11  -5   8    7.76    2.97
  -6  -6   9    9.28    2.27
  -6   6   9    4.75    2.64
   5  -6  -8    8.90    2.19
  -5  -6   8   11.12    2.04
   5   6  -8    6.62    2.65
  -5   6   8    9.80    2.23
   4  -6  -7    1.09    1.51
  -4  -6   7   -0.03    1.56
   4   6  -7    0.54    1.81
   3  -6  -6    1.86    1.19
  -3  -6   6    0.50    1.49
   3   6  -6    0.84    1.46
  -2  -6   5    8.75    1.58
   2  -6  -5   12.17    1.19
   2  -6  -5   11.35    1.18
   2   6  -5   11.17    1.43
   1  -6  -4   48.05    2.00
   1  -6  -4   47.64    1.98
  -1  -6   4   48.88    2.56
   1   6  -4   50.84    2.27
   0  -6   3    2.00    0.86
   0  -6  -3    2.23    0.59
   0   6  -3    4.86    0.85
   0   6   3    3.00    0.62
  -1  -6  -2    5.41    0.56
   1  -6   2    5.88    0.76
   1   6   2    5.97    0.62
  -1   6  -2    6.60    0.78
  -2  -6  -1  427.55   12.16
   2  -6   1  408.49   12.30
  -2   6  -1  421.42   12.30
   2   6   1  417.32   12.26
  -3  -6   0   29.75    1.08
   3  -6   0   30.18    1.26
  -3   6   0   29.26    1.28
   3   6   0   30.14    1.24
  -4  -6   1   -0.15    0.39
   4  -6  -1    0.34    0.46
   4   6  -1    0.90    0.46
  -4   6   1    0.21    0.50
   5  -6  -2   14.05    0.93
  -5  -6   2   14.63    0.98
   5   6  -2   16.01    0.97
   6  -6  -3  204.19    6.11
  -6  -6   3  197.49    6.18
   6   6  -3  197.45    6.04
   7  -6  -4    2.15    0.71
  -7  -6   4    1.78    1.24
   7   6  -4    2.34    0.74
  -8  -6   5    1.40    1.62
   8  -6  -5    3.41    0.90
   8   6  -5    1.84    0.90
   9  -6  -6    9.04    1.28
  -9  -6   6    9.07    2.22
 -10  -6   7    8.14    2.84
  10  -6  -7    8.07    1.58
  11  -6  -8    5.63    1.98
  -6  -7   9   12.03    2.50
   6  -7  -9    6.92    2.84
   6   7  -9   12.70    3.76
  -6   7   9   12.74    3.10
   5  -7  -8   25.28    2.57
  -5  -7   8   27.70    2.54
   5   7  -8   21.16    2.93
  -4  -7   7   16.21    2.13
   4  -7  -7   19.30    1.97
   4   7  -7   15.93    2.15
  -3  -7   6    3.97    1.66
   3  -7  -6    2.52    1.26
   3   7  -6    1.61    1.52
   2  -7  -5    0.55    1.00
  -2  -7   5    0.29    1.49
  -2   7   5    0.78    0.90
   2   7  -5    1.70    1.24
   1  -7  -4    7.78    0.93
  -1  -7   4    7.20    1.35
  -1   7   4    6.22    0.84
   1   7  -4    6.48    1.17
   0  -7  -3   75.01    2.60
   0  -7   3   84.12    2.93
   0   7   3   74.26    2.61
   0   7  -3   74.60    2.83
  -1  -7  -2    7.74    0.65
   1  -7   2    8.79    0.88
  -1   7  -2    4.90    0.80
   1   7   2    5.50    0.69
   2  -7   1   12.67    0.87
  -2  -7  -1   13.14    0.79
  -2   7  -1   12.21    0.92
   2   7   1   12.16    0.84
   3  -7   0    3.44    0.62
  -3  -7   0    2.83    0.46
   3   7   0    3.32    0.59
  -3   7   0    3.16    0.63
   4  -7  -1   11.23    0.85
  -4  -7   1   12.04    0.72
   4   7  -1   11.58    0.80
  -4   7   1   10.86    0.81
  -5  -7   2   10.48    0.81
   5  -7  -2   10.47    0.81
   5   7  -2    9.24    0.81
   6  -7  -3   34.37    1.54
  -6  -7   3   34.34    1.77
   6   7  -3   34.59    1.56
   7  -7  -4    5.95    0.90
  -7  -7   4    5.79    1.25
   7   7  -4    4.83    0.87
  -8  -7   5   30.08    2.17
   8  -7  -5   27.59    1.74
   8   7  -5   25.87    1.77
   9  -7  -6   10.36    1.39
   9   7  -6   13.04    1.55
  10  -7  -7    4.05    1.51
  11  -7  -8    0.49    1.96
   6  -8  -9    0.98    3.02
   6   8  -9    0.66    3.75
  -6   8   9    3.14    3.30
   5  -8  -8    0.58    2.24
  -5  -8   8    1.21    2.03
   5   8  -8    0.29    2.54
   4  -8  -7    4.65    1.77
  -4  -8   7    4.19    1.95
   4   8  -7    7.82    2.06
   3  -8  -6   26.88    1.89
  -3  -8   6   22.32    2.31
   3   8  -6   22.48    2.09
   2  -8  -5   -0.22    1.02
  -2  -8   5   -0.40    1.54
   2   8  -5   -1.11    1.26
  -2   8   5    1.53    1.00
   1  -8  -4    0.60    0.85
  -1  -8   4    2.89    1.27
  -1   8   4    0.53    0.82
   1   8  -4   -0.08    1.05
   0  -8   3   65.16    2.67
   0  -8  -3   64.62    2.36
   0   8  -3   65.75    2.61
   0   8   3   65.90    2.39
  -1  -8  -2   41.99    1.64
   1  -8   2   42.03    1.87
   1   8   2   43.10    1.75
  -1   8  -2   41.19    1.89
   2  -8   1    2.32    0.67
  -2  -8  -1    3.47    0.59
   2   8   1    4.62    0.70
  -2   8  -1    2.76    0.75
   3  -8   0   18.08    1.12
  -3  -8   0   16.37    0.94
   3   8   0   16.65    1.02
  -3   8   0   16.97    1.06
  -4  -8   1  245.18    7.37
   4  -8  -1  250.42    7.53
   4   8  -1  247.05    7.50
  -4   8   1  253.33    7.46
   5  -8  -2   18.13    1.17
  -5  -8   2   18.34    1.07
   5   8  -2   17.00    1.09
   6  -8  -3    0.52    0.70
  -6  -8   3    1.09    0.99
   6   8  -3   -0.14    0.71
   7  -8  -4   13.96    1.18
   7   8  -4   13.61    1.18
   8  -8  -5   24.45    1.60
   8   8  -5   26.95    1.67
   9  -8  -6    1.18    1.20
   9   8  -6    2.39    1.46
  10  -8  -7    1.23    1.52
   5  -9  -8    3.11    2.54
  -5  -9   8    1.70    2.51
   5   9  -8    0.90    2.73
   4  -9  -7    9.80    2.00
  -4  -9   7    9.40    2.37
   4   9  -7    6.86    2.20
  -3  -9   6   16.34    2.35
   3  -9  -6   17.76    1.81
   3   9  -6   15.25    1.99
   2  -9  -5   43.65    2.46
  -2  -9   5   46.88    3.12
   2   9  -5   47.37    2.73
  -1  -9   4    6.75    1.42
   1  -9  -4    5.67    1.03
   1   9  -4    4.61    1.29
  -1   9   4    5.05    1.01
   0  -9  -3    0.92    0.81
   0  -9   3    0.88    1.07
   0   9   3    0.61    0.82
   0   9  -3    0.99    1.00
  -1  -9  -2    1.75    0.72
   1  -9   2    2.42    0.89
  -1   9  -2    1.47    0.88
   1   9   2    2.34    0.80
   2  -9   1   28.48    1.54
  -2  -9  -1   28.83    1.36
  -2   9  -1   29.81    1.63
   2   9   1   29.93    1.52
  -3  -9   0    5.07    0.69
   3  -9   0    5.06    0.79
   3   9   0    3.60    0.74
  -3   9   0    5.20    0.82
   4  -9  -1   16.02    1.12
  -4   9   1   19.16    1.19
   4   9  -1   17.19    1.12
   5  -9  -2    2.55    0.74
   5   9  -2    2.11    0.78
   6  -9  -3   18.16    1.25
   6   9  -3   16.91    1.23
   7  -9  -4    7.91    1.13
   7   9  -4    9.26    1.16
   8  -9  -5   12.04    1.35
   8   9  -5   11.03    1.38
   9  -9  -6    4.56    1.44
   9   9  -6    3.92    1.64
  10  -9  -7    7.47    1.88
  -5 -10   8    2.24    2.91
   5 -10  -8    3.31    2.82
   5  10  -8    6.08    3.02
   4 -10  -7   -0.13    2.11
  -4 -10   7    1.47    2.40
   4  10  -7   -0.74    2.13
  -3 -10   6    1.25    2.08
   3 -10  -6    0.36    1.58
   3  10  -6    1.34    1.79
   2 -10  -5    1.98    1.41
  -2 -10   5    1.49    1.79
   2  10  -5    2.95    1.47
   1 -10  -4   40.86    2.14
  -1 -10   4   35.91    2.39
  -1  10   4   39.24    2.14
   1  10  -4   41.28    2.49
   0 -10   3    1.42    1.15
   0 -10  -3    0.10    0.95
   0  10  -3    2.53    1.11
   0  10   3    2.63    0.99
   1 -10   2    6.26    1.06
  -1 -10  -2    7.12    0.98
   1  10   2    4.82    0.97
  -1  10  -2    4.62    1.06
   2 -10   1  110.96    3.77
   2  10   1  106.58    3.68
  -2  10  -1  110.96    3.78
   3 -10   0   34.09    1.70
  -3  10   0   30.02    1.71
   3  10   0   31.23    1.70
   4 -10  -1   -1.21    0.71
   4  10  -1    0.19    0.79
  -4  10   1    0.20    0.93
   5 -10  -2   17.11    1.26
   5  10  -2   20.25    1.32
   6 -10  -3   64.24    2.66
   6  10  -3   66.93    2.68
   7 -10  -4    1.83    1.08
   7  10  -4    3.17    1.18
   8 -10  -5    2.22    1.19
   8  10  -5    0.75    1.30
   9 -10  -6    9.41    1.65
   9  10  -6   10.67    1.94
   4 -11  -7   15.99    2.84
  -4 -11   7   15.98    3.00
   4  11  -7   10.94    2.73
   3 -11  -6    4.25    1.94
  -3 -11   6    4.18    2.40
   3  11  -6    2.52    2.00
  -2 -11   5    3.40    1.92
   2 -11  -5    2.40    1.91
   2  11  -5    2.82    1.63
  -1 -11   4   -0.54    1.48
   1  11  -4    0.92    1.41
  -1  11   4    0.24    1.26
   0 -11   3   37.43    2.46
   0  11  -3   41.84    2.43
   0  11   3   38.94    2.19
   1 -11   2    6.08    1.18
  -1  11  -2    6.63    1.30
   1  11   2    4.10    1.10
   2 -11   1    3.68    1.02
   2  11   1    3.28    1.03
  -2  11  -1    3.61    1.12
   3 -11   0    7.20    1.06
  -3  11   0    6.52    1.11
   3  11   0    8.98    1.15
   4 -11  -1    2.87    0.95
  -4  11   1    2.97    1.05
   4  11  -1    2.15    1.02
   5 -11  -2    4.76    1.04
   5  11  -2    5.75    1.09
   6 -11  -3    6.54    1.18
   6  11  -3    7.12    1.23
   7 -11  -4    4.72    1.26
   7  11  -4    2.57    1.28
   8 -11  -5   13.59    1.62
   8  11  -5   11.92    1.71
   9 -11  -6    6.57    1.78
   9  11  -6    8.75    2.19
  -4 -12   7    5.70    5.76
  -3 -12   6   15.66    2.96
   3  12  -6   14.66    2.45
  -2 -12   5    3.41    2.18
   2  12  -5    0.66    1.83
  -1 -12   4    0.52    1.69
   1  12  -4   -0.58    1.58
   0 -12   3    8.66    1.61
   0  12   3   10.06    1.46
   0  12  -3    7.82    1.60
   1 -12   2   36.89    2.35
  -1  12  -2   39.93    2.41
   1  12   2   36.67    2.30
   2 -12   1    0.64    1.10
  -2  12  -1    1.81    1.24
   2  12   1    1.21    1.19
   3 -12   0   14.41    1.39
  -3  12   0   15.31    1.48
   3  12   0   16.24    1.48
   4 -12  -1   62.08    2.68
   4  12  -1   61.38    2.72
   5 -12  -2   16.16    1.44
   5  12  -2   14.31    1.49
   6 -12  -3   -0.13    1.15
   6  12  -3   -0.35    1.20
   7 -12  -4   12.86    1.64
   7  12  -4   12.43    1.73
   8 -12  -5    9.36    1.75
   8  12  -5    9.89    1.92
   9  12  -6   -0.76    2.60
  -3 -13   6    2.78    3.06
  -2 -13   5   22.13    2.82
   2  13  -5   17.38    2.47
  -1 -13   4    3.85    2.05
   1  13  -4    5.03    1.90
   0 -13   3    0.98    1.60
   0  13   3   -0.92    1.55
   0  13  -3    0.44    1.59
   1 -13   2    6.44    1.54
   1  13   2    4.58    1.49
  -1  13  -2    2.99    1.58
   2 -13   1   12.74    1.59
  -2  13  -1   13.51    1.74
   2  13   1   12.59    1.58
   3 -13   0    0.79    1.17
  -3  13   0    1.78    1.47
   3  13   0    0.81    1.29
   4 -13  -1    2.42    1.24
   4  13  -1    2.43    1.28
   5 -13  -2    3.20    1.33
   5  13  -2    3.79    1.35
   6 -13  -3    6.01    1.46
   6  13  -3    6.14    1.50
   7 -13  -4    5.76    1.62
   7  13  -4    4.98    1.78
  -2 -14   5    4.90    2.90
  -1 -14   4   23.41    2.71
   1  14  -4   21.65    2.58
   0 -14   3   -1.29    1.92
   0  14   3    1.52    1.81
   0  14  -3    4.17    1.97
   1 -14   2    3.04    1.78
   1  14   2    2.39    1.64
  -1  14  -2    2.17    1.79
   2 -14   1   14.24    1.82
   2  14   1   18.83    1.96
  -2  14  -1   14.93    1.94
   3 -14   0   19.80    1.83
   3  14   0   18.82    1.83
  -3  14   0   16.52    2.20
   4 -14  -1   -1.21    1.41
   4  14  -1   -0.30    1.42
   5 -14  -2   13.29    1.75
   5  14  -2   12.89    1.76
   6 -14  -3   17.17    1.92
   6  14  -3    9.60    1.94
  -1 -15   4    3.75    3.64
   0 -15   3   14.92    2.62
   0  15  -3   14.24    2.58
   1 -15   2    2.76    2.11
   1  15   2    3.29    1.98
  -1  15  -2    2.18    2.10
   2 -15   1    2.02    1.80
   2  15   1    2.35    1.87
  -2  15  -1    0.65    1.99
   3 -15   0    7.57    1.87
   3  15   0    4.01    1.84
   4 -15  -1   -0.34    1.68
   4  15  -1    0.06    1.77
   5 -15  -2   -1.38    1.80
   5  15  -2    0.12    2.71
   2 -16   1    1.51    3.41
  -2  16  -1    0.68    2.50
  -6   0  10   -0.48    2.47
  -5   0   9    1.19    2.10
   4   0  -8   33.87    3.91
  -4   0   8   29.71    2.54
  -3   0   7    5.80    1.64
   3   0  -7    2.62    1.75
  -2   0   6    4.39    1.37
   2   0  -6    5.54    1.56
  -1   0   5    0.27    1.08
   1   0  -5   -0.11    1.20
   0   0  -4  181.44    5.88
   0   0   4  184.97    5.85
  -1   0  -3   22.93    1.57
   1   0   3   21.92    1.53
  -2   0  -2    0.12    0.74
   2   0   2   -0.52    0.57
  -3   0  -1    6.70    0.67
   3   0   1    6.50    0.41
  -4   0   0    2.01    0.40
   4   0   0    1.94    0.28
  -5   0   1    0.49    0.31
   5   0  -1    0.51    0.33
   6   0  -2    0.42    0.41
   7   0  -3   42.97    1.74
   8   0  -4  131.50    4.35
   9   0  -5    0.73    1.17
  10   0  -6    8.76    1.78
 -10   0   6   11.14    1.60
 -11   0   7    3.41    1.83
 -12   0   8    4.24    2.44
 -13   0   9    9.90    3.48
  -6  -1  10    5.46    2.55
  -6   1  10   14.72    3.00
  -5  -1   9    4.33    2.07
  -5   1   9    4.60    2.28
  -4  -1   8   27.71    2.40
   4   1  -8   26.24    2.60
  -4   1   8   26.65    2.45
  -3  -1   7   32.19    2.27
   3  -1  -7   33.80    2.44
   3   1  -7   28.23    2.33
  -3   1   7   32.81    2.36
   2  -1  -6   20.48    1.91
  -2  -1   6   19.44    1.74
   2   1  -6   22.36    1.90
  -2   1   6   23.36    1.84
  -1  -1   5   56.03    2.54
   1  -1  -5   48.20    2.59
   1   1  -5   51.99    2.60
  -1   1   5   49.38    2.45
   0  -1  -4   10.38    1.23
   0  -1   4   10.75    1.22
   0   1   4    9.03    1.13
   0   1  -4    9.57    1.22
   1  -1   3   52.57    2.18
  -1  -1  -3   52.45    2.11
   1   1   3   47.39    2.08
  -1   1  -3   47.23    2.20
   2  -1   2   12.80    0.81
  -2  -1  -2   11.77    0.87
   2   1   2   11.25    0.88
  -2   1  -2   12.86    1.09
  -3  -1  -1   23.42    1.04
   3  -1   1   21.73    0.90
  -3   1  -1   21.11    1.27
   3   1   1   23.64    0.81
   4  -1   0   14.64    0.68
  -4  -1   0   15.83    0.77
  -4   1   0   15.27    0.88
   4   1   0   15.83    0.58
   5  -1  -1    5.21    0.46
   5   1  -1    5.69    0.45
   5   1  -1    5.96    0.41
   6  -1  -2   26.57    1.11
   6   1  -2   29.16    1.25
   6   1  -2   27.02    0.99
   7  -1  -3    8.81    0.75
   7   1  -3    9.23    0.96
   8  -1  -4   26.83    1.54
   8   1  -4   25.45    1.69
   9  -1  -5    5.28    1.18
  -9  -1   5    4.56    1.29
   9   1  -5    7.01    1.52
  10  -1  -6   28.31    2.16
 -10  -1   6   27.32    2.17
 -11  -1   7    7.93    2.13
  11  -1  -7    5.47    2.01
 -11   1   7    7.24    1.77
 -12  -1   8   15.25    2.90
 -12   1   8   16.10    2.55
 -13  -1   9    1.75    3.50
 -13   1   9    2.96    3.90
  -6  -2  10    1.01    2.50
  -6   2  10    3.35    2.77
  -5  -2   9   -3.80    1.89
  -5   2   9   -0.31    2.20
  -4  -2   8    1.59    1.71
   4   2  -8    4.90    2.27
  -4   2   8   -0.79    1.80
  -3  -2   7    2.70    1.47
   3  -2  -7    1.87    1.96
  -3   2   7    4.36    1.67
   3   2  -7    1.71    1.76
  -2  -2   6   92.23    3.73
   2  -2  -6   92.57    3.84
   2   2  -6   96.11    3.88
  -2   2   6   86.95    3.61
  -1  -2   5   17.09    1.58
   1  -2  -5   14.09    1.53
   1   2  -5   13.41    1.59
  -1   2   5   14.66    1.39
   0  -2  -4   -0.21    0.98
   0  -2   4    2.80    1.10
   0   2   4    1.27    0.88
   0   2  -4    2.27    1.09
   1  -2   3    3.20    0.88
  -1  -2  -3    4.22    0.76
  -1   2  -3    2.44    1.02
   1   2   3    2.12    0.78
  -2  -2  -2   50.28    1.80
   2  -2   2   49.09    1.81
  -2   2  -2   48.87    2.10
   2   2   2   48.66    1.85
   3  -2   1   18.93    0.84
  -3  -2  -1   17.09    0.90
  -3   2  -1   16.28    1.13
   4  -2   0    0.28    0.33
  -4  -2   0    0.58    0.37
  -4   2   0    0.61    0.61
   5  -2  -1   32.99    1.17
   5   2  -1   34.47    1.14
   5   2  -1   26.45    1.29
   6  -2  -2  127.90    3.95
  -6  -2   2  130.83    4.08
   6   2  -2  130.04    3.86
   6   2  -2  126.96    4.14
  -7  -2   3   12.37    1.15
   7  -2  -3    9.10    0.76
   7   2  -3   10.57    0.64
   8  -2  -4    5.45    0.85
  -8  -2   4    3.26    1.20
   8   2  -4    5.68    0.65
   9  -2  -5   21.05    1.52
  -9  -2   5   22.09    1.92
 -10  -2   6   48.29    2.90
  10  -2  -6   45.16    2.63
  11  -2  -7    2.36    1.74
 -11  -2   7   -0.10    2.17
  12  -2  -8    8.71    2.49
 -12  -2   8    5.03    2.88
 -12   2   8    4.43    2.25
 -13  -2   9   -0.97    3.64
  -6  -3  10   10.96    3.34
  -6   3  10    8.39    3.07
  -5  -3   9    7.16    2.03
  -5   3   9    6.56    2.45
  -4  -3   8   15.04    2.00
   4   3  -8   15.44    2.66
  -4   3   8   16.61    2.22
  -3  -3   7   16.27    1.85
   3  -3  -7   15.71    2.23
   3   3  -7   13.69    2.08
  -3   3   7   17.25    1.95
   2  -3  -6   34.19    2.18
  -2  -3   6   33.93    2.21
   2   3  -6   33.20    2.30
  -2   3   6   32.09    2.08
  -1  -3   5   54.63    2.71
   1  -3  -5   51.74    2.52
   1   3  -5   53.79    2.75
  -1   3   5   53.67    2.41
   0  -3  -4    2.05    0.87
   0  -3  -4    2.05    0.92
   0  -3   4   -0.27    1.00
   0   3  -4    0.25    1.06
   0   3   4    1.06    0.86
  -1  -3  -3   22.57    1.31
  -1  -3  -3   25.43    1.37
   1  -3   3   25.69    1.58
  -1   3  -3   24.64    1.64
  -2  -3  -2    1.07    0.50
   2  -3   2    0.79    0.54
  -2  -3  -2    0.25    0.55
  -2   3  -2    1.72    0.80
   2   3   2    0.70    0.53
   3  -3   1    7.35    0.58
  -3  -3  -1    6.56    0.60
  -3   3  -1    7.13    0.85
   4  -3   0   40.64    1.45
  -4   3   0   40.15    1.74
   4   3   0   42.97    1.45
   5  -3  -1   10.99    0.67
  -5  -3   1    9.95    0.69
   5   3  -1    9.89    0.66
   6  -3  -2   16.78    0.92
  -6  -3   2   18.20    1.28
   6   3  -2   17.29    0.84
   7  -3  -3   -0.23    0.50
  -7  -3   3   -1.51    1.12
   7   3  -3    0.60    0.44
  -8  -3   4   21.06    1.87
   8  -3  -4   23.26    1.39
   8   3  -4   25.34    1.22
  -9  -3   5   16.46    2.02
   9  -3  -5   16.64    1.35
  10  -3  -6   27.97    1.91
 -10  -3   6   29.17    2.68
 -11  -3   7    3.74    2.41
  11  -3  -7    1.47    1.59
 -12  -3   8   13.54    3.19
  12  -3  -8   13.03    2.44
  -6   4  10    4.95    4.26
  -5  -4   9    2.15    1.89
  -5   4   9    2.01    2.44
  -4  -4   8   19.39    2.13
  -4   4   8   25.82    2.47
   4   4  -8   20.38    2.87
  -3  -4   7    3.10    1.53
  -3   4   7    3.24    1.61
   3   4  -7    1.62    1.90
   2  -4  -6    4.51    1.48
  -2  -4   6    0.01    1.31
   2  -4  -6    3.73    1.37
  -2   4   6    2.72    1.29
   2   4  -6    2.72    1.59
  -1  -4   5    4.11    1.33
   1  -4  -5    4.07    1.13
   1  -4  -5    7.28    1.21
   1   4  -5    3.95    1.34
   0  -4  -4   97.41    3.30
   0  -4   4   97.23    3.68
   0  -4  -4   93.14    3.29
   0   4  -4  101.34    3.58
   1  -4   3   33.49    1.76
  -1  -4  -3   37.27    1.51
  -1  -4  -3   36.04    1.54
  -1   4  -3   31.01    1.80
   2  -4   2    0.39    0.52
  -2  -4  -2   -0.72    0.45
  -2  -4  -2    0.62    0.54
  -2   4  -2    0.37    0.73
   3  -4   1   10.72    0.71
  -3  -4  -1   11.76    0.73
  -3   4  -1    8.11    0.85
   4  -4   0   18.58    0.90
   4   4   0   18.47    0.90
  -4   4   0   19.08    1.20
   5  -4  -1   29.16    1.15
  -5  -4   1   28.53    1.03
   5   4  -1   27.43    1.13
   6  -4  -2    0.70    0.47
  -6  -4   2    0.26    0.79
   6   4  -2    0.07    0.41
  -7  -4   3   33.16    2.18
   7  -4  -3   30.60    1.41
   7   4  -3   34.30    1.33
   8  -4  -4  111.12    3.65
  -8  -4   4  107.78    4.32
   8   4  -4  108.84    3.48
   9  -4  -5    6.23    1.07
  -9  -4   5    7.50    1.99
 -10  -4   6    5.06    2.37
  10  -4  -6    4.95    1.27
  11  -4  -7    2.42    1.61
 -11  -4   7    2.41    2.63
  12  -4  -8    1.94    2.18
  -5  -5   9    6.21    1.96
   5   5  -9    5.38    3.23
  -5   5   9    3.64    2.70
  -4  -5   8   23.02    2.19
  -4   5   8   24.76    2.53
   4   5  -8   23.24    2.86
  -3  -5   7   35.51    2.40
   3  -5  -7   31.23    2.41
   3   5  -7   28.47    2.55
  -3   5   7   33.59    2.40
  -2  -5   6    6.72    1.54
   2  -5  -6    5.40    1.53
   2  -5  -6    4.57    1.37
   2   5  -6    6.11    1.70
  -1  -5   5   18.77    1.78
   1  -5  -5   14.95    1.39
   1  -5  -5   16.49    1.41
   1   5  -5   19.55    1.72
   0  -5   4   15.60    1.49
   0  -5  -4   19.41    1.21
   0  -5  -4   17.01    1.18
   0   5  -4   14.39    1.40
  -1  -5  -3   38.66    1.57
  -1  -5  -3   39.50    1.63
   1  -5   3   36.87    1.91
  -1   5  -3   38.09    1.93
  -2  -5  -2   26.82    1.12
  -2  -5  -2   26.02    1.26
   2  -5   2   27.54    1.37
  -2   5  -2   26.57    1.50
   3  -5   1    5.98    0.64
  -3  -5  -1    7.38    0.47
   3   5   1    7.54    0.62
  -3   5  -1    7.52    0.80
   4  -5   0    4.95    0.56
  -4   5   0    4.21    0.72
   4   5   0    5.12    0.56
   5  -5  -1    0.97    0.46
  -5  -5   1    1.09    0.35
   5   5  -1    2.21    0.50
   6  -5  -2   22.09    1.13
  -6  -5   2   22.61    1.20
   6   5  -2   23.36    1.09
  -7  -5   3   16.59    1.36
   7  -5  -3   14.88    1.04
   7   5  -3   16.15    0.94
   8  -5  -4   21.38    1.39
  -8  -5   4   21.26    1.96
   8   5  -4   22.92    1.32
   9  -5  -5    1.22    0.88
  -9  -5   5   -2.25    1.86
   9   5  -5    0.36    0.91
  10  -5  -6   13.06    1.47
 -10  -5   6   15.33    3.08
  11  -5  -7   10.30    1.70
  12  -5  -8    8.19    2.25
  -5  -6   9    5.31    2.09
   5   6  -9   -0.07    3.34
  -5   6   9    1.26    2.77
  -4  -6   8    2.25    1.74
  -4   6   8    2.59    2.14
   4   6  -8    0.35    2.61
  -3  -6   7    3.58    1.67
   3  -6  -7    3.66    1.75
   3   6  -7    3.43    2.03
  -2  -6   6   58.87    3.25
   2  -6  -6   66.16    2.97
   2  -6  -6   60.37    2.93
   2   6  -6   59.68    3.29
   1  -6  -5   12.09    1.30
   1  -6  -5   13.58    1.33
  -1  -6   5   13.04    1.73
   1   6  -5   13.96    1.64
   0  -6   4   -0.02    1.08
   0  -6  -4    1.39    0.86
   0  -6  -4    0.80    0.83
   0   6  -4    1.68    1.08
  -1  -6  -3   20.28    1.17
   1  -6   3   18.96    1.34
  -1  -6  -3   20.11    1.24
   1   6   3   14.47    1.02
  -1   6  -3   16.19    1.29
   2  -6   2   31.94    1.56
  -2  -6  -2   31.86    1.29
   2   6   2   31.65    1.39
  -2   6  -2   35.39    1.68
   3  -6   1   56.07    2.00
  -3  -6  -1   57.37    1.77
   3   6   1   52.38    1.93
  -3   6  -1   51.47    2.09
   4  -6   0   -0.48    0.47
  -4  -6   0    0.39    0.35
   4   6   0    0.51    0.48
  -4   6   0    1.36    0.65
   5  -6  -1   23.19    1.11
  -5  -6   1   18.68    0.87
   5   6  -1   19.66    1.07
  -5   6   1   17.98    1.26
   6  -6  -2   74.53    2.48
  -6  -6   2   74.22    2.39
   6   6  -2   67.13    2.42
   7  -6  -3   28.13    1.43
  -7  -6   3   28.63    1.79
   7   6  -3   29.56    1.37
   8  -6  -4    3.45    0.82
   8   6  -4    1.72    0.79
   9  -6  -5   13.69    1.26
   9   6  -5   13.23    1.20
  10  -6  -6   29.19    1.92
  11  -6  -7    2.75    1.62
  12  -6  -8    2.45    2.17
  -5  -7   9    6.48    2.29
  -5   7   9    9.71    3.16
   5   7  -9    5.65    3.61
  -4  -7   8    4.15    1.93
   4  -7  -8    5.45    2.37
   4   7  -8    7.86    2.65
  -4   7   8    8.98    2.41
  -3  -7   7    5.23    1.81
   3  -7  -7    5.20    1.91
   3   7  -7    6.55    2.19
   2  -7  -6   30.41    2.08
  -2  -7   6   29.88    2.45
   2   7  -6   29.01    2.37
   1  -7  -5   61.39    2.62
   1  -7  -5   57.85    2.58
  -1  -7   5   61.34    3.19
  -1   7   5   58.87    2.54
   1   7  -5   61.03    2.98
   0  -7  -4    4.87    0.96
   0  -7   4    6.09    1.31
   0   7  -4    3.59    1.17
   0   7   4    3.06    0.91
  -1  -7  -3    6.08    0.82
   1  -7   3    4.08    1.02
  -1   7  -3    6.05    1.09
   1   7   3    7.07    0.83
  -2  -7  -2    3.09    0.61
   2  -7   2    2.33    0.76
  -2   7  -2    1.66    0.86
   2   7   2    2.43    0.64
  -3  -7  -1    7.42    0.60
   3  -7   1    6.79    0.76
  -3   7  -1    5.66    0.87
   3   7   1    6.75    0.75
   4  -7   0   43.65    1.74
  -4   7   0   43.87    1.84
   4   7   0   44.48    1.72
   5  -7  -1    7.48    0.74
   5   7  -1    8.44    0.77
  -5   7   1    5.97    0.86
   6  -7  -2    8.26    0.79
   6   7  -2    8.74    0.83
   7  -7  -3    3.38    0.75
   7   7  -3    4.71    0.79
   8  -7  -4    7.48    0.98
   8   7  -4    7.61    0.98
   9  -7  -5   17.54    1.43
   9   7  -5   14.75    1.38
  10  -7  -6   18.34    1.69
  11  -7  -7    2.55    1.60
   5   8  -9   -3.14    3.65
  -5   8   9    5.41    3.49
   4  -8  -8    9.85    2.56
  -4  -8   8   11.68    2.42
   4   8  -8    9.24    2.97
  -3  -8   7    3.10    2.04
   3  -8  -7    3.87    1.98
   3   8  -7    3.57    2.02
  -2  -8   6   -0.96    1.77
   2  -8  -6    1.53    1.50
   2   8  -6    1.58    1.72
   1  -8  -5   14.53    1.46
  -1  -8   5   12.88    1.84
   1   8  -5   11.09    1.65
  -1   8   5   11.52    1.30
   0  -8   4   63.68    3.11
   0  -8  -4   70.98    2.63
   0   8   4   63.71    2.58
   0   8  -4   66.33    2.97
   1  -8   3   33.85    1.96
  -1  -8  -3   34.60    1.66
   1   8   3   30.44    1.65
  -1   8  -3   36.03    2.03
   2  -8   2    0.30    0.76
  -2  -8  -2    1.47    0.75
   2   8   2    0.89    0.72
  -2   8  -2    1.46    0.96
   3  -8   1   19.66    1.31
  -3   8  -1   22.68    1.49
   3   8   1   19.71    1.25
   4  -8   0    3.90    0.73
   4   8   0    5.48    0.78
  -4   8   0    4.54    0.86
   5  -8  -1   59.09    2.17
   5   8  -1   56.09    2.13
  -5   8   1   54.75    2.22
   6  -8  -2    1.22    0.65
   6   8  -2    0.78    0.70
   7  -8  -3   18.76    1.28
   7   8  -3   19.46    1.25
   8  -8  -4   47.88    2.17
   8   8  -4   43.92    2.11
   9  -8  -5   10.15    1.31
   9   8  -5   16.27    1.48
  10  -8  -6    3.79    1.37
  11  -8  -7    4.44    1.77
  -4  -9   8   16.99    2.96
   4  -9  -8   18.61    3.05
   4   9  -8   13.52    3.13
  -3  -9   7   21.78    2.66
   3  -9  -7   19.56    2.50
   3   9  -7   21.62    2.60
   2  -9  -6   -0.33    1.63
  -2  -9   6   -0.94    1.87
   2   9  -6    0.34    1.80
  -1  -9   5    3.56    1.73
   1  -9  -5    0.74    1.32
  -1   9   5    1.07    1.20
   1   9  -5    1.29    1.58
   0  -9  -4   14.34    1.38
   0  -9   4   17.57    1.79
   0   9  -4   11.92    1.58
   0   9   4   19.56    1.40
   1  -9   3   24.79    1.76
   1   9   3   24.43    1.49
  -1   9  -3   25.17    1.74
   2  -9   2   27.41    1.72
  -2   9  -2   31.45    1.94
   2   9   2   30.88    1.63
   3  -9   1    2.44    0.80
   3   9   1    1.88    0.77
  -3   9  -1    0.55    0.89
   4  -9   0    1.97    0.73
   4   9   0    2.49    0.80
  -4   9   0    1.88    0.88
   5  -9  -1    5.18    0.86
  -5   9   1    5.13    1.01
   5   9  -1    5.64    0.87
   6  -9  -2   19.95    1.39
   6   9  -2   21.36    1.45
   7  -9  -3   10.84    1.13
   7   9  -3   10.21    1.13
   8  -9  -4    8.85    1.21
   8   9  -4   11.13    1.22
   9  -9  -5    2.95    1.20
   9   9  -5    3.49    1.35
  10  -9  -6    5.92    1.49
  10   9  -6    3.73    1.92
  11  -9  -7    7.89    2.49
  -4 -10   8    3.34    5.47
   4  10  -8   -0.36    3.10
  -3 -10   7    4.28    2.51
   3  10  -7    3.30    2.36
  -2 -10   6   24.30    2.66
   2  10  -6   24.16    2.44
  -1 -10   5    4.68    1.85
   1  10  -5    4.89    1.69
  -1  10   5    5.02    1.50
   0 -10   4    2.72    1.50
   0  10  -4    3.30    1.47
   0  10   4    2.22    1.20
   1 -10   3   20.04    1.68
   1  10   3   20.56    1.48
  -1  10  -3   22.34    1.78
   2 -10   2   20.70    1.52
   2  10   2   20.17    1.43
  -2  10  -2   24.68    1.70
   3 -10   1   60.40    2.44
   3  10   1   55.99    2.36
  -3  10  -1   54.99    2.53
   4 -10   0    1.61    0.82
   4  10   0    1.01    0.82
  -4  10   0    0.84    0.98
   5 -10  -1   13.55    1.21
   5  10  -1   16.60    1.26
   6 -10  -2   27.62    1.74
   6  10  -2   27.80    1.72
   7 -10  -3   33.53    1.91
   7  10  -3   32.63    1.93
   8 -10  -4    1.97    1.15
   8  10  -4    2.78    1.19
   9 -10  -5    6.03    1.42
   9  10  -5    8.76    1.60
  10 -10  -6   11.54    1.81
  10  10  -6    9.79    2.05
  -3 -11   7   -1.48    2.68
   3  11  -7    1.62    2.76
  -2 -11   6   22.53    2.83
   2  11  -6   13.34    2.37
  -1 -11   5   23.27    2.54
   1  11  -5   23.21    2.29
   0 -11   4    6.91    1.75
   0  11  -4    6.30    1.65
   0  11   4    7.34    1.47
   1 -11   3    1.93    1.32
  -1  11  -3    0.28    1.45
   1  11   3    0.43    1.21
   2 -11   2    1.93    1.08
  -2  11  -2    2.04    1.29
   2  11   2    2.19    1.14
   3 -11   1   -0.52    0.96
  -3  11  -1    0.67    1.18
   3  11   1    0.95    1.03
   4 -11   0   33.62    1.93
   4  11   0   34.40    1.96
  -4  11   0   30.48    2.11
   5 -11  -1    3.89    0.97
   5  11  -1    3.49    1.02
   6 -11  -2    3.37    1.02
   6  11  -2    1.13    1.04
   7 -11  -3   10.41    1.31
   7  11  -3    9.95    1.34
   8 -11  -4    3.13    1.32
   8  11  -4    5.01    1.39
   9 -11  -5   10.43    1.67
   9  11  -5   11.27    1.80
  10  11  -6    5.58    2.27
  -2 -12   6   -0.30    2.71
   2  12  -6    1.60    2.43
  -1 -12   5    9.98    2.40
   1  12  -5   11.54    2.20
   0 -12   4   26.18    2.32
   0  12   4   24.22    2.02
   0  12  -4   21.83    2.23
   1 -12   3   26.75    2.11
  -1  12  -3   25.10    2.17
   1  12   3   27.44    1.96
   2 -12   2    0.01    1.24
   2  12   2    0.42    1.27
  -2  12  -2   -0.37    1.45
   3 -12   1   13.91    1.46
  -3  12  -1   14.47    1.70
   3  12   1   17.61    1.61
   4 -12   0    3.03    1.10
   4  12   0    3.08    1.18
  -4  12   0    2.23    1.35
   5 -12  -1   45.49    2.38
   5  12  -1   44.93    2.40
   6 -12  -2    0.86    1.14
   6  12  -2    1.49    1.14
   7 -12  -3    7.61    1.42
   7  12  -3    5.95    1.40
   8 -12  -4   18.60    1.86
   8  12  -4   16.68    1.86
   9 -12  -5   11.41    1.87
   9  12  -5   11.73    2.01
  -1 -13   5    0.56    2.52
   1  13  -5    0.61    2.21
   0 -13   4    7.56    2.18
   0  13  -4    6.25    2.09
   0  13   4    5.52    2.00
   1 -13   3    7.54    1.87
   1  13   3    8.84    1.78
  -1  13  -3    9.84    2.08
   2 -13   2   20.61    1.96
  -2  13  -2   20.94    2.17
   2  13   2   22.72    1.98
   3 -13   1   -1.02    1.28
  -3  13  -1   -0.56    1.61
   3  13   1    0.80    1.43
   4 -13   0   -0.28    1.21
   4  13   0    0.27    1.26
   5 -13  -1    7.70    1.46
   5  13  -1    7.33    1.43
   6 -13  -2   14.13    1.67
   6  13  -2   11.81    1.60
   7 -13  -3    5.15    1.59
   7  13  -3    3.44    1.56
   8 -13  -4    2.66    1.77
   8  13  -4    1.83    1.78
   0 -14   4   -0.88    2.37
   0  14  -4    1.13    2.31
   1 -14   3   15.06    2.32
  -1  14  -3   15.34    2.41
   1  14   3   12.57    2.16
   2 -14   2   11.89    2.00
   2  14   2   12.26    1.96
  -2  14  -2   10.94    2.20
   3 -14   1   35.03    2.37
   3  14   1   33.98    2.35
  -3  14  -1   33.82    2.60
   4 -14   0    0.56    1.48
   4  14   0    1.66    1.53
   5 -14  -1    7.69    1.66
   5  14  -1    7.71    1.64
   6 -14  -2    5.21    1.65
   6  14  -2    6.32    1.67
   7 -14  -3   19.76    2.14
   7  14  -3   21.28    2.20
   1 -15   3    1.37    2.56
   1  15   3    3.27    2.32
  -1  15  -3    3.25    2.49
   2 -15   2    1.35    2.13
   2  15   2    0.70    2.08
  -2  15  -2    1.83    2.40
   3 -15   1    1.45    1.87
   3  15   1    1.05    1.90
  -3  15  -1   -2.14    3.77
   4 -15   0   20.53    2.18
   4  15   0   13.55    2.07
   5 -15  -1   -0.44    1.79
   5  15  -1   -0.57    1.90
  -5   0  10   -0.82    2.46
  -4   0   9   -3.58    1.95
  -3   0   8    2.45    1.79
   3   0  -8    3.74    2.20
   2   0  -7    0.27    1.68
  -2   0   7   -0.48    1.52
  -1   0   6    0.53    1.32
   1   0  -6   -0.59    1.42
   0   0  -5  143.51    4.98
   0   0   5  144.31    4.91
   1   0   4    5.34    1.10
  -1   0  -4    5.23    1.20
  -2   0  -3    9.59    1.14
   2   0   3    6.59    0.93
  -3   0  -2    8.11    0.94
   3   0   2    8.48    0.68
   4   0   1  442.79   12.87
  -4   0  -1  446.27   13.03
  -5   0   0    3.31    0.51
   5   0   0    4.19    0.38
   6   0  -1    0.46    0.40
  -6   0   1    1.30    0.39
   7   0  -2    9.89    0.72
   8   0  -3    4.33    0.77
   9   0  -4    3.29    1.00
  10   0  -5    0.92    1.35
 -11   0   6   38.51    2.50
  11   0  -6   39.25    2.73
 -12   0   7   21.62    2.50
 -13   0   8    3.36    2.95
  -5  -1  10   11.37    2.69
  -5   1  10   10.55    2.79
  -4  -1   9    2.71    2.10
  -4   1   9    5.30    2.29
   3  -1  -8   27.60    2.63
  -3  -1   8   20.16    2.18
   3   1  -8   17.42    2.46
  -3   1   8   19.32    2.27
   2  -1  -7   33.89    2.44
  -2  -1   7   30.22    2.23
  -2   1   7   37.54    2.44
   2   1  -7   31.87    2.41
   1  -1  -6   15.77    1.81
  -1  -1   6   15.05    1.67
  -1   1   6   20.04    1.80
   1   1  -6   14.40    1.73
   0  -1  -5   67.99    3.00
   0  -1   5   65.61    2.92
   0   1  -5   67.00    3.00
   0   1   5   63.68    2.84
   1  -1   4   14.11    1.34
  -1  -1  -4   15.74    1.45
   1   1   4   12.95    1.27
  -1   1  -4   11.09    1.36
   2  -1   3   56.59    2.30
  -2  -1  -3   61.01    2.41
   2   1   3   60.40    2.35
  -2   1  -3   56.78    2.47
  -3  -1  -2   17.82    1.25
   3  -1   2   20.25    1.05
   3   1   2   19.09    1.06
  -3   1  -2   22.12    1.49
  -4  -1  -1   37.67    1.50
   4  -1   1   37.88    1.32
   4   1   1   39.18    1.24
  -4   1  -1   39.05    1.67
   5  -1   0    3.84    0.42
  -5  -1   0    3.26    0.48
  -5   1   0    4.70    0.60
   5   1   0    4.26    0.34
   6  -1  -1   26.13    1.08
  -6  -1   1   28.42    1.06
  -6   1   1   27.86    1.05
   6   1  -1   26.87    1.06
   7  -1  -2    6.09    0.61
   7   1  -2    6.27    0.49
   7   1  -2    5.73    0.69
   8  -1  -3   17.91    1.21
   8   1  -3   20.72    1.43
   9  -1  -4    1.33    0.86
   9   1  -4    1.35    1.16
 -10  -1   5    6.97    1.51
  10  -1  -5    3.50    1.20
  10   1  -5    4.29    1.65
  11  -1  -6    4.75    1.71
 -11  -1   6    3.11    1.83
  12  -1  -7    4.21    2.13
 -12  -1   7    2.19    2.35
 -12   1   7    3.60    1.99
 -13  -1   8    2.85    3.05
 -13   1   8    5.12    2.71
  -5  -2  10   -0.64    2.36
  -5   2  10   -0.32    2.90
  -4  -2   9    8.68    2.15
  -4   2   9    8.18    2.43
  -3  -2   8    1.20    1.70
  -3   2   8    3.90    1.95
   3   2  -8    2.13    2.22
   2  -2  -7   15.85    2.22
  -2  -2   7   17.31    1.87
   2   2  -7   13.82    2.06
  -2   2   7   15.60    1.98
   1  -2  -6    8.08    1.74
  -1  -2   6   10.12    1.53
   1   2  -6   10.17    1.74
  -1   2   6   12.83    1.64
   0  -2   5    2.23    1.23
   0  -2  -5    2.87    1.34
   0   2   5    1.66    1.19
   0   2  -5    1.98    1.34
  -1  -2  -4    4.42    1.16
   1  -2   4    3.97    1.09
   1   2   4    5.52    1.10
  -1   2  -4    4.69    1.24
  -2  -2  -3  290.76    8.78
   2  -2   3  295.69    8.80
   2   2   3  285.16    8.74
  -2   2  -3  295.12    8.95
   3  -2   2    1.10    0.53
  -3  -2  -2    1.29    0.61
  -3   2  -2    0.32    0.89
   3   2   2    1.29    0.64
  -4  -2  -1    4.54    0.57
   4  -2   1    4.71    0.50
  -4   2  -1    6.33    0.88
   5  -2   0    6.70    0.52
  -5  -2   0    6.64    0.56
  -5   2   0    5.00    0.73
   6  -2  -1  134.05    3.98
   6   2  -1  133.27    3.94
   6   2  -1  125.22    4.00
   7  -2  -2    1.29    0.50
   7   2  -2    1.64    0.83
   7   2  -2    2.13    0.44
  -8  -2   3    0.37    1.03
   8  -2  -3    0.58    0.60
   8   2  -3    1.11    1.07
   8   2  -3   -0.38    0.47
  -9  -2   4   35.01    2.09
   9  -2  -4   28.85    1.69
  10  -2  -5   21.93    1.62
 -10  -2   5   24.80    2.14
  11  -2  -6    6.76    1.61
 -11  -2   6    8.01    2.24
 -12  -2   7   -1.09    2.57
  12  -2  -7    1.97    1.97
  13  -2  -8   15.39    2.97
 -13   2   8   21.42    2.92
  -5  -3  10   26.95    4.59
  -5   3  10   19.98    3.43
  -4  -3   9    5.55    1.93
   4   3  -9   11.73    2.97
  -4   3   9    9.12    2.67
  -3  -3   8   14.45    1.95
   3   3  -8   15.66    2.52
  -3   3   8   21.79    2.47
   2  -3  -7   23.46    2.34
  -2  -3   7   15.85    1.79
   2   3  -7   16.48    2.21
  -2   3   7   19.18    2.07
   1  -3  -6   14.08    1.84
  -1  -3   6   11.93    1.60
   1   3  -6    4.48    1.71
  -1   3   6    8.17    1.58
   0  -3   5   64.09    2.90
   0  -3  -5   59.40    2.79
   0   3  -5   60.85    3.02
   0   3   5   60.90    2.77
   1  -3   4   17.73    1.52
  -1  -3  -4   15.29    1.33
  -1   3  -4   18.90    1.63
   1   3   4   20.86    1.41
   2  -3   3   54.43    2.25
  -2  -3  -3   55.48    2.15
  -2   3  -3   59.93    2.53
   2   3   3   51.92    2.17
   3  -3   2    2.20    0.58
  -3  -3  -2    3.33    0.66
  -3   3  -2    4.41    1.02
   3   3   2    3.53    0.74
   4  -3   1   19.43    0.97
  -4  -3  -1   22.23    1.04
  -4   3  -1   18.34    1.33
  -5  -3   0   11.21    0.71
   5  -3   0   12.58    0.78
   5   3   0   12.63    0.78
  -5   3   0   13.07    1.04
   6  -3  -1   18.91    0.95
   6   3  -1   19.69    0.91
   7  -3  -2    5.35    0.61
  -7  -3   2    5.68    1.12
   7   3  -2    3.30    0.51
   8  -3  -3   18.84    1.20
  -8  -3   3   14.68    1.69
   8   3  -3   23.47    1.05
  -9  -3   4    6.73    1.78
   9  -3  -4    7.12    0.96
 -10  -3   5    2.21    1.98
  10  -3  -5    1.54    1.02
 -11  -3   6    2.85    2.38
  11  -3  -6    2.16    1.37
  12  -3  -7    3.91    1.91
  13  -3  -8    6.36    2.60
  -5   4  10    4.54    3.68
  -4  -4   9    3.04    1.88
  -4   4   9    1.26    2.52
   4   4  -9    0.26    3.00
  -3  -4   8    8.05    1.75
  -3   4   8    9.54    2.30
   3   4  -8    7.54    2.52
   2  -4  -7   -0.22    1.96
  -2  -4   7    2.85    1.54
   2   4  -7    1.24    1.98
  -2   4   7    3.13    1.79
  -1  -4   6    1.40    1.35
   1  -4  -6    1.33    1.53
  -1   4   6    0.91    1.47
   1   4  -6    1.26    1.71
   0  -4   5   77.35    3.35
   0  -4  -5   75.35    3.08
   0   4  -5   75.49    3.44
   0   4   5   74.88    3.06
  -1  -4  -4    4.82    1.00
   1  -4   4    5.00    1.16
   1   4   4    8.32    1.07
  -1   4  -4    7.39    1.33
  -2  -4  -3    7.50    0.88
   2  -4   3    6.74    0.96
  -2   4  -3    5.75    1.15
   2   4   3    4.81    0.84
   3  -4   2   19.80    1.16
  -3  -4  -2   19.67    1.12
  -3   4  -2   16.18    1.34
   3   4   2   15.84    1.13
   4  -4   1  248.46    7.39
  -4  -4  -1  244.85    7.39
  -4   4  -1  251.53    7.62
   5  -4   0    5.08    0.59
  -5   4   0    5.23    0.99
   5   4   0    6.25    0.58
   6  -4  -1    1.11    0.47
   6   4  -1   -0.19    0.43
  -7  -4   2   11.86    1.06
   7  -4  -2   12.36    0.86
   7   4  -2   12.92    0.78
   8  -4  -3    5.30    0.76
  -8  -4   3    9.62    1.53
   8   4  -3    5.90    0.66
   9  -4  -4    3.28    0.84
  -9  -4   4    1.77    2.10
   9   4  -4    1.95    0.77
  10  -4  -5    0.63    0.98
  11  -4  -6   30.18    2.05
  12  -4  -7   21.40    2.20
  13  -4  -8    2.08    2.46
  -4  -5   9    3.71    1.96
   4   5  -9    0.40    3.13
  -4   5   9    0.95    2.66
  -3  -5   8   19.47    2.07
   3   5  -8   14.70    2.77
  -3   5   8   19.59    2.57
   2  -5  -7   28.92    2.64
  -2  -5   7   32.85    2.31
  -2   5   7   36.46    2.51
   2   5  -7   27.92    2.68
   1  -5  -6   13.44    1.82
  -1  -5   6   18.88    1.87
  -1   5   6   19.82    1.83
   1   5  -6   22.03    2.20
   0  -5   5   35.64    2.44
   0  -5  -5   38.08    2.28
   0  -5  -5   33.38    2.14
   0   5   5   36.94    2.17
   0   5  -5   38.69    2.60
  -1  -5  -4    1.93    0.91
   1  -5   4    0.39    1.14
  -1  -5  -4    1.94    1.06
  -1   5  -4    4.11    1.22
  -2  -5  -3   42.91    1.85
  -2  -5  -3   45.07    1.89
   2  -5   3   42.66    2.01
  -2   5  -3   46.06    2.24
  -3  -5  -2   19.16    1.18
   3  -5   2   20.24    1.23
  -3  -5  -2   18.83    1.12
  -3   5  -2   22.15    1.42
   4  -5   1   25.59    1.24
  -4   5  -1   22.96    1.61
   4   5   1   26.63    1.21
   5  -5   0    0.19    0.49
   5   5   0    1.70    0.51
  -5   5   0    2.33    0.93
   6  -5  -1   23.33    1.12
   6   5  -1   22.08    1.10
   7  -5  -2   12.32    0.89
   7   5  -2   12.19    0.82
   8  -5  -3    4.94    0.77
   8   5  -3    6.17    0.74
   9  -5  -4    8.38    1.02
   9   5  -4    7.47    0.93
  10  -5  -5    6.57    1.16
  11  -5  -6    7.51    1.43
  12  -5  -7    3.15    1.75
  13  -5  -8    2.03    2.56
  -4  -6   9    3.90    2.04
   4   6  -9    2.02    3.37
  -4   6   9    5.18    2.94
  -3  -6   8    3.33    1.74
  -3   6   8    2.01    2.38
   3   6  -8    0.66    2.53
  -2  -6   7    8.00    1.78
  -2   6   7    9.18    1.98
   2   6  -7    4.15    2.15
  -1  -6   6   17.65    1.97
   1  -6  -6   14.45    1.79
   1  -6  -6   17.61    1.90
   1   6  -6   12.78    2.04
   0  -6   5    3.31    1.48
   0  -6  -5    3.97    1.19
   0  -6  -5    2.27    1.34
   0   6  -5    2.03    1.52
  -1  -6  -4   11.96    1.22
   1  -6   4   10.63    1.40
  -1  -6  -4   12.57    1.16
  -1   6  -4   10.27    1.48
   2  -6   3  166.34    5.43
  -2  -6  -3  172.55    5.18
  -2  -6  -3  165.38    5.25
  -2   6  -3  167.50    5.52
   3  -6   2    2.93    0.78
  -3   6  -2    2.78    0.99
   3   6   2    4.64    0.70
   4  -6   1    2.18    0.62
   4   6   1    1.85    0.59
  -4   6  -1    1.82    0.89
   5  -6   0   25.70    1.24
  -5   6   0   23.69    1.60
   5   6   0   23.97    1.22
   6  -6  -1   83.20    2.83
   6   6  -1   85.61    2.80
   7  -6  -2    3.01    0.70
   7   6  -2    2.97    0.66
   8  -6  -3    0.76    0.68
   8   6  -3    0.21    0.66
   9  -6  -4   18.95    1.35
   9   6  -4   22.67    1.31
  10  -6  -5   19.35    1.53
  11  -6  -6    5.26    1.42
  12  -6  -7   -0.54    1.68
  -4  -7   9    8.79    2.36
  -4   7   9   11.82    3.40
   4   7  -9    9.29    3.69
  -3  -7   8   11.47    2.17
   3   7  -8    9.20    2.90
  -3   7   8   11.55    2.70
  -2  -7   7    7.57    1.89
   2  -7  -7    7.58    2.20
   2   7  -7    6.04    2.28
  -2   7   7    7.84    2.16
   1  -7  -6    1.96    1.70
   1  -7  -6    1.14    1.54
  -1  -7   6   -1.90    1.65
   1   7  -6    0.09    1.69
   0  -7  -5   42.80    2.39
   0  -7   5   38.87    2.73
   0  -7  -5   35.85    2.20
   0   7  -5   30.83    2.32
   1  -7   4   15.75    1.63
  -1  -7  -4   19.53    1.39
  -1  -7  -4   19.98    1.40
   1   7   4   19.65    1.40
  -1   7  -4   19.45    1.73
   2  -7   3   30.86    1.86
  -2   7  -3   28.43    1.83
   2   7   3   29.40    1.59
   3  -7   2   12.45    1.07
  -3   7  -2   11.56    1.28
   3   7   2   11.71    0.97
   4  -7   1   10.93    0.91
   4   7   1    9.23    0.84
  -4   7  -1    8.96    1.13
   5  -7   0   16.22    1.15
  -5   7   0   19.86    1.35
   5   7   0   16.97    1.15
   6  -7  -1    6.60    0.78
   6   7  -1    7.17    0.79
  -6   7   1    6.94    1.14
   7  -7  -2    7.27    0.88
   7   7  -2    6.07    0.78
   8  -7  -3   22.16    1.48
   8   7  -3   24.54    1.44
   9  -7  -4   12.42    1.23
   9   7  -4   11.37    1.17
  10  -7  -5    0.82    1.10
  10   7  -5    0.85    1.18
  11  -7  -6    5.77    1.51
  12  -7  -7    2.34    1.81
  -4   8   9    2.88    3.64
   4   8  -9    2.02    4.37
  -3  -8   8    8.44    2.40
   3  -8  -8   10.84    3.05
  -3   8   8   19.48    3.11
   3   8  -8   11.29    3.04
  -2  -8   7    0.33    1.95
   2  -8  -7    2.31    2.33
   2   8  -7   -0.36    2.22
   1  -8  -6    3.15    2.23
  -1  -8   6    1.94    1.85
  -1   8   6    3.90    1.61
   1   8  -6    0.76    1.80
   0  -8   5   27.03    2.27
   0   8   5   32.14    2.15
   0   8  -5   30.04    2.30
   1  -8   4   11.94    1.59
  -1   8  -4   14.71    1.71
   1   8   4   12.06    1.25
   2  -8   3    1.78    1.03
  -2   8  -3    2.18    1.24
   2   8   3    1.80    0.87
   3  -8   2   34.15    1.77
  -3   8  -2   30.95    2.02
   3   8   2   30.58    1.64
   4  -8   1  120.81    4.06
  -4   8  -1  128.30    4.23
   4   8   1  123.11    4.02
   5  -8   0    5.79    0.82
  -5   8   0    7.01    1.12
   5   8   0    7.54    0.86
   6  -8  -1    1.18    0.69
   6   8  -1    0.51    0.69
   7  -8  -2   20.61    1.42
   7   8  -2   21.35    1.41
   8  -8  -3    9.98    1.10
   8   8  -3   13.22    1.11
   9  -8  -4    3.17    1.07
   9   8  -4    3.53    1.11
  10  -8  -5    0.35    1.12
  10   8  -5    0.24    1.28
  11  -8  -6    9.70    1.63
  12  -8  -7   15.58    2.49
  -3  -9   8    7.27    2.61
   3   9  -8    3.61    3.04
  -2  -9   7   17.79    2.64
   2   9  -7   23.15    2.89
  -1  -9   6    7.89    2.14
   1   9  -6    6.83    2.05
   0  -9   5   11.88    1.97
   0   9  -5   10.70    1.86
   0   9   5   12.20    1.59
   1  -9   4    6.29    1.57
  -1   9  -4    6.38    1.66
   1   9   4    6.64    1.26
   2  -9   3   13.69    1.46
   2   9   3   16.23    1.34
  -2   9  -3   12.66    1.57
   3  -9   2   14.00    1.25
  -3   9  -2   14.96    1.46
   3   9   2   12.90    1.17
   4  -9   1    8.48    1.03
  -4   9  -1   12.36    1.31
   4   9   1    8.58    1.01
   5  -9   0    4.66    0.89
   5   9   0    6.56    0.94
  -5   9   0    6.38    1.19
   6  -9  -1   17.16    1.23
   6   9  -1   18.64    1.23
   7  -9  -2   14.40    1.24
   7   9  -2   17.44    1.27
   8  -9  -3    1.98    0.98
   8   9  -3    0.58    0.92
   9  -9  -4   13.51    1.41
   9   9  -4   13.09    1.42
  10  -9  -5    8.48    1.45
  10   9  -5    8.23    1.57
  11  -9  -6   12.50    1.84
  -2 -10   7    3.79    2.56
   2  10  -7    2.53    2.56
  -1 -10   6   14.16    2.59
   1  10  -6   19.27    2.39
   0 -10   5    3.96    2.02
   0  10  -5    3.84    1.86
   0  10   5    3.02    1.59
   1 -10   4   13.04    1.85
   1  10   4   14.82    1.57
  -1  10  -4   11.92    1.88
   2 -10   3   51.40    2.69
   2  10   3   52.18    2.52
  -2  10  -3   55.59    2.94
   3 -10   2    5.32    1.12
   3  10   2    5.09    1.11
  -3  10  -2    2.82    1.35
   4 -10   1    0.15    0.89
   4  10   1    0.22    0.89
  -4  10  -1    3.58    1.30
   5 -10   0   28.99    1.76
  -5  10   0   27.70    1.83
   5  10   0   28.05    1.71
   6 -10  -1   35.51    1.88
   6  10  -1   31.15    1.86
   7 -10  -2    5.51    1.04
   7  10  -2    6.33    1.11
   8 -10  -3    2.32    1.07
   8  10  -3    1.36    1.07
   9 -10  -4   10.20    1.46
   9  10  -4   11.42    1.47
  10 -10  -5   14.72    1.70
  10  10  -5   16.23    1.85
  11 -10  -6    2.09    1.87
  -2 -11   7    1.67    2.89
   2  11  -7   -2.76    2.69
  -1 -11   6   -1.79    2.54
   1  11  -6   -0.64    2.19
   0 -11   5   13.67    2.39
   0  11  -5   12.83    2.20
   0  11   5   12.88    1.93
   1 -11   4    8.99    1.87
   1  11   4    5.90    1.52
  -1  11  -4    3.48    1.81
   2 -11   3    7.77    1.56
  -2  11  -3    9.57    1.76
   2  11   3    9.32    1.51
   3 -11   2    7.46    1.35
   3  11   2   13.71    1.48
  -3  11  -2   11.42    1.68
   4 -11   1    4.34    1.17
   4  11   1    2.55    1.13
  -4  11  -1    4.13    1.43
   5 -11   0    8.31    1.19
  -5  11   0    8.21    1.75
   5  11   0   10.04    1.23
   6 -11  -1    0.67    1.02
   6  11  -1    0.96    1.04
   7 -11  -2   11.60    1.35
   7  11  -2   10.28    1.31
   8 -11  -3   15.75    1.57
   8  11  -3   18.84    1.64
   9 -11  -4   12.02    1.65
   9  11  -4   12.81    1.68
  10 -11  -5    1.62    1.57
  10  11  -5   -0.49    1.80
  -1 -12   6    2.91    2.92
   1  12  -6    2.13    2.55
   0 -12   5    3.55    2.38
   0  12  -5    4.02    2.21
   1 -12   4    6.28    2.07
   1  12   4   10.74    1.94
  -1  12  -4   12.68    2.15
   2 -12   3    0.39    1.54
   2  12   3   -0.75    1.48
  -2  12  -3    0.22    1.80
   3 -12   2   21.55    1.86
  -3  12  -2   19.37    2.07
   3  12   2   24.08    1.82
   4 -12   1   29.24    1.97
   4  12   1   29.82    1.92
  -4  12  -1   29.92    2.25
   5 -12   0    5.62    1.27
   5  12   0    7.09    1.37
   6 -12  -1    1.81    1.19
   6  12  -1   -0.04    1.12
   7 -12  -2   15.51    1.63
   7  12  -2   18.79    1.66
   8 -12  -3   10.64    1.56
   8  12  -3    7.18    1.58
   9 -12  -4    4.04    1.62
   9  12  -4    3.11    1.69
  10  12  -5    2.71    2.04
   0 -13   5    2.33    2.64
   0  13  -5    4.73    2.67
   1 -13   4    5.35    2.20
  -1  13  -4   10.97    2.55
   1  13   4   12.19    2.16
   2 -13   3    3.17    1.87
   2  13   3    2.61    1.75
  -2  13  -3    2.61    2.12
   3 -13   2    3.46    1.65
  -3  13  -2    4.04    1.98
   3  13   2    3.46    1.67
   4 -13   1    3.11    1.43
  -4  13  -1    2.13    1.91
   4  13   1    2.23    1.47
   5 -13   0    5.87    1.44
   5  13   0    5.74    1.50
   6 -13  -1   11.18    1.63
   6  13  -1   10.12    1.55
   7 -13  -2    6.60    1.61
   7  13  -2    7.95    1.63
   8 -13  -3   -0.70    1.52
   8  13  -3   -2.17    1.65
   1 -14   4    5.60    2.62
  -1  14  -4    6.56    2.74
   1  14   4    5.72    2.49
   2 -14   3    9.93    2.31
  -2  14  -3    7.67    2.50
   2  14   3    9.29    2.21
   3 -14   2    4.61    1.90
   3  14   2    5.10    1.96
  -3  14  -2    3.54    2.35
   4 -14   1    0.77    1.68
   4  14   1    0.51    1.68
   5 -14   0   20.34    2.01
   5  14   0   16.24    1.96
   6 -14  -1    7.64    1.75
   6  14  -1   11.10    1.80
   7 -14  -2    3.19    1.81
   7  14  -2    3.64    1.81
   2  15   3    1.04    2.50
  -2  15  -3    3.18    3.31
   3 -15   2    9.09    2.99
  -3  15  -2   11.36    2.90
   3  15   2    9.21    2.32
   4 -15   1    2.18    2.08
   4  15   1    6.77    2.08
   5 -15   0    2.08    2.18
  -4   0  10   -1.59    2.61
  -3   0   9    0.00    2.12
  -2   0   8    2.24    1.82
   2   0  -8    2.24    2.14
   1   0  -7    1.76    1.72
  -1   0   7    2.17    1.59
   0   0  -6    1.54    1.47
   0   0   6   -1.08    1.35
  -1   0  -5   16.95    1.70
   1   0   5   16.71    1.60
   2   0   4    6.24    1.13
  -2   0  -4    5.22    1.20
   3   0   3    1.94    0.81
  -3   0  -3    3.74    1.05
  -4   0  -2  233.58    7.04
   4   0   2  224.62    6.78
  -5   0  -1    2.20    0.69
   5   0   1    2.00    0.40
  -6   0   0   13.07    0.79
   6   0   0   11.72    0.70
   7   0  -1   15.48    0.90
  -7   0   1   14.73    0.87
   8   0  -2  324.46    9.59
   9   0  -3    2.03    0.83
  10   0  -4    2.42    1.11
  11   0  -5    0.25    1.48
 -12   0   6    9.70    2.08
  12   0  -6    5.62    2.11
 -13   0   7    6.49    2.69
  -4  -1  10    4.12    2.60
  -4   1  10    2.37    2.87
  -3  -1   9   20.37    2.38
   3   1  -9   16.19    2.86
  -3   1   9   16.98    2.63
  -2  -1   8    1.59    1.76
   2  -1  -8    3.55    2.24
  -2   1   8   -1.13    1.90
   2   1  -8    0.59    2.02
  -1  -1   7   29.89    2.18
   1  -1  -7   22.58    2.27
   1   1  -7   21.99    2.22
  -1   1   7   28.42    2.27
   0  -1  -6    0.58    1.54
   0  -1   6    2.98    1.38
   0   1  -6    1.26    1.53
   0   1   6    0.96    1.37
   1  -1   5   27.47    1.83
  -1  -1  -5   22.62    1.88
   1   1   5   25.79    1.79
  -1   1  -5   26.76    1.96
  -2  -1  -4   28.13    1.85
   2  -1   4   28.12    1.89
  -2   1  -4   35.77    2.15
   2   1   4   31.22    1.97
  -3  -1  -3    7.32    1.12
   3  -1   3    6.79    0.91
  -3   1  -3    4.58    1.12
   3   1   3    4.47    0.91
  -4  -1  -2   63.13    2.26
   4  -1   2   60.06    2.01
   4   1   2   54.12    1.94
  -4   1  -2   55.87    2.39
  -5  -1  -1    1.06    0.60
   5  -1   1    0.46    0.43
  -5   1  -1    1.48    0.74
   5   1   1    2.09    0.35
   6  -1   0   87.32    2.78
  -6  -1   0   89.60    2.86
   6   1   0   89.83    2.71
  -6   1   0   91.83    2.91
   7  -1  -1    7.29    0.63
  -7  -1   1    6.46    0.58
   7   1  -1    5.82    0.58
  -7   1   1    6.64    0.60
   8  -1  -2  120.78    3.67
   8   1  -2  110.97    3.69
   8   1  -2  115.71    3.52
   9  -1  -3    2.47    0.78
   9   1  -3    2.29    0.97
  10  -1  -4   71.19    2.80
  10   1  -4   70.00    3.17
  11  -1  -5    8.47    1.47
 -11  -1   5   11.52    1.84
  11   1  -5    8.04    1.89
 -12  -1   6   35.55    2.82
  12  -1  -6   36.98    2.65
  13  -1  -7    4.59    2.46
 -13   1   7    7.69    2.50
 -14   1   8    5.40    3.38
  -4  -2  10    1.31    2.37
  -4   2  10    0.02    2.84
  -3  -2   9    1.57    1.91
  -3   2   9    2.16    2.48
   3   2  -9    0.90    2.70
  -2  -2   8    6.33    1.76
   2  -2  -8    5.14    2.32
   2   2  -8    5.13    2.17
  -2   2   8    4.65    2.07
  -1  -2   7    5.51    1.60
   1  -2  -7    8.00    2.06
   1   2  -7    7.71    1.91
  -1   2   7    2.74    1.70
   0  -2   6   -0.19    1.26
   0  -2  -6   -1.92    1.54
   0   2  -6   -0.78    1.53
   0   2   6    0.66    1.38
   1  -2   5    1.94    1.17
  -1  -2  -5    0.07    1.35
  -1   2  -5   -0.34    1.34
   1   2   5    0.81    1.23
  -2  -2  -4   23.87    1.69
   2  -2   4   26.99    1.89
   2   2   4   25.96    1.61
  -2   2  -4   25.29    1.78
  -3  -2  -3   16.34    1.24
   3  -2   3   16.30    1.19
   3   2   3   15.73    1.19
  -3   2  -3   17.40    1.47
   4  -2   2   16.06    0.95
  -4  -2  -2   16.70    1.13
  -4   2  -2   17.38    1.37
   4   2   2   15.44    0.93
  -5  -2  -1   12.75    0.86
   5  -2   1   12.30    0.75
  -5   2  -1   11.61    1.11
  -6  -2   0  373.65   10.97
   6  -2   0  375.74   10.94
  -6   2   0  373.08   11.04
   7  -2  -1    4.00    0.57
   7   2  -1    4.19    0.51
   7   2  -1    3.50    0.67
   8  -2  -2    0.22    0.58
   8   2  -2    0.66    0.91
   8   2  -2    0.33    0.48
   9  -2  -3    6.38    0.86
  -9  -2   3    8.48    1.38
   9   2  -3    6.07    0.66
   9   2  -3    5.71    1.34
 -10  -2   4   99.75    4.03
  10  -2  -4   95.90    3.50
  11  -2  -5    0.56    1.21
  12  -2  -6    4.60    1.70
  13  -2  -7    2.60    2.27
  14  -2  -8    4.23    3.18
 -14   2   8    4.28    3.28
  -4   3  10   -1.21    3.04
  -3  -3   9   11.52    2.10
   3   3  -9    9.87    2.91
  -3   3   9   13.83    2.66
  -2  -3   8    8.26    1.77
   2  -3  -8   10.91    2.64
  -2   3   8    4.25    2.20
   2   3  -8    7.63    2.30
   1  -3  -7   36.83    2.83
  -1  -3   7   44.55    2.76
   1   3  -7   35.76    2.75
  -1   3   7   44.88    2.75
   0  -3   6   13.61    1.65
   0  -3  -6   15.08    1.91
   0   3  -6   13.16    1.94
   0   3   6   16.78    1.80
  -1  -3  -5   12.95    1.62
   1  -3   5   15.63    1.62
   1   3   5   18.29    1.63
  -1   3  -5   14.29    1.76
   2  -3   4    6.40    1.22
  -2  -3  -4    8.62    1.27
  -2   3  -4    4.58    1.37
   2   3   4    5.29    1.14
  -3  -3  -3    8.49    1.01
   3  -3   3    9.45    1.01
  -3   3  -3    6.48    1.26
   3   3   3    6.64    1.02
  -4  -3  -2   75.23    2.58
   4  -3   2   72.82    2.51
  -4   3  -2   70.31    2.93
  -5  -3  -1    7.70    0.73
   5  -3   1    7.44    0.67
  -5   3  -1    5.82    1.07
   6  -3   0   83.20    2.61
  -6  -3   0   82.69    2.62
  -6   3   0   73.17    2.84
   7  -3  -1    0.84    0.51
   7   3  -1    1.16    0.49
   8  -3  -2   63.85    2.31
   8   3  -2   67.02    2.20
   9  -3  -3   13.33    1.05
   9   3  -3   11.91    0.86
  10  -3  -4   70.43    2.78
  11  -3  -5    5.03    1.29
  12  -3  -6   24.70    2.08
  13  -3  -7    6.21    2.21
  14  -3  -8    8.17    3.08
  -4   4  10    5.61    3.47
  -3  -4   9    2.82    1.85
  -3   4   9    0.29    2.56
   3   4  -9    0.62    2.87
  -2  -4   8    4.21    1.72
   2   4  -8    4.34    2.38
  -2   4   8    3.28    2.29
  -1  -4   7    0.81    1.51
   1  -4  -7    4.11    2.10
   1   4  -7    3.85    2.05
  -1   4   7    3.18    1.91
   0  -4  -6    0.11    1.58
   0  -4   6    2.24    1.46
   0   4  -6    2.24    1.83
   0   4   6    2.28    1.62
  -1  -4  -5   20.19    1.70
   1  -4   5   19.47    1.77
  -1   4  -5   17.82    1.95
   1   4   5   20.01    1.69
  -2  -4  -4    3.94    1.10
   2  -4   4    5.19    1.23
   2   4   4    6.36    1.24
  -2   4  -4    4.85    1.39
   3  -4   3    4.09    0.92
  -3  -4  -3    7.21    0.98
   3   4   3    3.89    1.01
  -3   4  -3    3.97    1.29
   4  -4   2  129.37    4.12
  -4  -4  -2  127.55    4.12
  -4   4  -2  131.67    4.50
  -5  -4  -1   14.92    1.04
   5  -4   1   14.73    0.92
  -5   4  -1   14.51    1.45
   6  -4   0   10.15    0.77
  -6   4   0    9.62    1.15
   6   4   0   10.30    0.77
   7  -4  -1   14.06    1.00
   7   4  -1   15.61    0.97
   8  -4  -2  227.04    6.92
   8   4  -2  230.33    6.84
   9  -4  -3    3.98    0.83
   9   4  -3    4.98    0.71
  11  -4  -5    0.53    1.16
  12  -4  -6    7.14    1.66
  13  -4  -7    4.41    2.03
  -3  -5   9   21.37    2.38
  -3   5   9   21.86    3.24
   3   5  -9   18.42    3.43
  -2  -5   8    2.04    1.69
   2   5  -8    3.01    2.54
  -2   5   8    3.73    2.45
   1  -5  -7   15.12    2.39
  -1  -5   7   12.58    1.88
   1   5  -7   12.43    2.38
  -1   5   7   14.98    2.25
   0  -5  -6    7.29    1.70
   0  -5   6    4.85    1.55
   0   5  -6    6.85    1.92
   0   5   6    6.14    1.71
   1  -5   5   25.52    2.02
  -1  -5  -5   24.81    1.82
  -1   5  -5   28.44    2.21
   1   5   5   24.61    1.93
  -2  -5  -4   56.25    2.44
   2  -5   4   57.41    2.63
   2   5   4   54.92    2.54
  -2   5  -4   54.77    2.91
  -3  -5  -3    9.64    1.03
   3  -5   3   11.33    1.15
  -3   5  -3   10.32    1.46
   3   5   3   10.66    1.71
  -4  -5  -2   24.59    1.38
   4  -5   2   27.97    1.46
  -4   5  -2   23.07    1.72
   5  -5   1    2.86    0.65
   5   5   1    3.34    0.66
  -5   5  -1    2.69    1.15
   6  -5   0   60.82    2.20
   6   5   0   63.40    2.18
  -6   5   0   59.74    2.69
   7  -5  -1   10.45    0.87
   7   5  -1   14.66    0.91
   8  -5  -2   76.01    2.63
   8   5  -2   71.14    2.50
   9  -5  -3   -0.90    0.73
   9   5  -3    0.93    0.70
  10  -5  -4   40.85    2.04
  10   5  -4   40.69    1.95
  11  -5  -5   10.85    1.36
  12  -5  -6   21.27    1.97
  13  -5  -7    3.83    2.00
  -3  -6   9    1.31    2.07
  -3   6   9    2.16    3.14
   3   6  -9    4.39    3.31
  -2  -6   8    3.34    1.88
  -2   6   8    5.55    2.65
   2   6  -8    5.83    2.88
   1  -6  -7    4.57    2.19
  -1  -6   7    7.24    1.86
  -1   6   7    9.03    2.29
   1   6  -7    4.04    2.23
   0  -6  -6    1.50    1.60
   0  -6   6    1.31    1.67
   0   6  -6    0.58    1.80
   0   6   6    1.68    1.76
   1  -6   5    4.94    1.51
  -1  -6  -5    4.00    1.29
  -1   6  -5   -0.36    1.60
   1   6   5    5.97    1.56
  -2  -6  -4    9.98    1.20
   2  -6   4    9.16    1.44
  -2   6  -4   10.15    1.59
   3  -6   3   32.23    1.92
  -3  -6  -3   36.40    1.77
  -3   6  -3   34.71    2.31
   4  -6   2   10.87    1.02
   4   6   2   10.84    0.94
  -4   6  -2   11.22    1.37
   5  -6   1    9.61    0.88
  -5   6  -1    9.90    1.34
   5   6   1    8.27    0.83
   6  -6   0  208.14    6.37
   6   6   0  208.89    6.34
   7  -6  -1   10.89    0.93
   7   6  -1   12.30    0.90
   8  -6  -2    0.77    0.73
   8   6  -2    1.21    0.67
   9  -6  -3    4.99    0.91
   9   6  -3    9.07    0.92
  10  -6  -4   52.13    2.43
  10   6  -4   56.52    2.31
  11  -6  -5    0.30    1.11
  12  -6  -6    3.59    1.51
  13  -6  -7    2.88    2.02
   3   7  -9    2.54    3.50
  -2  -7   8   19.70    2.41
   2   7  -8   16.67    3.13
  -1  -7   7   27.09    2.61
   1   7  -7   24.48    2.79
   0  -7   6   18.01    2.18
   0  -7  -6   22.20    2.05
   0   7  -6   17.24    2.29
  -1  -7  -5    6.52    1.42
   1  -7   5    6.29    1.66
  -1   7  -5    5.23    1.75
   2  -7   4    2.26    1.25
  -2  -7  -4    0.90    1.05
  -2   7  -4   -1.41    1.41
   3  -7   3    3.36    1.06
   3   7   3    0.76    0.85
  -3   7  -3    1.08    1.33
   4  -7   2   58.11    2.37
  -4   7  -2   63.74    2.81
   4   7   2   58.58    2.30
   5  -7   1   11.02    1.00
  -5   7  -1   10.51    1.38
   5   7   1   11.58    0.98
   6  -7   0   40.23    1.73
  -6   7   0   39.70    2.33
   6   7   0   35.15    1.68
   7  -7  -1   11.69    1.03
   7   7  -1   11.14    0.98
   8  -7  -2   28.85    1.58
   8   7  -2   28.59    1.50
   9  -7  -3   12.01    1.17
   9   7  -3   14.42    1.17
  10  -7  -4   32.44    2.08
  10   7  -4   38.17    2.02
  11  -7  -5    3.20    1.24
  12  -7  -6   12.25    1.82
  13  -7  -7    5.69    2.66
  -2  -8   8    3.50    2.26
   2   8  -8    2.99    2.98
  -1  -8   7    1.69    2.00
   1   8  -7   -0.98    2.38
   0  -8   6    0.66    1.88
   0   8  -6    2.17    2.02
   0   8   6    2.48    1.73
   1  -8   5   24.02    2.23
  -1   8  -5   23.95    2.29
   1   8   5   26.58    1.96
   2  -8   4    3.73    1.46
   2   8   4    5.38    1.24
  -2   8  -4    6.12    1.65
   3  -8   3    1.95    1.10
   3   8   3    2.53    0.99
  -3   8  -3    2.89    1.40
   4  -8   2   53.92    2.29
   4   8   2   53.94    2.25
  -4   8  -2   52.45    2.72
   5  -8   1   25.18    1.59
   5   8   1   25.61    1.52
  -5   8  -1   29.52    1.84
   6  -8   0    3.25    0.83
  -6   8   0    4.42    1.36
   6   8   0    3.93    0.86
   7  -8  -1    8.85    0.96
   7   8  -1    7.73    0.94
   8  -8  -2  113.10    3.92
   8   8  -2  118.16    3.86
   9  -8  -3    6.35    1.08
   9   8  -3    4.00    0.99
  10  -8  -4    1.73    1.12
  10   8  -4   -0.34    1.14
  11  -8  -5    1.74    1.31
  12  -8  -6    9.25    1.79
  -2  -9   8    4.94    2.52
   2   9  -8    5.19    3.42
  -1  -9   7    0.86    2.25
   1   9  -7    4.42    2.65
   0  -9   6   14.40    2.37
   0   9   6   11.66    2.03
   0   9  -6   10.35    2.28
   1  -9   5   10.16    2.08
  -1   9  -5   10.55    2.06
   1   9   5   12.09    1.76
   2  -9   4   44.70    2.81
  -2   9  -4   36.50    2.64
   2   9   4   45.08    2.48
   3  -9   3    6.61    1.32
  -3   9  -3    3.94    1.57
   3   9   3    5.48    1.20
   4  -9   2    4.65    1.05
  -4   9  -2    3.28    1.41
   4   9   2    4.65    1.03
   5  -9   1    9.49    1.08
   5   9   1    9.82    1.10
  -5   9  -1    9.97    1.56
   6  -9   0   25.16    1.62
  -6   9   0   25.17    1.96
   6   9   0   24.14    1.60
   7  -9  -1   10.99    1.17
   7   9  -1    9.93    1.12
   8  -9  -2   26.52    1.64
   8   9  -2   24.57    1.71
   9  -9  -3    5.02    1.15
   9   9  -3    2.15    1.05
  10   9  -4   10.17    1.47
  11  -9  -5    9.80    1.63
  12  -9  -6    9.22    1.95
  -1 -10   7    7.36    2.67
   1  10  -7    7.13    2.83
   0 -10   6   -0.93    2.25
   0  10   6    0.17    2.03
   0  10  -6    0.95    2.25
   1 -10   5    3.45    2.05
  -1  10  -5    2.39    2.06
   1  10   5    2.79    1.79
   2 -10   4    0.82    1.60
   2  10   4    2.24    1.48
  -2  10  -4    1.81    1.78
   3 -10   3   32.28    2.15
   3  10   3   36.89    2.26
  -3  10  -3   34.74    2.45
   4 -10   2    4.69    1.16
  -4  10  -2    6.39    1.66
   4  10   2    5.08    1.17
   5 -10   1    2.69    1.04
   5  10   1    2.70    1.02
  -5  10  -1    3.33    1.52
   6 -10   0   66.08    2.65
   6  10   0   63.79    2.64
   7 -10  -1   16.50    1.40
   7  10  -1   15.77    1.37
   8 -10  -2    0.67    1.04
   8  10  -2   -0.43    1.03
   9 -10  -3    3.00    1.23
   9  10  -3    5.84    1.26
  10 -10  -4   30.47    2.05
  10  10  -4   27.87    2.01
  11 -10  -5   -1.37    1.49
  11  10  -5    2.33    1.86
  -1 -11   7   15.12    4.85
   1  11  -7   19.33    4.90
   0 -11   6   14.60    2.91
   0  11  -6   12.74    2.67
   1 -11   5    3.16    2.19
  -1  11  -5   -0.07    2.15
   1  11   5    3.38    1.99
   2 -11   4    4.07    1.85
  -2  11  -4    2.11    1.93
   2  11   4    3.68    1.70
   3 -11   3    2.28    1.49
   3  11   3    1.78    1.42
  -3  11  -3    1.36    1.82
   4 -11   2   27.98    1.96
   4  11   2   29.59    1.96
  -4  11  -2   31.95    2.35
   5 -11   1    6.93    1.27
  -5  11  -1    3.61    1.72
   5  11   1    7.24    1.33
   6 -11   0   12.33    1.34
   6  11   0   10.13    1.31
   7 -11  -1   13.42    1.44
   7  11  -1   14.67    1.45
   8 -11  -2    4.10    1.27
   8  11  -2    3.58    1.23
   9 -11  -3    7.91    1.47
   9  11  -3    9.29    1.53
  10 -11  -4   10.67    1.73
  10  11  -4   11.53    1.82
  11  11  -5    2.68    2.12
   0 -12   6    2.28    3.06
   0  12  -6    1.93    2.81
   1 -12   5   17.96    2.85
   1  12   5   20.94    2.55
  -1  12  -5   16.91    2.82
   2 -12   4   -0.49    2.03
  -2  12  -4    1.94    2.20
   2  12   4    4.28    1.92
   3 -12   3    3.12    1.68
   3  12   3    3.83    1.76
  -3  12  -3    1.67    2.09
   4 -12   2    7.27    1.62
  -4  12  -2    7.16    2.10
   4  12   2    9.99    1.64
   5 -12   1   23.52    1.88
   5  12   1   22.39    1.81
  -5  12  -1   17.18    2.29
   6 -12   0    1.75    1.29
   6  12   0    1.70    1.30
   7 -12  -1    4.10    1.32
   7  12  -1    3.90    1.40
   8 -12  -2   30.93    2.13
   8  12  -2   33.58    2.14
   9 -12  -3    7.29    1.60
   9  12  -3    5.89    1.65
  10 -12  -4    1.59    1.85
  10  12  -4    2.20    1.81
   1 -13   5    0.31    2.92
  -1  13  -5    0.53    2.72
   2 -13   4   25.60    2.84
   2  13   4   26.61    2.65
  -2  13  -4   20.18    2.94
   3 -13   3    4.60    2.09
   3  13   3    4.03    1.90
  -3  13  -3    4.96    2.31
   4 -13   2    2.67    1.78
   4  13   2    3.48    1.73
  -4  13  -2    0.82    2.26
   5 -13   1   12.70    1.82
   5  13   1   13.52    1.81
   6 -13   0    9.17    1.62
   6  13   0    6.53    1.57
   7 -13  -1    4.38    1.53
   7  13  -1    4.27    1.54
   8 -13  -2    6.44    1.66
   8  13  -2    5.55    1.72
   9 -13  -3    5.43    2.00
   9  13  -3    6.32    1.92
   2  14   4    1.45    2.58
  -2  14  -4    4.17    3.13
   3 -14   3   18.20    2.69
  -3  14  -3   18.49    3.09
   3  14   3   22.12    2.53
   4 -14   2    2.28    2.11
  -4  14  -2    5.85    2.77
   4  14   2    2.89    2.02
   5 -14   1    2.61    1.86
   5  14   1   -0.02    1.79
   6 -14   0   12.01    1.91
   6  14   0   10.34    1.91
   7 -14  -1   12.51    1.94
   7  14  -1    6.54    1.83
  -3   0  10   -1.09    2.68
   2   0  -9    2.98    2.65
  -2   0   9   -5.61    2.16
   1   0  -8    3.23    2.13
  -1   0   8   -0.50    1.85
   0   0  -7   30.80    2.44
   0   0   7   37.13    2.46
  -1   0  -6   -0.40    1.52
   1   0   6   -1.04    1.38
   2   0   5   13.19    1.45
  -2   0  -5   13.28    1.71
  -3   0  -4    2.12    1.25
   3   0   4    0.93    1.01
  -4   0  -3   85.15    3.29
   4   0   3   86.97    2.98
  -5   0  -2    3.03    0.96
   5   0   2    2.18    0.59
   6   0   1    0.22    0.45
  -6   0  -1   -0.05    0.70
   7   0   0   11.90    0.73
  -7   0   0   13.88    0.91
  -8   0   1    4.85    0.65
   8   0  -1    4.72    0.63
   9   0  -2    2.66    0.76
  10   0  -3   -1.09    0.96
  11   0  -4   36.11    2.32
  12   0  -5   30.38    2.44
  -3  -1  10   -0.82    2.57
  -3   1  10   -1.94    2.74
  -2  -1   9   16.66    2.42
   2  -1  -9   12.75    2.96
  -2   1   9    9.51    2.45
   2   1  -9   13.10    2.79
   1  -1  -8    7.55    2.31
  -1  -1   8   13.63    2.01
   1   1  -8    9.05    2.21
  -1   1   8   11.26    2.15
   0  -1  -7   28.77    2.43
   0  -1   7   28.44    2.15
   0   1  -7   29.87    2.37
   0   1   7   23.17    2.19
  -1  -1  -6   34.83    2.42
   1  -1   6   35.71    2.38
   1   1   6   32.53    2.16
  -1   1  -6   31.69    2.31
   2  -1   5   20.98    1.72
  -2  -1  -5   25.52    2.00
   2   1   5   23.52    1.74
  -2   1  -5   23.42    1.98
   3  -1   4   34.14    2.03
  -3  -1  -4   32.19    2.24
   3   1   4   38.53    2.01
  -3   1  -4   35.45    2.31
   4  -1   3    9.51    1.03
  -4  -1  -3    9.07    1.23
  -4   1  -3   10.12    1.31
   4   1   3    8.69    0.94
   5  -1   2   22.84    1.20
  -5  -1  -2   23.43    1.53
  -5   1  -2   21.72    1.51
   5   1   2   23.40    1.10
   6  -1   1    9.88    0.70
  -6  -1  -1   10.65    0.92
  -6   1  -1   12.18    1.08
   6   1   1    8.50    0.56
  -7  -1   0    5.53    0.70
   7  -1   0    6.45    0.62
   7   1   0    5.30    0.54
  -7   1   0    5.72    0.77
   8  -1  -1   17.95    1.04
  -8  -1   1   17.46    1.02
   8   1  -1   14.36    1.00
  -8   1   1   15.41    1.05
   9  -1  -2    0.29    0.66
   9   1  -2   -0.38    0.53
   9   1  -2    0.36    0.80
  10  -1  -3   23.53    1.42
  10   1  -3   19.31    1.56
  11  -1  -4    1.87    1.21
  12  -1  -5   22.44    2.03
  13  -1  -6    2.27    2.14
  -3   2  10   -1.97    2.98
  -2  -2   9    7.50    2.15
  -2   2   9    6.05    2.51
   2   2  -9    8.50    2.74
   1  -2  -8   -0.53    2.22
  -1  -2   8    0.53    1.68
  -1   2   8   -1.05    1.97
   1   2  -8    0.96    2.12
   0  -2   7    9.29    1.66
   0  -2  -7    8.92    2.01
   0   2  -7    2.87    1.93
   0   2   7   10.18    1.92
  -1  -2  -6    2.96    1.70
   1  -2   6    3.21    1.47
   1   2   6    1.82    1.53
  -1   2  -6    4.35    1.70
   2  -2   5   81.67    3.54
  -2  -2  -5   93.45    3.74
  -2   2  -5   94.40    3.78
   2   2   5   91.18    3.53
   3  -2   4    0.90    1.09
  -3  -2  -4   -0.06    1.14
   3   2   4    0.29    1.09
  -3   2  -4    4.27    1.36
  -4  -2  -3    3.93    1.03
   4  -2   3    5.52    0.93
   4   2   3    4.39    0.86
  -4   2  -3    4.64    1.29
  -5  -2  -2    3.72    0.85
   5  -2   2    4.50    0.71
  -5   2  -2    3.40    1.11
   5   2   2    2.35    0.50
   6  -2   1   30.13    1.34
  -6  -2  -1   31.83    1.49
  -6   2  -1   32.10    1.80
  -7  -2   0    4.85    0.67
   7  -2   0    4.30    0.62
  -7   2   0    4.69    0.85
   8  -2  -1    0.52    0.62
   8   2  -1    0.35    0.54
  -8   2   1    0.91    0.65
   9  -2  -2   28.35    1.48
   9   2  -2   29.45    1.29
  10  -2  -3   37.47    1.86
  11  -2  -4    5.57    1.22
  12  -2  -5    2.33    1.49
  13  -2  -6   13.37    2.21
  14  -2  -7    5.72    2.75
   3   3 -10    4.75    4.46
  -3   3  10    3.17    3.23
  -2  -3   9   14.04    2.21
  -2   3   9   12.54    2.77
   2   3  -9   10.96    2.96
   1  -3  -8    9.90    2.61
  -1  -3   8   11.78    1.91
   1   3  -8   13.87    2.44
  -1   3   8   14.39    2.42
   0  -3   7   19.54    1.94
   0  -3  -7   18.30    2.36
   0   3   7   17.65    2.21
   0   3  -7   18.26    2.26
   1  -3   6   25.44    2.03
  -1  -3  -6   26.37    2.30
  -1   3  -6   23.04    2.25
   1   3   6   31.42    2.16
   2  -3   5   26.87    1.97
  -2  -3  -5   30.65    2.10
   2   3   5   31.49    2.01
  -2   3  -5   32.67    2.19
   3  -3   4   56.65    2.59
  -3  -3  -4   53.22    2.61
  -3   3  -4   55.31    2.84
   3   3   4   54.04    2.49
   4  -3   3    8.08    1.05
  -4  -3  -3    8.75    1.12
  -4   3  -3    8.76    1.40
   4   3   3    7.05    1.07
  -5  -3  -2   25.63    1.52
   5  -3   2   25.86    1.38
  -5   3  -2   29.94    1.84
   6  -3   1    3.17    0.66
  -6  -3  -1    2.98    0.70
  -6   3  -1    2.36    1.07
  -7  -3   0    4.39    0.67
   7  -3   0    3.32    0.65
  -7   3   0    4.07    0.92
   8  -3  -1   26.45    1.28
   8   3  -1   23.17    1.20
   9  -3  -2    5.18    0.79
   9   3  -2    4.40    0.67
  10  -3  -3   20.75    1.34
  11  -3  -4    1.73    1.12
  12  -3  -5   18.22    1.75
  13  -3  -6    5.78    1.91
  14  -3  -7   11.78    2.67
   3   4 -10    0.94    3.95
  -3   4  10   -3.35    4.04
  -2  -4   9    2.51    2.02
  -2   4   9    0.01    2.75
   2   4  -9    0.98    2.94
   1  -4  -8    3.64    2.64
  -1  -4   8    6.61    1.88
   1   4  -8    5.62    2.39
  -1   4   8    2.40    2.30
   0  -4  -7   30.48    2.71
   0  -4   7   27.89    2.22
   0   4  -7   30.51    2.73
   0   4   7   29.00    2.54
  -1  -4  -6   -1.39    1.64
   1  -4   6   -1.19    1.42
   1   4   6    1.19    1.69
  -1   4  -6    0.57    1.77
  -2  -4  -5   11.83    1.62
   2  -4   5   11.93    1.69
   2   4   5   10.21    1.60
  -2   4  -5    7.64    1.77
  -3  -4  -4    7.54    1.28
   3  -4   4    7.71    1.29
  -3   4  -4    5.75    1.52
  -4  -4  -3   92.60    3.40
   4  -4   3   95.99    3.41
  -4   4  -3   99.86    3.84
  -5  -4  -2   15.23    1.09
   5  -4   2   15.37    1.08
  -5   4  -2    9.94    1.54
  -6  -4  -1   -0.67    0.64
   6  -4   1    0.35    0.64
  -6   4  -1   -0.19    1.12
   7  -4   0   19.00    1.16
   7   4   0   16.24    1.12
  -7   4   0   17.69    1.41
   8  -4  -1    4.50    0.75
   8   4  -1    3.85    0.68
   9  -4  -2   11.74    1.00
   9   4  -2   13.09    0.94
  10  -4  -3   -0.06    0.85
  10   4  -3    0.44    0.74
  11  -4  -4   29.16    1.78
  12  -4  -5   31.56    2.09
  13  -4  -6    2.91    1.74
  14  -4  -7    2.47    2.35
  -2  -5   9   12.46    2.26
  -2   5   9   13.70    3.31
   2   5  -9    5.81    3.16
  -1  -5   8    7.38    1.88
   1  -5  -8    9.77    3.63
   1   5  -8    8.03    2.63
  -1   5   8    9.19    2.65
   0  -5   7   27.64    2.31
   0  -5  -7   28.01    2.81
   0   5   7   34.03    2.85
   0   5  -7   22.12    2.75
   1  -5   6   29.08    2.31
  -1  -5  -6   29.99    2.35
  -1   5  -6   27.80    2.62
  -2  -5  -5   11.00    1.62
   2  -5   5    5.39    1.54
  -2   5  -5    4.98    1.76
   3  -5   4   23.67    1.78
  -3  -5  -4   26.04    1.73
  -3   5  -4   24.21    2.16
  -4  -5  -3   12.95    1.21
   4  -5   3   17.69    1.38
  -4   5  -3   14.26    1.73
  -5  -5  -2   20.76    1.38
   5  -5   2   22.32    1.36
  -5   5  -2   18.45    1.84
   6  -5   1   19.00    1.28
  -6   5  -1   21.11    1.74
   6   5   1   17.09    1.12
   7  -5   0   11.24    0.94
   7   5   0   11.12    0.93
  -7   5   0   12.02    1.39
   8  -5  -1    5.70    0.83
   8   5  -1    5.44    0.74
   9  -5  -2    6.85    0.95
   9   5  -2    6.40    0.82
  10  -5  -3   22.25    1.46
  10   5  -3   21.88    1.41
  11  -5  -4    7.88    1.21
  12  -5  -5   13.92    1.62
  13  -5  -6    0.14    1.66
  14  -5  -7   11.76    2.49
  -2  -6   9    4.46    2.18
   2   6  -9    2.47    3.27
  -1  -6   8    0.96    1.86
   1   6  -8    9.50    2.90
   0  -6   7    6.75    1.89
   0  -6  -7    4.53    2.28
   0   6  -7    3.41    2.41
  -1  -6  -6    6.77    1.80
   1  -6   6    3.10    1.71
  -1   6  -6    6.07    2.11
  -2  -6  -5   57.48    2.88
   2  -6   5   62.06    3.17
  -2   6  -5   56.93    3.48
   3  -6   4    5.71    1.35
  -3  -6  -4    7.66    1.29
  -3   6  -4    4.37    1.70
  -4  -6  -3    1.21    0.90
   4  -6   3    1.86    1.07
  -4   6  -3    0.96    1.47
   5  -6   2   14.76    1.18
  -5  -6  -2   16.12    1.16
   5   6   2   14.00    1.11
  -5   6  -2   12.47    1.66
   6  -6   1   26.10    1.57
  -6   6  -1   35.44    2.37
   6   6   1   30.59    1.55
   7  -6   0   24.23    1.46
  -7   6   0   24.94    1.94
   7   6   0   25.33    1.42
   8  -6  -1    1.72    0.77
   8   6  -1    1.29    0.72
   9  -6  -2   22.70    1.42
   9   6  -2   20.69    1.36
  10  -6  -3   31.91    1.79
  10   6  -3   25.70    1.65
  11  -6  -4    6.06    1.21
  12  -6  -5    2.81    1.37
  13  -6  -6   11.18    1.97
  -1  -7   8    1.61    2.07
   1   7  -8    5.24    3.00
   0  -7   7    4.89    2.00
   0  -7  -7    9.90    2.47
   0   7  -7    5.65    2.59
   1  -7   6    8.18    1.97
  -1  -7  -6    7.87    1.89
  -1   7  -6    5.32    2.17
  -2  -7  -5   24.48    1.95
   2  -7   5   25.47    2.19
  -2   7  -5   24.80    2.38
   3  -7   4   22.73    1.98
  -3  -7  -4   25.51    1.72
  -3   7  -4   23.57    2.22
   4  -7   3    6.72    1.25
  -4   7  -3    5.23    1.64
   4   7   3    4.25    1.09
   5  -7   2   11.53    1.16
  -5   7  -2   10.75    1.68
   5   7   2   10.23    1.05
   6  -7   1   -0.13    0.78
   6   7   1    0.11    0.78
  -6   7  -1    0.18    1.43
   7  -7   0    1.70    0.83
  -7   7   0    0.46    1.56
   7   7   0    1.45    0.79
   8  -7  -1   28.17    1.60
   8   7  -1   24.89    1.53
   9  -7  -2    9.24    1.11
   9   7  -2    8.46    1.01
  10  -7  -3    7.66    1.15
  10   7  -3    7.75    1.09
  11  -7  -4    8.54    1.35
  11   7  -4   12.67    1.70
  12  -7  -5    7.99    1.57
  13  -7  -6    9.89    1.98
  -1  -8   8    4.41    2.35
   1   8  -8    7.37    3.33
   0  -8  -7   11.85    2.73
   0  -8   7   13.74    2.43
   0   8   7   12.05    2.43
   0   8  -7   10.66    2.75
  -1  -8  -6   -0.36    1.90
   1  -8   6    0.49    1.90
  -1   8  -6    2.06    2.18
   1   8   6   -0.40    1.89
   2  -8   5    5.01    1.88
  -2   8  -5    4.61    2.07
   2   8   5    4.61    1.62
   3  -8   4   10.81    1.69
  -3   8  -4   10.88    2.00
   3   8   4   11.64    1.54
   4  -8   3   53.30    2.62
  -4   8  -3   48.47    3.11
   4   8   3   48.61    2.37
   5  -8   2   23.86    1.60
   5   8   2   23.50    1.51
  -5   8  -2   22.28    2.09
   6  -8   1    1.99    0.94
   6   8   1    1.28    0.87
  -6   8  -1    2.36    1.53
   7  -8   0   13.38    1.19
   7   8   0   16.42    1.22
   8  -8  -1    8.42    1.09
   8   8  -1    9.11    1.11
   9  -8  -2   20.40    1.48
   9   8  -2   18.19    1.35
  10  -8  -3    0.46    1.05
  10   8  -3    1.37    1.03
  11  -8  -4   13.47    1.57
  11   8  -4   16.66    1.63
  12  -8  -5   16.30    1.83
  13  -8  -6    5.93    2.00
   1   9  -8    5.71    5.36
   0  -9   7   14.99    2.60
   0   9  -7    9.02    2.92
   1  -9   6   17.27    2.50
  -1   9  -6   13.23    2.57
   1   9   6   15.49    2.31
   2  -9   5    2.87    1.99
  -2   9  -5    0.43    2.07
   2   9   5    0.27    1.71
   3  -9   4    4.08    1.67
   3   9   4    6.31    1.57
  -3   9  -4    6.16    2.03
   4  -9   3   10.19    1.48
  -4   9  -3    7.94    1.88
   4   9   3   11.76    1.42
   5  -9   2    5.25    1.16
  -5   9  -2    2.55    1.71
   5   9   2    6.12    1.18
   6  -9   1   15.99    1.38
   6   9   1   18.73    1.42
  -6   9  -1   17.59    2.00
   7  -9   0    4.86    1.04
   7   9   0    5.73    1.05
   8  -9  -1    1.49    0.98
   8   9  -1    0.87    0.98
   9  -9  -2   16.86    1.49
   9   9  -2   16.17    1.42
  10  -9  -3   13.46    1.50
  10   9  -3   12.38    1.38
  11  -9  -4    7.59    1.52
  11   9  -4    6.73    1.56
  12  -9  -5    4.29    1.64
   0 -10   7    2.40    2.73
   0  10  -7    4.29    3.04
   1 -10   6    7.85    2.50
  -1  10  -6    5.35    2.64
   1  10   6    4.34    2.33
   2 -10   5   23.89    2.61
  -2  10  -5   20.05    2.65
   2  10   5   30.61    2.45
   3 -10   4    8.11    1.85
   3  10   4    8.22    1.73
  -3  10  -4    5.88    2.07
   4 -10   3    1.05    1.34
  -4  10  -3    1.87    1.84
   4  10   3   -0.38    1.36
   5 -10   2   18.20    1.65
   5  10   2   19.33    1.64
  -5  10  -2   16.45    2.09
   6 -10   1   15.09    1.48
   6  10   1   19.52    1.54
  -6  10  -1   16.00    2.10
   7 -10   0   30.26    2.02
   7  10   0   27.99    1.96
   8 -10  -1    2.45    1.13
   8  10  -1    2.70    1.13
   9 -10  -2    9.08    1.42
   9  10  -2   10.72    1.37
  10 -10  -3   13.46    1.59
  10  10  -3   11.00    1.53
  11 -10  -4   10.94    1.76
  11  10  -4   10.72    1.80
  12 -10  -5    3.69    2.27
   1 -11   6   -0.71    2.76
  -1  11  -6    5.78    2.90
   1  11   6    4.12    2.66
   2 -11   5   20.24    2.76
   2  11   5   15.93    2.40
  -2  11  -5   14.92    2.76
   3 -11   4   15.24    2.25
   3  11   4   19.48    2.21
  -3  11  -4   15.92    2.55
   4 -11   3    7.79    1.69
  -4  11  -3    4.48    2.12
   4  11   3    6.79    1.63
   5 -11   2    0.03    1.30
   5  11   2    1.56    1.40
  -5  11  -2    5.53    2.08
   6 -11   1    0.81    1.18
   6  11   1    0.95    1.26
   7 -11   0    3.58    1.27
   7  11   0    3.38    1.29
   8 -11  -1   15.55    1.61
   8  11  -1   16.48    1.63
   9 -11  -2    6.09    1.45
   9  11  -2    5.53    1.42
  10 -11  -3    2.73    1.45
  10  11  -3    1.26    1.50
  11 -11  -4   14.24    2.00
  11  11  -4   13.38    2.08
   2 -12   5    3.76    2.66
  -2  12  -5    2.24    2.79
   2  12   5    1.23    2.36
   3 -12   4   15.80    2.46
  -3  12  -4   11.72    2.73
   3  12   4   16.31    2.30
   4 -12   3   23.60    2.37
  -4  12  -3   24.88    2.80
   4  12   3   25.77    2.31
   5 -12   2   19.91    1.98
   5  12   2   22.14    2.10
  -5  12  -2   19.87    2.70
   6 -12   1   -0.84    1.37
   6  12   1    1.15    1.37
   7 -12   0   10.29    1.56
   7  12   0    9.36    1.55
   8 -12  -1    5.90    1.48
   8  12  -1    6.35    1.50
   9 -12  -2   16.42    1.88
   9  12  -2   18.68    1.85
  10 -12  -3    2.23    1.67
  10  12  -3    1.54    1.71
   2  13   5    1.92    2.91
   3 -13   4   -1.47    2.42
   3  13   4    0.52    2.40
  -3  13  -4   -1.69    2.72
   4 -13   3    4.98    2.29
  -4  13  -3    5.27    2.78
   4  13   3    6.99    2.23
   5 -13   2    1.01    1.85
   5  13   2    3.20    1.84
  -5  13  -2    0.46    2.82
   6 -13   1   10.33    1.83
   6  13   1   12.06    1.78
   7 -13   0   -0.30    1.50
   7  13   0    2.11    1.64
   8 -13  -1    5.31    1.62
   8  13  -1   -1.05    1.61
   9 -13  -2   12.31    2.22
   9  13  -2   15.84    2.05
   4  14   3   -0.04    2.43
  -4  14  -3    4.01    3.25
   5  14   2   12.77    2.28
   6 -14   1   11.21    2.33
   6  14   1   14.39    2.25
  -2   0  10    7.12    2.82
  -1   0   9    0.79    2.16
   1   0  -9    3.38    2.76
   0   0  -8    0.20    2.08
   0   0   8    0.36    1.81
  -1   0  -7    1.26    1.87
   1   0   7    7.58    1.73
  -2   0  -6    0.00    1.62
   2   0   6    5.97    1.47
  -3   0  -5    2.00    1.49
   3   0   5    5.73    1.35
   4   0   4   69.40    2.82
  -4   0  -4   72.21    3.18
  -5   0  -3    2.82    1.20
   5   0   3    3.80    0.89
   6   0   2   22.36    1.18
  -6   0  -2   20.06    1.48
  -7   0  -1   10.80    1.08
   7   0   1    9.47    0.74
   8   0   0  137.44    4.24
  -8   0   0  138.71    4.37
   9   0  -1    2.18    1.07
  -9   0   1    2.51    0.73
  -2   1  10   -1.22    2.81
  -1  -1   9   21.40    2.43
   1  -1  -9   20.47    3.01
  -1   1   9   21.68    2.68
   1   1  -9   13.06    2.92
   0  -1  -8    5.70    2.39
   0  -1   8    7.37    1.85
   0   1   8    2.62    2.05
   0   1  -8    6.74    2.18
  -1  -1  -7   16.75    2.27
   1  -1   7   25.24    2.06
   1   1   7   20.27    2.07
  -1   1  -7   17.90    2.16
  -2  -1  -6   33.39    2.51
   2  -1   6   44.03    2.51
  -2   1  -6   34.70    2.50
   2   1   6   34.70    2.19
   3  -1   5   10.38    1.47
  -3  -1  -5   10.14    1.80
   3   1   5   15.69    1.55
  -3   1  -5   14.87    1.84
  -4  -1  -4   48.81    2.67
   4  -1   4   48.36    2.39
   4   1   4   49.24    2.33
  -4   1  -4   52.00    2.73
  -5  -1  -3    4.64    1.14
   5  -1   3    2.25    0.90
  -5   1  -3    3.72    1.31
   5   1   3    2.31    0.86
   6  -1   2   62.57    2.17
  -6  -1  -2   62.27    2.53
  -6   1  -2   53.68    2.64
   7  -1   1    5.95    0.72
  -7  -1  -1    4.85    0.91
  -7   1  -1    5.06    1.02
  -8  -1   0   37.08    1.68
   8  -1   0   38.66    1.58
  -8   1   0   39.61    1.77
   9  -1  -1    0.00    0.70
  -9  -1   1    1.09    0.70
  -9   1   1    0.28    0.70
  10  -1  -2   25.12    1.57
  11  -1  -3    1.51    1.14
  12  -1  -4   19.71    1.95
   2   2 -10    2.57    3.56
  -2   2  10   -4.00    2.97
   1  -2  -9   -1.69    2.85
  -1  -2   9    4.10    2.10
   1   2  -9    2.72    2.61
  -1   2   9   -6.56    2.40
   0  -2  -8    2.86    2.35
   0  -2   8    2.52    1.79
   0   2   8   -1.74    2.08
   0   2  -8    1.20    2.13
   1  -2   7    3.21    1.58
  -1  -2  -7   -0.20    1.84
   1   2   7   -2.90    1.78
  -1   2  -7    1.50    1.85
   2  -2   6   15.58    1.76
  -2  -2  -6   14.12    1.97
   2   2   6   16.51    1.87
  -2   2  -6   16.87    2.04
   3  -2   5   10.23    1.55
  -3  -2  -5    9.00    1.66
  -3   2  -5    9.25    1.69
   3   2   5   11.24    1.49
  -4  -2  -4   19.94    1.73
   4  -2   4   18.51    1.56
   4   2   4   20.29    1.61
  -4   2  -4   22.32    1.88
  -5  -2  -3   10.10    1.33
   5  -2   3    9.82    1.10
  -5   2  -3    7.04    1.41
  -6  -2  -2  151.65    4.85
   6  -2   2  148.42    4.65
  -6   2  -2  146.58    5.05
  -7  -2  -1   -0.46    0.75
   7  -2   1   -0.98    0.62
  -7   2  -1   -0.45    1.01
   8  -2   0    9.22    0.84
  -8  -2   0    8.48    0.89
  -8   2   0    7.47    1.00
   9  -2  -1    2.26    0.76
   9   2  -1    1.62    0.63
  10  -2  -2   33.13    1.83
  10   2  -2   40.34    1.62
  11  -2  -3    0.03    1.00
  12  -2  -4    0.25    1.37
  13  -2  -5   12.08    1.96
  -2   3  10   -4.98    3.44
  -1  -3   9   20.84    2.42
  -1   3   9   15.76    2.98
   1   3  -9   14.27    3.07
   0  -3   8   14.57    2.11
   0  -3  -8   12.53    2.76
   0   3  -8    9.75    2.40
   0   3   8   11.23    2.45
   1  -3   7   22.95    2.06
  -1  -3  -7   16.38    2.40
  -1   3  -7   16.56    2.31
   1   3   7   17.01    2.26
  -2  -3  -6   19.80    2.23
   2  -3   6   18.82    1.89
  -2   3  -6   15.66    2.09
   2   3   6   15.53    2.19
   3  -3   5    1.97    1.43
  -3  -3  -5    3.31    1.55
  -3   3  -5    2.94    1.54
  -4  -3  -4   54.64    2.75
   4  -3   4   51.33    2.59
  -4   3  -4   60.38    3.02
  -5  -3  -3   14.07    1.38
   5  -3   3   16.57    1.31
  -5   3  -3   13.56    1.66
   6  -3   2   51.28    2.11
  -6  -3  -2   52.63    2.27
  -6   3  -2   55.67    2.72
  -7  -3  -1    4.41    0.87
   7  -3   1    4.13    0.76
  -7   3  -1    4.72    1.17
   8  -3   0   43.07    1.75
  -8  -3   0   40.29    1.81
  -8   3   0   44.57    2.12
   9  -3  -1    8.63    0.95
   9   3  -1    8.70    0.86
  10  -3  -2   24.10    1.42
  10   3  -2   22.06    1.33
  11  -3  -3    5.74    1.13
  12  -3  -4   17.47    1.63
  13  -3  -5    1.88    1.64
  14  -3  -6    0.35    2.14
  -1  -4   9    1.74    2.06
   1   4  -9   -0.23    2.98
   0  -4  -8   -3.03    2.58
   0  -4   8    2.63    1.77
   0   4  -8    0.75    2.46
  -1  -4  -7    6.11    2.24
   1  -4   7    8.12    1.80
  -1   4  -7    6.66    2.09
   2  -4   6    3.61    1.71
  -2  -4  -6    3.44    1.87
  -2   4  -6   -0.30    1.76
  -3  -4  -5    2.19    1.52
   3  -4   5    2.90    1.50
  -3   4  -5   -1.39    1.58
  -4  -4  -4   64.38    2.98
   4  -4   4   62.25    2.92
  -4   4  -4   71.21    3.34
  -5  -4  -3    3.96    1.06
   5  -4   3    4.31    1.07
  -5   4  -3    3.43    1.50
  -6  -4  -2   20.48    1.40
   6  -4   2   20.21    1.30
  -6   4  -2   21.48    1.87
  -7  -4  -1    7.94    0.94
   7  -4   1    8.25    0.94
  -7   4  -1    7.22    1.35
   8  -4   0  119.51    3.83
  -8   4   0  111.26    4.04
   8   4   0  118.90    3.80
   9  -4  -1    2.48    0.80
   9   4  -1    2.78    0.75
  10  -4  -2    0.30    0.82
  10   4  -2   -0.53    0.72
  11  -4  -3    2.76    1.05
  12  -4  -4    3.18    1.29
  13  -4  -5    2.38    1.62
  14  -4  -6    0.74    2.08
  15  -4  -7   11.35    3.05
  -1  -5   9   11.51    2.36
   1   5  -9   10.62    3.26
   0  -5  -8    1.17    2.94
   0  -5   8    1.86    1.94
   0   5  -8    1.26    2.58
   1  -5   7   14.10    2.07
  -1  -5  -7    7.79    2.42
  -1   5  -7    4.63    2.25
  -2  -5  -6   29.17    2.52
   2  -5   6   33.34    2.48
  -2   5  -6   29.21    2.69
  -3  -5  -5   14.43    1.84
   3  -5   5   12.02    1.81
  -3   5  -5   15.02    2.09
   4  -5   4   27.88    2.00
  -4  -5  -4   29.13    1.90
  -4   5  -4   34.17    2.45
   5  -5   3    4.62    1.18
  -5  -5  -3    3.69    1.04
  -5   5  -3    2.49    1.56
   6  -5   2   36.47    1.87
  -6  -5  -2   38.57    1.90
  -6   5  -2   35.01    2.35
   7  -5   1   19.51    1.30
   7   5   1   20.46    1.29
  -7   5  -1   18.90    1.84
   8  -5   0   29.45    1.68
  -8   5   0   33.51    2.00
   8   5   0   32.35    1.62
   9  -5  -1    0.39    0.79
   9   5  -1    2.35    0.80
  10  -5  -2   19.31    1.38
  10   5  -2   18.91    1.23
  11  -5  -3    8.20    1.24
  12  -5  -4    6.98    1.36
  13  -5  -5   10.68    1.76
  14  -5  -6    2.19    1.98
   1   6  -9    2.69    3.44
   0  -6  -8    6.84    3.17
   0  -6   8    1.71    2.05
   0   6  -8    2.63    2.77
   1  -6   7   -0.24    1.86
  -1  -6  -7    0.53    2.33
  -1   6  -7    1.99    2.41
   2  -6   6    9.12    1.92
  -2  -6  -6    6.62    1.96
  -2   6  -6    5.18    2.16
  -3  -6  -5    8.94    1.70
   3  -6   5   10.16    1.80
  -3   6  -5    7.31    2.07
  -4  -6  -4   12.17    1.48
   4  -6   4   11.21    1.62
  -4   6  -4   14.89    2.06
   5  -6   3    2.89    1.14
  -5  -6  -3    5.17    1.13
  -5   6  -3    2.77    1.68
  -6  -6  -2   89.23    3.31
   6  -6   2   94.14    3.36
  -6   6  -2   89.28    3.96
   6   6   2   95.30    3.32
   7  -6   1    1.35    0.90
  -7   6  -1    0.91    1.56
   7   6   1    0.69    0.85
   8  -6   0    4.07    0.95
   8   6   0    3.88    0.87
   9  -6  -1    4.15    0.94
   9   6  -1    5.00    0.89
  10  -6  -2   30.78    1.85
  10   6  -2   28.98    1.72
  11  -6  -3    0.80    1.09
  11   6  -3    3.67    1.08
  12  -6  -4    0.24    1.25
  13  -6  -5    8.32    1.74
  14  -6  -6   10.22    2.24
   0  -7   8   13.03    2.48
   0   7  -8   12.72    3.20
   1  -7   7    8.28    2.25
  -1  -7  -7    9.13    2.66
  -1   7  -7   10.03    2.76
  -2  -7  -6    5.37    2.01
   2  -7   6    1.39    1.91
  -2   7  -6    4.15    2.27
  -3  -7  -5    1.28    1.53
   3  -7   5    2.37    1.78
  -3   7  -5   -1.45    1.95
  -4  -7  -4   29.17    2.06
   4  -7   4   32.81    2.25
  -4   7  -4   32.51    2.67
   5  -7   3   14.34    1.51
   5   7   3   15.04    1.41
   6  -7   2   24.41    1.60
   6   7   2   27.56    1.74
  -6   7  -2   23.86    2.28
   7  -7   1    7.98    1.13
  -7   7  -1    9.99    1.90
   7   7   1   10.32    1.17
   8  -7   0   14.95    1.31
   8   7   0   15.87    1.26
   9  -7  -1   13.22    1.23
   9   7  -1   13.21    1.19
  10  -7  -2   14.66    1.40
  10   7  -2   14.31    1.24
  11  -7  -3   11.43    1.35
  11   7  -3    8.36    1.24
  12  -7  -4    9.84    1.60
  13  -7  -5    4.39    1.69
  14  -7  -6   -1.04    2.18
   0  -8   8   -1.62    2.40
   0   8  -8    1.71    3.38
  -1  -8  -7    7.31    2.81
   1  -8   7   10.24    2.45
  -1   8  -7    4.19    2.76
   2  -8   6    2.76    2.11
  -2  -8  -6    3.82    2.14
  -2   8  -6    5.88    2.45
   3  -8   5   -1.70    1.80
  -3  -8  -5   -0.44    1.57
   3   8   5    1.19    1.69
  -3   8  -5   -0.66    2.11
   4  -8   4   24.74    2.16
  -4   8  -4   17.45    2.34
   4   8   4   23.56    1.93
   5  -8   3    3.52    1.30
   5   8   3    5.32    1.30
  -5   8  -3    3.38    2.00
   6  -8   2    5.88    1.22
   6   8   2    6.02    1.17
  -6   8  -2    8.25    1.92
   7  -8   1    8.07    1.19
  -7   8  -1    6.38    1.99
   7   8   1    7.17    1.11
   8  -8   0   53.42    2.47
   8   8   0   56.92    2.40
   9  -8  -1    3.15    1.10
   9   8  -1    4.44    1.04
  10  -8  -2    0.72    1.09
  10   8  -2    0.16    1.00
  11  -8  -3    3.19    1.29
  11   8  -3    2.49    1.26
  12  -8  -4    8.55    1.60
  13  -8  -5    0.95    1.70
   1  -9   7    4.15    2.52
  -1   9  -7    6.76    2.98
   1   9   7    4.15    2.71
   2  -9   6   19.84    2.73
  -2   9  -6   14.57    2.78
   2   9   6   15.16    2.47
  -3   9  -5   14.25    2.64
   3   9   5   10.92    2.09
   4  -9   4    6.24    1.78
   4   9   4    9.04    1.72
  -4   9  -4   11.54    2.35
   5  -9   3    5.55    1.47
   5   9   3   11.04    1.55
  -5   9  -3   10.12    2.19
   6  -9   2   14.40    1.55
   6   9   2   10.58    1.38
   7  -9   1   13.14    1.42
   7   9   1   15.36    1.43
   8  -9   0   13.46    1.42
   8   9   0   13.68    1.37
   9  -9  -1    5.58    1.23
   9   9  -1    5.90    1.20
  10  -9  -2    9.57    1.39
  10   9  -2   10.69    1.38
  11  -9  -3    6.20    1.46
  11   9  -3    9.07    1.49
  12  -9  -4    1.70    1.60
  13  -9  -5    8.83    2.48
   1 -10   7   -2.04    4.95
  -1  10  -7    0.14    4.09
   2 -10   6    5.42    2.59
  -2  10  -6    1.02    2.81
   2  10   6   -0.06    2.42
   3 -10   5    8.34    2.38
  -3  10  -5   13.14    2.70
   3  10   5   11.73    2.33
   4 -10   4    3.90    1.85
   4  10   4    5.51    1.81
  -4  10  -4    4.80    2.45
   5 -10   3    4.13    1.56
  -5  10  -3    3.54    2.24
   5  10   3    3.01    1.58
   6 -10   2   29.47    2.03
  -6  10  -2   32.32    2.79
   6  10   2   29.63    2.00
   7 -10   1    0.70    1.18
   7  10   1    1.10    1.24
   8 -10   0    0.02    1.19
   8  10   0    0.06    1.18
   9 -10  -1    5.02    1.32
   9  10  -1    6.83    1.34
  10 -10  -2   18.11    1.76
  10  10  -2   17.20    1.69
  11 -10  -3    1.38    1.50
  11  10  -3    2.13    1.56
  12 -10  -4    1.46    1.74
  12  10  -4    1.45    3.02
   2 -11   6   -1.07    2.94
  -2  11  -6    1.58    3.26
   2  11   6    4.02    2.91
   3 -11   5    4.56    2.56
  -3  11  -5    4.08    2.87
   3  11   5    1.37    2.40
   4 -11   4   12.52    2.29
  -4  11  -4   12.24    2.86
   4  11   4   13.01    2.24
   5 -11   3   10.93    1.93
  -5  11  -3    9.01    2.65
   5  11   3    9.98    1.92
   6 -11   2    7.58    1.63
  -6  11  -2   10.29    2.57
   6  11   2    8.40    1.64
   7 -11   1    7.00    1.49
   7  11   1   12.44    1.61
   8 -11   0    2.97    1.36
   8  11   0    4.10    1.45
   9 -11  -1   10.54    1.62
   9  11  -1   12.74    1.66
  10 -11  -2    2.07    1.56
  10  11  -2    2.53    1.50
  11 -11  -3    7.25    1.77
  11  11  -3    5.34    1.78
  12  11  -4    3.31    2.22
   2  12   6    4.73    3.34
   3 -12   5    2.15    2.96
   3  12   5    0.81    2.74
  -3  12  -5   -0.05    3.18
   4 -12   4    1.96    2.41
   4  12   4    4.83    2.41
  -4  12  -4    0.54    2.88
   5 -12   3    4.04    2.06
  -5  12  -3    4.90    2.81
   5  12   3    7.44    2.10
   6 -12   2    2.25    1.66
   6  12   2    1.11    1.72
   7 -12   1    6.57    1.67
   7  12   1    5.31    1.66
   8 -12   0   22.05    2.05
   8  12   0   22.93    2.02
   9 -12  -1    4.16    1.63
   9  12  -1    3.50    1.62
  10 -12  -2    1.26    1.73
  10  12  -2    2.39    1.76
  -4  13  -4    1.91    3.38
   4  13   4    0.78    2.68
   5 -13   3    8.65    2.62
  -5  13  -3    6.63    3.42
   5  13   3   14.10    2.51
   6 -13   2    3.67    2.07
   6  13   2    3.60    2.01
   7 -13   1    6.49    1.91
   7  13   1    8.97    1.93
   8 -13   0    1.96    1.85
   8  13   0    3.78    1.85
   1   0 -10    7.50    4.37
   0   0   9    7.31    2.31
   0   0  -9    2.46    2.78
   1   0   8    2.07    1.93
  -1   0  -8    1.21    2.30
   2   0   7    6.68    1.78
  -2   0  -7    3.22    1.95
   3   0   6    9.30    1.67
  -3   0  -6    7.02    1.87
  -4   0  -5    1.29    1.52
   4   0   5    2.81    1.42
   5   0   4    4.40    1.27
  -5   0  -4    2.82    1.45
  -6   0  -3   11.94    1.52
  -7   0  -2    8.41    1.30
  -8   0  -1   52.87    2.33
  -9   0   0   -0.78    0.85
 -10   0   1   12.60    1.15
   0  -1  -9    6.38    2.87
   0  -1   9    8.51    2.27
   0   1   9    6.44    2.43
   0   1  -9    8.40    2.81
  -1  -1  -8   17.98    2.60
   1  -1   8   20.84    2.27
   1   1   8   20.92    2.34
  -1   1  -8   16.47    2.59
   2  -1   7    3.76    1.70
  -2  -1  -7    1.13    1.91
  -2   1  -7   -0.38    1.89
   2   1   7    1.83    1.74
  -3  -1  -6   22.50    2.24
   3  -1   6   23.58    1.98
  -3   1  -6   23.13    2.23
   3   1   6   25.48    2.01
  -4  -1  -5    2.48    1.59
   4  -1   5    2.62    1.45
  -4   1  -5    0.69    1.53
   5  -1   4   18.04    1.53
  -5  -1  -4   14.57    1.76
  -5   1  -4   11.20    1.79
  -6  -1  -3   19.26    1.68
   6  -1   3   18.57    1.37
  -6   1  -3   24.68    1.93
  -7  -1  -2    3.44    1.13
   7  -1   2    2.77    0.80
  -7   1  -2    4.80    1.29
   8  -1   1   49.91    2.12
  -8  -1  -1   49.42    2.20
  -8   1  -1   46.02    2.30
  -9  -1   0    0.38    0.82
  -9   1   0    2.83    0.93
  10   1  -1   87.03    2.95
   0  -2   9    6.55    2.26
   0  -2  -9    3.14    3.01
   0   2  -9    2.24    2.79
  -1  -2  -8    4.84    2.43
   1  -2   8    6.40    1.92
  -1   2  -8    8.14    2.37
  -2  -2  -7    2.36    2.06
   2  -2   7    7.88    1.76
  -2   2  -7    5.23    1.95
  -3  -2  -6    0.02    1.73
   3  -2   6    3.16    1.60
  -3   2  -6    1.92    1.71
  -4  -2  -5    0.88    1.54
   4  -2   5    0.52    1.46
  -4   2  -5   -1.16    1.55
   5  -2   4    4.63    1.32
  -5  -2  -4    7.90    1.53
  -5   2  -4    5.81    1.59
   6  -2   3    9.44    1.20
  -6  -2  -3    8.81    1.40
  -6   2  -3    7.75    1.58
   7  -2   2    5.67    0.93
  -7  -2  -2    5.08    1.16
  -7   2  -2    5.21    1.38
   8  -2   1   23.37    1.45
  -8  -2  -1   24.39    1.67
  -8   2  -1   25.65    1.71
  -9  -2   0   12.90    1.12
   9  -2   0   15.27    1.12
  -9   2   0   12.91    1.31
  10  -2  -1   84.58    3.12
  10   2  -1   92.82    3.02
  11  -2  -2    0.27    1.12
   0  -3   9    4.23    2.13
   0  -3  -9    2.44    3.24
   0   3  -9    2.68    2.87
  -1  -3  -8    8.32    2.72
   1  -3   8    9.04    2.00
  -1   3  -8    9.20    2.55
  -2  -3  -7   10.77    2.32
   2  -3   7   10.32    1.95
  -2   3  -7    5.33    2.17
  -3  -3  -6   22.78    2.35
   3  -3   6   23.83    2.17
  -3   3  -6   20.11    2.29
   4  -3   5   12.21    1.74
  -4  -3  -5    7.65    1.78
  -4   3  -5    8.85    1.85
   5  -3   4   11.93    1.52
  -5  -3  -4    8.08    1.51
  -5   3  -4    8.77    1.75
  -6  -3  -3    7.13    1.30
   6  -3   3    7.76    1.20
  -6   3  -3    7.63    1.60
   7  -3   2    1.38    0.87
  -7  -3  -2   -0.74    1.05
  -7   3  -2    0.36    1.33
   8  -3   1   50.26    2.14
  -8  -3  -1   52.51    2.27
  -8   3  -1   54.95    2.66
   9  -3   0    4.83    0.93
  -9  -3   0    5.03    0.93
  -9   3   0    4.38    1.17
   9   3   0    4.90    0.89
  10  -3  -1   73.73    2.76
  10   3  -1   70.71    2.60
  11  -3  -2    3.05    1.11
  12  -3  -3   60.09    2.81
  13  -3  -4    6.40    2.00
   0  -4  -9    5.35    3.60
   0  -4   9    5.55    2.33
   0   4  -9    2.52    3.10
   1  -4   8    3.15    2.06
  -1  -4  -8   -1.41    2.73
  -1   4  -8    3.54    2.58
   2  -4   7    4.25    1.94
  -2  -4  -7    0.79    2.22
  -2   4  -7    1.47    2.10
   3  -4   6    3.56    1.75
  -3  -4  -6    6.32    1.98
  -3   4  -6    5.98    2.09
  -4  -4  -5    4.35    1.68
   4  -4   5    3.83    1.62
  -4   4  -5    4.69    1.85
   5  -4   4    7.36    1.51
  -5  -4  -4    7.66    1.58
  -5   4  -4    9.86    1.85
   6  -4   3   14.35    1.40
  -6  -4  -3   15.26    1.53
  -6   4  -3   12.44    1.82
   7  -4   2    6.33    1.04
  -7  -4  -2    9.40    1.17
  -7   4  -2    6.66    1.58
  -8  -4  -1   45.39    2.16
   8  -4   1   49.77    2.11
  -8   4  -1   48.52    2.65
   9  -4   0    3.14    0.92
   9   4   0    2.28    0.86
  10  -4  -1   10.94    1.17
  10   4  -1   12.08    1.08
  11  -4  -2   10.05    1.22
  11   4  -2    9.35    1.09
  12  -4  -3   42.15    2.46
  13  -4  -4    0.97    1.52
  14  -4  -5    1.60    1.92
   0  -5   9   16.69    3.09
   0   5  -9   18.35    4.37
   1  -5   8   16.95    2.43
  -1  -5  -8   19.46    3.31
  -1   5  -8   12.41    2.92
  -2  -5  -7    1.35    2.35
   2  -5   7    4.13    2.03
  -2   5  -7    3.19    2.24
   3  -5   6    6.97    1.93
  -3  -5  -6    7.80    2.15
  -3   5  -6    8.10    2.13
  -4  -5  -5    1.96    1.66
   4  -5   5    2.62    1.66
  -4   5  -5    3.87    1.84
   5  -5   4    9.06    1.65
  -5  -5  -4    8.53    1.51
  -5   5  -4   10.73    1.98
   6  -5   3   24.52    1.72
  -6  -5  -3   22.25    1.71
  -6   5  -3   25.80    2.23
   7  -5   2    5.86    1.12
  -7  -5  -2    4.69    1.08
  -7   5  -2    4.61    1.63
   8  -5   1   31.79    1.81
   8   5   1   28.75    1.80
  -8   5  -1   32.09    2.18
   9  -5   0    7.64    1.07
   9   5   0    7.86    1.03
  10  -5  -1   44.29    2.18
  10   5  -1   44.22    2.03
  11  -5  -2    9.01    1.24
  11   5  -2    7.76    1.12
  12  -5  -3   52.99    2.72
  13  -5  -4    0.72    1.52
  14  -5  -5   21.86    2.36
  15  -5  -6    4.87    2.72
  -1  -6  -8    7.40    3.33
   1  -6   8    5.95    2.35
  -1   6  -8    4.09    3.03
   2  -6   7    5.82    2.14
  -2  -6  -7    7.59    2.67
  -2   6  -7    4.89    2.44
  -3  -6  -6    4.38    2.06
   3  -6   6    3.92    1.98
  -3   6  -6    2.92    2.17
  -4  -6  -5    1.87    1.63
   4  -6   5    0.62    1.78
  -4   6  -5    2.31    2.04
   5  -6   4    6.03    1.63
  -5  -6  -4    6.08    1.48
  -5   6  -4    4.81    1.95
   6  -6   3    8.03    1.42
  -6  -6  -3    9.83    1.36
  -6   6  -3    6.29    1.90
   7  -6   2   14.53    1.39
  -7  -6  -2   10.36    1.33
  -7   6  -2   13.56    1.98
   7   6   2   14.80    1.38
   8  -6   1   16.48    1.38
  -8   6  -1   16.00    1.95
   8   6   1   15.55    1.33
   9  -6   0    8.26    1.12
   9   6   0    4.80    1.02
  10  -6  -1   53.40    2.44
  10   6  -1   54.92    2.33
  11  -6  -2    5.07    1.21
  11   6  -2    3.17    1.08
  12  -6  -3    2.33    1.32
  13  -6  -4    3.78    1.51
  14  -6  -5    7.78    2.01
  -1  -7  -8   -0.25    3.58
   1  -7   8    4.75    2.40
  -1   7  -8    1.49    3.09
   2  -7   7   17.22    2.53
  -2  -7  -7   10.97    2.91
  -2   7  -7   13.80    2.86
  -3  -7  -6   22.91    2.51
   3  -7   6   20.94    2.49
  -3   7  -6   12.84    2.56
  -4  -7  -5   15.43    1.94
   4  -7   5   12.45    2.10
  -4   7  -5   10.14    2.35
  -5  -7  -4    3.63    1.46
   5  -7   4    5.78    1.67
  -5   7  -4    3.82    2.07
   6  -7   3    2.69    1.31
  -6   7  -3    2.39    2.04
   6   7   3    0.98    1.18
   7  -7   2    2.32    1.23
  -7   7  -2    4.08    1.96
   7   7   2    3.89    1.16
   8  -7   1   30.95    2.01
   8   7   1   30.94    1.95
  -8   7  -1   24.79    2.46
   9  -7   0    8.37    1.22
   9   7   0    8.31    1.19
  10  -7  -1   36.66    2.16
  10   7  -1   36.30    2.04
  11  -7  -2    9.97    1.38
  11   7  -2   11.71    1.37
  12  -7  -3   23.14    1.90
  13  -7  -4    5.67    1.65
  14  -7  -5   22.72    2.41
  -2  -8  -7   -0.10    2.91
   2  -8   7   -1.17    2.35
  -2   8  -7    2.56    2.90
  -3  -8  -6    3.73    2.26
   3  -8   6    8.41    2.44
  -3   8  -6    7.16    2.62
   4  -8   5    8.62    2.17
  -4  -8  -5    9.31    1.89
  -4   8  -5    3.37    2.37
   4   8   5    2.79    1.89
   5  -8   4   18.13    2.03
   5   8   4   15.96    1.84
  -5   8  -4   17.46    2.54
   6  -8   3    6.55    1.49
  -6   8  -3    8.33    2.22
   6   8   3    4.81    1.34
   7  -8   2    8.11    1.40
  -7   8  -2    4.36    2.19
   7   8   2    6.86    1.28
   8  -8   1   24.98    1.77
   8   8   1   24.85    1.74
   9  -8   0    8.05    1.28
   9   8   0   10.54    1.32
  10  -8  -1    5.75    1.29
  10   8  -1    6.61    1.26
  11  -8  -2    5.66    1.38
  11   8  -2    4.22    1.32
  12  -8  -3   26.72    2.05
  12   8  -3   26.62    1.97
  13  -8  -4    0.56    1.63
   2  -9   7    0.81    2.73
   2   9   7    1.75    2.90
  -2   9  -7    5.92    3.38
   3  -9   6    3.40    2.56
   3   9   6    0.75    2.39
  -3   9  -6   -1.98    2.73
   4  -9   5    6.90    2.30
  -4   9  -5    9.18    2.75
   4   9   5    7.61    2.09
   5  -9   4    5.01    1.87
  -5   9  -4    6.16    2.59
   5   9   4    4.05    1.77
   6  -9   3   21.80    1.95
   6   9   3   16.92    1.84
  -6   9  -3   18.63    2.65
   7  -9   2    5.07    1.42
   7   9   2    9.18    1.48
  -7   9  -2    4.99    2.41
   8  -9   1    9.97    1.44
   8   9   1    8.29    1.38
   9  -9   0   13.71    1.56
   9   9   0   21.64    1.72
  10  -9  -1   17.45    1.69
  10   9  -1   17.15    1.62
  11  -9  -2    5.81    1.53
  11   9  -2   10.20    1.57
  12  -9  -3   23.61    2.04
  12   9  -3   20.19    1.94
  13  -9  -4    4.48    1.88
   2  10   7    3.74    3.23
   3 -10   6    3.97    2.90
   3  10   6    5.27    2.76
  -3  10  -6    4.24    3.18
   4 -10   5   -1.91    2.26
   4  10   5    1.95    2.33
  -4  10  -5    2.14    2.83
   5 -10   4    5.97    2.05
  -5  10  -4    6.95    2.76
   5  10   4    6.84    2.07
   6 -10   3    6.58    1.76
   6  10   3    9.17    1.88
  -6  10  -3    7.75    2.69
   7 -10   2   15.14    1.83
  -7  10  -2   10.54    3.21
   7  10   2   16.45    1.77
   8 -10   1    8.09    1.57
   8  10   1    7.57    1.55
   9 -10   0    4.59    1.44
   9  10   0    2.62    1.40
  10 -10  -1   24.58    1.99
  10  10  -1   25.23    1.97
  11 -10  -2    2.18    1.57
  11  10  -2    4.05    1.59
  12 -10  -3    2.26    1.71
  12  10  -3    2.21    1.87
   3  11   6    2.33    3.09
   4 -11   5    9.21    2.82
   4  11   5   11.62    2.80
  -4  11  -5   12.79    3.40
   5 -11   4    4.53    2.24
   5  11   4    2.66    2.29
  -5  11  -4   -1.21    2.83
   6 -11   3    0.93    1.83
  -6  11  -3    0.32    2.85
   6  11   3    1.11    1.91
   7 -11   2    5.53    1.80
   7  11   2    5.48    1.70
   8 -11   1   13.89    1.82
   8  11   1   10.22    1.76
   9 -11   0    5.72    1.63
   9  11   0    5.75    1.69
  10 -11  -1   10.90    1.81
  10  11  -1   12.45    1.83
  11 -11  -2   13.27    1.96
  11  11  -2   14.74    1.97
  12  11  -3    6.09    2.14
   5 -12   4   16.79    2.89
  -5  12  -4   12.10    3.57
   5  12   4   15.81    2.72
   6 -12   3    2.68    2.21
   6  12   3    1.91    2.33
  -6  12  -3    6.41    3.34
   7 -12   2    2.89    1.95
   7  12   2    7.75    2.14
   8 -12   1    8.35    1.90
   8  12   1    8.56    1.97
   9 -12   0    5.65    1.91
   9  12   0    4.94    1.84
  10 -12  -1    4.55    1.91
  10  12  -1    4.90    1.88
  -1   0  -9   -0.80    2.84
  -2   0  -8    6.80    2.46
  -3   0  -7    4.12    2.05
  -4   0  -6   26.20    2.39
  -5   0  -5    2.36    1.65
  -6   0  -4   17.48    1.96
  -7   0  -3    3.13    1.43
  -8   0  -2   61.41    2.91
  -9   0  -1    1.62    1.14
 -10   0   0    0.61    1.06
  -1  -1  -9    7.32    2.95
   1  -1   9    9.23    2.48
  -1   1  -9    4.60    2.95
   2  -1   8   14.42    2.21
  -2  -1  -8   13.34    2.56
  -2   1  -8   10.53    2.54
  -3  -1  -7    9.02    2.16
   3  -1   7   12.29    1.96
  -3   1  -7    8.97    2.20
   4  -1   6   21.37    2.08
  -4  -1  -6   18.07    2.17
  -4   1  -6   18.16    2.20
   5  -1   5   19.02    2.52
  -5  -1  -5   22.30    2.11
  -5   1  -5   19.01    2.08
  -6  -1  -4   16.78    1.91
  -6   1  -4   18.70    2.11
  -7  -1  -3   26.20    1.97
  -7   1  -3   25.97    2.13
  -8  -1  -2   13.31    1.50
  -8   1  -2   12.91    1.56
  -9  -1  -1    8.68    1.30
  -9   1  -1    9.81    1.39
 -10  -1   0    8.08    1.16
 -10   1   0    9.73    1.33
   1  -2   9    1.63    2.25
  -1  -2  -9    0.65    3.01
  -1   2  -9    1.42    2.92
  -2  -2  -8    8.54    2.70
   2  -2   8    9.59    2.15
  -2   2  -8    5.43    2.40
  -3  -2  -7    4.10    2.24
   3  -2   7    6.41    1.95
  -3   2  -7    4.14    2.05
  -4  -2  -6   17.68    2.27
   4  -2   6   18.63    2.08
  -4   2  -6   16.01    2.16
  -5  -2  -5    2.55    1.80
   5  -2   5    2.05    1.61
  -5   2  -5    2.62    1.74
   6  -2   4   53.71    2.81
  -6  -2  -4   59.16    3.10
  -6   2  -4   58.16    3.25
   7  -2   3    1.88    1.20
  -7  -2  -3    2.68    1.36
  -7   2  -3    1.61    1.55
  -8  -2  -2    5.31    1.32
  -8   2  -2    6.49    1.56
  -9  -2  -1    4.50    1.16
  -9   2  -1    5.90    1.37
 -10  -2   0   16.82    1.37
  11   2  -1    1.82    1.43
   1  -3   9    6.86    2.49
  -1  -3  -9    7.21    3.42
  -1   3  -9    7.51    3.24
   2  -3   8   12.79    2.30
  -2  -3  -8   14.20    2.95
  -2   3  -8    9.40    2.72
  -3  -3  -7    5.26    2.31
   3  -3   7    3.78    1.97
  -3   3  -7    2.25    2.04
  -4  -3  -6   13.42    2.23
   4  -3   6   16.76    2.12
  -4   3  -6   11.68    2.12
   5  -3   5   17.35    1.93
  -5  -3  -5   16.67    2.04
  -5   3  -5   10.65    1.94
  -6  -3  -4   19.77    1.93
   6  -3   4   17.70    1.76
  -6   3  -4   22.01    2.15
   7  -3   3   16.42    1.53
  -7  -3  -3   16.22    1.76
  -7   3  -3   26.48    2.14
   8  -3   2    9.64    1.22
  -8  -3  -2    8.19    1.32
  -8   3  -2    5.73    1.60
  -9  -3  -1   12.14    1.32
   9  -3   1   13.53    1.25
  -9   3  -1   12.57    1.62
  10  -3   0    4.80    1.22
  10   3   0    5.10    1.06
  11   3  -1    1.18    1.00
   1  -4   9    4.10    2.54
  -1  -4  -9    0.43    3.70
   2  -4   8    2.96    2.26
  -2  -4  -8    3.93    3.01
  -2   4  -8    3.21    2.71
   3  -4   7    3.39    2.03
  -3  -4  -7    1.34    2.47
  -3   4  -7    0.44    2.16
   4  -4   6   21.27    2.24
  -4  -4  -6   20.31    2.44
  -4   4  -6   20.04    2.38
   5  -4   5    2.73    1.73
  -5  -4  -5    3.23    1.75
  -5   4  -5    6.21    1.99
  -6  -4  -4   17.69    1.96
   6  -4   4   15.61    1.80
  -6   4  -4   13.51    2.10
   7  -4   3    2.69    1.29
  -7  -4  -3    5.64    1.45
  -7   4  -3    0.70    1.74
   8  -4   2   44.24    2.26
  -8  -4  -2   42.78    2.42
  -8   4  -2   50.13    2.97
   9  -4   1    4.27    1.09
  -9  -4  -1    3.37    1.16
  -9   4  -1    3.60    1.56
  10  -4   0   -0.42    1.04
  10   4   0   -1.77    0.93
  11  -4  -1   10.70    1.33
  11   4  -1   10.82    1.24
  12  -4  -2    2.89    1.39
  -1  -5  -9    3.10    4.20
   2  -5   8    6.70    2.34
  -2  -5  -8    7.54    3.24
  -2   5  -8    4.88    2.81
   3  -5   7    8.64    2.24
  -3  -5  -7    6.55    2.66
  -3   5  -7    9.13    2.49
  -4  -5  -6   17.84    2.48
   4  -5   6   18.66    2.27
  -4   5  -6   19.88    2.46
   5  -5   5   10.47    2.03
  -5  -5  -5   15.47    2.14
  -5   5  -5   10.72    2.13
  -6  -5  -4   10.15    1.64
   6  -5   4   11.80    1.79
  -6   5  -4   10.79    2.09
  -7  -5  -3   13.55    1.60
   7  -5   3   15.21    1.61
  -7   5  -3   16.38    2.25
  -8  -5  -2    9.57    1.36
   8  -5   2   10.08    1.37
  -8   5  -2    9.48    1.89
   9  -5   1    1.20    1.11
   9   5   1    0.74    1.05
  -9   5  -1    0.93    1.67
  10  -5   0    9.37    1.30
  10   5   0    9.86    1.24
  11  -5  -1    3.07    1.25
  11   5  -1    2.66    1.11
  12  -5  -2    3.12    1.31
  13  -5  -3    9.06    1.66
   2  -6   8    4.15    2.49
  -2  -6  -8    2.66    3.42
  -2   6  -8    3.16    2.99
   3  -6   7    3.05    2.18
  -3  -6  -7    4.73    2.80
  -3   6  -7    5.02    2.49
   4  -6   6   12.65    2.38
  -4  -6  -6   11.83    2.37
  -4   6  -6    7.97    2.38
  -5  -6  -5    7.08    1.94
   5  -6   5    4.82    1.98
  -5   6  -5    3.37    2.08
   6  -6   4   34.25    2.42
  -6  -6  -4   29.46    2.30
  -6   6  -4   33.50    2.68
   7  -6   3    6.81    1.54
  -7  -6  -3    6.34    1.48
  -7   6  -3    5.25    2.07
   8  -6   2    2.66    1.34
  -8   6  -2    0.47    1.83
   8   6   2    1.69    1.16
   9  -6   1    9.55    1.32
   9   6   1    5.90    1.25
  10  -6   0   15.89    1.51
  10   6   0   16.16    1.43
  11  -6  -1    6.34    1.36
  11   6  -1    8.24    1.29
  12  -6  -2    2.94    1.37
  12   6  -2    4.11    1.36
  13  -6  -3   12.61    1.85
  14  -6  -4    6.59    1.93
  -2  -7  -8    7.86    3.88
   3  -7   7    4.47    2.57
  -3  -7  -7    2.32    2.98
  -3   7  -7    3.57    2.78
  -4  -7  -6    3.75    2.37
   4  -7   6    6.17    2.43
  -4   7  -6    5.68    2.45
  -5  -7  -5   11.37    2.07
   5  -7   5   10.59    2.27
  -5   7  -5    8.47    2.37
   6  -7   4   16.99    2.09
  -6  -7  -4   15.20    1.86
  -6   7  -4   13.85    2.43
   7  -7   3   11.55    1.72
   7   7   3   11.92    1.57
  -7   7  -3   12.73    2.29
   8  -7   2    8.23    1.52
  -8   7  -2    7.72    2.18
   8   7   2    6.99    1.35
   9  -7   1   11.22    1.48
   9   7   1   12.32    1.44
  10  -7   0    1.53    1.24
  10   7   0    2.62    1.22
  11  -7  -1    6.12    1.41
  11   7  -1    6.54    1.35
  12  -7  -2    7.93    1.52
  12   7  -2    8.90    1.49
  13  -7  -3    2.03    1.69
  14  -7  -4    5.36    2.00
  -3  -8  -7    3.52    3.18
   3  -8   7    0.20    2.71
  -3   8  -7    2.80    2.96
   4  -8   6   13.29    2.73
  -4  -8  -6    8.81    2.54
  -4   8  -6    9.71    2.90
  -5  -8  -5    0.91    1.92
   5  -8   5    0.43    2.25
  -5   8  -5    3.13    2.47
   5   8   5    3.37    2.03
   6  -8   4    8.09    2.01
  -6   8  -4    5.47    2.50
   6   8   4    5.71    1.81
   7  -8   3   10.59    1.84
  -7   8  -3    9.49    2.48
   7   8   3   10.15    1.60
   8  -8   2   35.89    2.28
  -8   8  -2   30.11    2.82
   8   8   2   31.62    2.11
   9  -8   1   13.89    1.64
   9   8   1   11.71    1.54
  10  -8   0    1.26    1.34
  10   8   0    0.41    1.28
  11  -8  -1    9.68    1.59
  11   8  -1   10.93    1.57
  12  -8  -2    5.40    1.59
  12   8  -2    6.97    1.61
  13  -8  -3    4.18    1.78
  14  -8  -4    1.21    1.98
   3   9   7    2.70    3.06
   4  -9   6    8.88    2.83
   4   9   6   10.96    2.71
  -4   9  -6    7.58    3.07
   5  -9   5   11.03    2.56
  -5   9  -5    8.55    2.94
   5   9   5    6.28    2.24
   6  -9   4    2.48    2.03
  -6   9  -4    2.42    2.71
   6   9   4    5.95    1.93
   7  -9   3    7.44    1.88
  -7   9  -3    7.05    2.77
   7   9   3    5.64    1.71
   8  -9   2    7.49    1.79
   8   9   2    4.19    1.58
   9  -9   1   -1.53    1.38
   9   9   1   -0.01    1.39
  10  -9   0    6.66    1.58
  10   9   0    8.67    1.64
  11  -9  -1    5.66    1.61
  11   9  -1    6.55    1.62
  12  -9  -2    0.14    1.59
  12   9  -2    2.76    1.76
  13  -9  -3   13.62    2.11
  -4  10  -6    2.65    5.52
   4  10   6    2.67    2.88
   5 -10   5    3.36    2.60
  -5  10  -5   -0.16    3.07
   5  10   5    3.62    2.53
   6 -10   4   13.26    2.47
   6  10   4   19.81    2.51
  -6  10  -4   16.62    3.20
   7 -10   3    5.67    2.01
   7  10   3    4.04    1.89
  -7  10  -3    5.97    2.93
   8 -10   2    0.37    1.75
   8  10   2   -0.21    1.60
   9 -10   1    9.57    1.74
   9  10   1    8.76    1.73
  10 -10   0   14.34    1.94
  10  10   0   17.87    1.94
  11 -10  -1    9.56    1.87
  11  10  -1    9.65    1.86
  12 -10  -2    2.36    1.81
  12  10  -2    1.31    1.86
  -5  11  -5    5.08    3.66
   6 -11   4    8.83    2.61
  -6  11  -4    7.52    3.48
   6  11   4    8.70    2.61
   7 -11   3    4.60    2.19
   7  11   3    3.85    2.20
   8 -11   2    3.20    1.97
   8  11   2    4.81    1.97
   9 -11   1    4.37    1.92
   9  11   1    6.53    1.96
  10 -11   0    1.62    1.76
  10  11   0    1.87    1.85
  11 -11  -1    8.26    2.01
  11  11  -1   10.14    2.06
  -6  12  -4   -0.28    3.88
   8 -12   2   11.52    3.14
   9 -12   1    8.48    2.76
  -3   0  -8    5.46    2.57
  -4   0  -7    2.47    2.19
  -5   0  -6    2.76    1.89
  -6   0  -5   16.69    2.17
  -7   0  -4    3.15    1.77
  -8   0  -3   26.64    2.22
  -9   0  -2    1.86    1.46
 -10   0  -1   34.32    2.36
 -11   0   0    2.85    1.67
  -3  -1  -8   10.42    2.63
  -3   1  -8    5.72    2.68
  -4  -1  -7    4.55    2.30
  -4   1  -7    3.51    2.15
  -5  -1  -6   10.07    2.10
  -5   1  -6    8.28    2.01
  -6  -1  -5   18.29    2.25
  -6   1  -5   16.56    2.19
  -7  -1  -4    2.05    1.66
  -7   1  -4    1.54    1.74
  -8  -1  -3   34.50    2.37
  -8   1  -3   36.18    2.44
  -9  -1  -2    2.89    1.46
  -9   1  -2    5.76    1.58
 -10  -1  -1   41.56    2.41
 -10   1  -1   38.41    2.52
 -11  -1   0    4.35    1.30
  -3  -2  -8   -2.08    2.61
  -3   2  -8    0.30    2.52
  -4  -2  -7   -0.19    2.29
  -4   2  -7   -0.02    2.11
  -5  -2  -6    3.48    2.13
  -5   2  -6    7.99    2.07
  -6  -2  -5    5.73    1.92
  -6   2  -5    6.85    1.96
  -7  -2  -4    3.13    1.68
  -7   2  -4    5.56    1.91
  -8  -2  -3   32.45    2.29
  -8   2  -3   29.34    2.42
  -9  -2  -2    7.25    1.51
  -9   2  -2    3.41    1.60
 -10  -2  -1   49.96    2.60
 -10   2  -1   47.46    2.82
 -11  -2   0   -0.34    1.21
   2  -3   9    1.50    2.88
   3  -3   8   13.17    2.51
  -3  -3  -8   13.97    3.03
  -3   3  -8    9.65    2.79
  -4  -3  -7    9.44    2.52
   4  -3   7   11.09    2.27
  -4   3  -7    8.81    2.41
  -5  -3  -6   10.96    2.29
   5  -3   6    6.78    2.03
  -5   3  -6    8.27    2.13
   6  -3   5   17.00    2.58
  -6  -3  -5   10.70    2.04
  -6   3  -5   12.37    2.13
  -7  -3  -4    2.83    1.69
  -7   3  -4    1.62    1.84
  -8  -3  -3   28.82    2.21
  -8   3  -3   33.99    2.56
  -9  -3  -2    5.72    1.46
  -9   3  -2    5.27    1.80
 -10  -3  -1   35.30    2.31
  11   3   0    1.79    1.23
   3  -4   8    5.93    2.50
  -3  -4  -8    3.08    3.04
  -3   4  -8    6.61    2.77
   4  -4   7    0.01    2.10
  -4  -4  -7   -0.64    2.57
  -4   4  -7    1.22    2.33
  -5  -4  -6    2.36    2.27
   5  -4   6    4.09    2.09
  -5   4  -6    2.88    2.13
  -6  -4  -5    7.26    2.00
   6  -4   5   13.85    2.18
  -6   4  -5   12.31    2.23
  -7  -4  -4    6.56    1.83
   7  -4   4    6.37    1.76
  -7   4  -4    4.54    1.91
  -8  -4  -3   20.63    1.90
   8  -4   3   19.59    1.78
  -8   4  -3   23.61    2.36
  -9  -4  -2    0.26    1.38
   9  -4   2    2.31    1.65
  -9   4  -2    2.86    1.84
 -10  -4  -1   18.46    1.68
  10   4   1   20.41    1.66
  11   4   0    4.48    1.31
   3  -5   8    7.97    2.61
  -3  -5  -8   13.78    3.52
  -4  -5  -7    3.38    2.74
   4  -5   7    0.17    2.34
  -4   5  -7    2.83    2.44
  -5  -5  -6    3.78    2.37
   5  -5   6    3.53    2.22
  -5   5  -6    4.77    2.29
  -6  -5  -5   18.66    2.33
   6  -5   5   17.24    2.35
  -6   5  -5   19.78    2.46
   7  -5   4    4.78    1.81
  -7  -5  -4    7.80    1.77
  -7   5  -4    8.69    2.20
   8  -5   3   19.41    1.85
  -8  -5  -3   14.97    1.77
  -8   5  -3   18.24    2.31
  -9  -5  -2    2.62    1.47
   9  -5   2    4.38    1.48
  -9   5  -2    7.51    2.06
  10  -5   1   28.31    1.89
  10   5   1   30.40    1.98
  11  -5   0    8.32    1.49
  11   5   0    7.50    1.42
  12   5  -1   23.20    1.75
   3  -6   8    2.23    3.16
  -4  -6  -7    1.08    2.92
   4  -6   7   -0.63    2.39
  -4   6  -7    1.03    2.61
   5  -6   6    3.24    2.32
  -5  -6  -6    6.70    2.56
  -5   6  -6    7.73    2.57
  -6  -6  -5    4.56    2.05
   6  -6   5    2.94    2.13
  -6   6  -5    2.13    2.26
  -7  -6  -4    5.00    1.82
   7  -6   4    3.86    1.86
  -7   6  -4    7.41    2.32
  -8  -6  -3   15.17    1.85
   8  -6   3   18.31    2.01
  -8   6  -3   19.68    2.57
   9  -6   2    2.77    1.55
   9   6   2    3.04    1.39
  -9   6  -2    1.49    2.16
  10  -6   1   29.63    2.03
  10   6   1   34.11    2.10
  11  -6   0    0.22    1.37
  11   6   0    0.58    1.38
  12  -6  -1    1.60    1.43
  12   6  -1    1.70    1.42
   4  -7   7    7.25    2.73
  -4  -7  -7   12.61    3.37
  -4   7  -7    6.36    3.00
  -5  -7  -6    8.98    2.83
   5  -7   6    7.97    2.53
  -5   7  -6    9.79    2.81
  -6  -7  -5    3.72    2.18
   6  -7   5    4.48    2.27
  -6   7  -5    6.66    2.54
  -7  -7  -4   -0.63    1.71
   7  -7   4    0.26    1.88
   7   7   4   -0.28    1.58
  -7   7  -4    0.52    2.40
   8  -7   3   19.59    2.13
  -8   7  -3   16.00    2.64
   8   7   3   13.62    1.82
   9  -7   2   11.03    1.83
   9   7   2    9.11    1.59
  10  -7   1   19.18    1.84
  10   7   1   20.80    1.83
  11  -7   0    4.99    1.53
  11   7   0    6.43    1.54
  12  -7  -1   12.48    1.81
  12   7  -1   15.23    1.80
  13  -7  -2    5.10    1.68
  14  -7  -3    6.33    3.18
  -5  -8  -6    4.82    2.72
   5  -8   6    4.35    2.73
   5   8   6    3.15    2.42
  -5   8  -6    4.59    2.94
   6  -8   5    4.73    2.41
   6   8   5    2.59    2.15
  -6   8  -5    4.63    2.74
   7  -8   4    0.58    2.02
   7   8   4    0.81    1.79
  -7   8  -4    2.96    2.58
   8  -8   3   10.29    2.04
  -8   8  -3   11.98    2.79
   8   8   3   10.22    1.85
   9  -8   2   -0.06    1.69
   9   8   2    2.39    1.57
  10  -8   1    8.40    1.68
  10   8   1    8.51    1.67
  11  -8   0    1.77    1.54
  11   8   0    1.29    1.51
  12  -8  -1   19.04    2.05
  12   8  -1   23.43    2.13
  13  -8  -2    3.77    1.83
  14  -8  -3    1.39    2.11
   5  -9   6    2.48    3.10
   5   9   6   13.37    4.22
  -5   9  -6    6.23    3.98
   6  -9   5    9.43    2.68
  -6   9  -5    6.50    3.05
   6   9   5   11.48    2.60
   7  -9   4    4.73    2.30
  -7   9  -4    4.98    2.85
   7   9   4    5.46    2.09
   8  -9   3    4.80    2.04
   8   9   3    5.37    1.85
  -8   9  -3    5.36    2.89
   9  -9   2    6.09    1.90
   9   9   2    6.77    1.84
  10  -9   1   13.48    1.92
  10   9   1   13.20    1.91
  11  -9   0    9.13    1.86
  11   9   0    9.03    1.88
  12  -9  -1    8.55    1.90
  12   9  -1    6.65    1.98
  13  -9  -2    1.11    1.95
  13   9  -2    3.45    2.65
   6 -10   5    1.71    3.11
  -6  10  -5   -0.56    3.32
   7 -10   4    6.92    2.64
   7  10   4    2.94    2.38
  -7  10  -4    4.00    3.24
   8 -10   3    9.29    2.39
   8  10   3    4.80    2.12
   9 -10   2   -0.81    1.96
   9  10   2    1.33    1.96
  10 -10   1   13.94    2.09
  10  10   1   13.38    2.17
  11 -10   0    1.18    1.85
  11  10   0    4.03    2.04
  12 -10  -1   -0.22    1.97
  12  10  -1   -1.12    2.06
  -7  11  -4    2.45    3.61
   8 -11   3    8.23    3.22
   9 -11   2    7.29    2.43
  10 -11   1    5.98    2.22
  -4   0  -8    2.32    2.80
  -5   0  -7    4.47    2.33
  -6   0  -6    2.22    2.04
  -7   0  -5    7.62    2.15
  -8   0  -4    2.81    1.88
  -9   0  -3   -1.90    1.75
 -10   0  -2   16.36    1.98
 -11   0  -1    5.34    1.68
  -4  -1  -8    3.35    2.84
  -4   1  -8    5.57    2.79
  -5  -1  -7    7.81    2.56
  -5   1  -7    9.12    2.45
  -6  -1  -6    0.51    2.10
  -6   1  -6    1.23    2.21
  -7  -1  -5    6.75    2.08
  -7   1  -5    9.51    2.19
  -8  -1  -4    1.27    1.84
  -8   1  -4    1.01    1.83
  -9  -1  -3    2.30    1.70
  -9   1  -3    0.43    1.86
 -10  -1  -2    6.26    1.77
 -10   1  -2    8.68    1.85
 -11  -1  -1    1.77    1.57
 -11   1  -1    1.74    1.71
  -4  -2  -8    4.11    3.01
  -4   2  -8    2.70    3.28
  -5  -2  -7    9.01    2.65
  -5   2  -7    9.55    2.51
  -6  -2  -6    5.70    2.19
  -6   2  -6    6.52    2.25
  -7  -2  -5    2.56    2.07
  -7   2  -5    2.79    2.17
  -8  -2  -4   -1.77    1.79
  -8   2  -4    2.59    2.08
  -9  -2  -3    6.77    1.87
  -9   2  -3    4.79    1.98
 -10  -2  -2    2.06    1.62
 -10   2  -2    1.16    1.87
 -11  -2  -1    1.18    1.51
  -5  -3  -7    1.62    2.65
  -5   3  -7    6.76    2.59
  -6  -3  -6    1.49    2.27
  -6   3  -6    3.00    2.15
  -7  -3  -5    8.44    2.28
  -7   3  -5    8.91    2.28
  -8  -3  -4    1.99    1.92
  -8   3  -4    5.44    2.27
  -9  -3  -3    7.69    1.82
  -9   3  -3    5.99    2.15
 -10  -3  -2    5.05    1.66
 -10   3  -2    4.85    1.97
 -11  -3  -1    2.29    1.50
  12   3   0   25.45    1.95
  -5  -4  -7    3.01    2.81
  -5   4  -7    1.66    2.46
  -6  -4  -6    4.22    2.49
  -6   4  -6    0.95    2.25
  -7  -4  -5    9.79    2.22
  -7   4  -5    6.14    2.42
  -8  -4  -4    5.82    1.91
  -8   4  -4    5.43    2.33
  -9  -4  -3    2.92    1.75
  -9   4  -3    1.12    2.20
 -10  -4  -2   10.46    1.79
 -10   4  -2    9.80    2.25
  11   4   1    8.72    1.62
  12   4   0    6.16    1.61
  -5  -5  -7    3.93    3.04
   5  -5   7    9.19    3.20
  -5   5  -7    8.93    2.76
  -6  -5  -6    2.02    2.48
   6  -5   6    2.70    2.97
  -6   5  -6    5.22    2.47
  -7  -5  -5    6.09    2.11
  -7   5  -5    6.58    2.38
  -8  -5  -4    1.69    1.85
  -8   5  -4    0.66    2.28
  -9  -5  -3    3.04    1.69
  -9   5  -3    1.32    2.27
 -10  -5  -2    5.67    1.70
  10   5   2    6.79    1.61
  11   5   1    3.97    1.62
  12   5   0   15.69    1.85
   5  -6   7    4.75    2.85
  -5  -6  -7    4.79    4.12
   6  -6   6    6.72    2.69
  -6  -6  -6    8.89    2.90
  -6   6  -6    5.61    2.69
   7  -6   5    1.98    2.28
  -7  -6  -5    1.97    2.23
  -7   6  -5    3.82    2.63
  -8  -6  -4    0.11    1.91
   8  -6   4    1.82    2.07
  -8   6  -4    2.46    2.39
   9  -6   3    7.75    2.05
  -9  -6  -3    7.29    1.88
   9   6   3    8.06    1.70
  -9   6  -3   10.10    2.63
  10   6   2    6.64    1.75
  11   6   1    5.33    1.70
  12   6   0   15.80    1.96
  -6  -7  -6    6.44    3.08
   6  -7   6    9.97    2.88
  -6   7  -6    7.90    3.07
   7  -7   5    8.24    2.62
  -7  -7  -5    3.79    2.43
  -7   7  -5    4.87    2.83
   8  -7   4    5.83    2.23
  -8  -7  -4    1.14    2.08
   8   7   4    3.35    1.87
  -8   7  -4    3.98    2.67
   9  -7   3    5.06    2.06
   9   7   3    4.21    1.74
  -9   7  -3    7.79    2.65
  10  -7   2    1.61    1.86
  10   7   2    3.90    1.71
  11  -7   1    4.22    1.73
  11   7   1    4.51    1.79
  12   7   0   14.41    2.04
  13   7  -1    3.68    2.25
   6  -8   6    2.26    3.03
   7  -8   5    6.08    2.77
   7   8   5    4.39    2.29
  -7   8  -5    7.00    3.05
   8  -8   4   11.80    2.56
  -8   8  -4   12.35    3.07
   8   8   4    4.76    2.11
   9  -8   3    8.40    2.37
   9   8   3    5.37    1.98
  10  -8   2    7.36    2.11
  10   8   2    6.75    1.92
  11  -8   1    4.41    1.90
  11   8   1    5.88    1.93
  12  -8   0    9.08    2.11
  12   8   0   11.64    2.11
  13   8  -1    0.76    2.17
   7  -9   5   -0.41    2.90
  -7   9  -5   -1.68    3.23
   8  -9   4    0.37    2.63
   8   9   4    2.28    2.44
  -8   9  -4    1.83    3.30
   9  -9   3    1.48    2.37
   9   9   3    0.05    2.01
  10  -9   2    5.39    2.14
  10   9   2    5.17    2.15
  11  -9   1    1.35    1.98
  11   9   1    4.19    2.14
  12  -9   0    6.41    2.25
  12   9   0    6.39    2.25
  13  -9  -1   10.45    2.27
  13   9  -1   11.27    2.54
   9 -10   3    9.53    2.86
  10 -10   2    6.94    2.34
  11 -10   1    4.11    2.29
  -6   0  -7   10.65    2.81
  -7   0  -6   -0.70    2.31
  -8   0  -5   13.58    2.51
  -9   0  -4   13.76    2.45
 -10   0  -3   19.23    2.45
 -11   0  -2    3.86    2.02
  -6  -1  -7    3.85    2.60
  -6   1  -7    3.55    2.57
  -7  -1  -6    4.99    2.45
  -7   1  -6    2.93    2.33
  -8  -1  -5    7.55    2.32
  -8   1  -5    7.53    2.43
  -9  -1  -4    7.03    2.22
  -9   1  -4    9.60    2.42
 -10  -1  -3   13.61    2.32
 -10   1  -3   15.19    2.39
 -11  -1  -2    6.55    2.00
 -11   1  -2    9.60    2.16
 -12  -1  -1    6.86    2.02
  -6  -2  -7    6.92    2.81
  -6   2  -7    5.36    2.77
  -7  -2  -6    6.55    2.45
  -7   2  -6    8.91    2.59
  -8  -2  -5   20.86    2.68
  -8   2  -5   23.60    2.83
  -9  -2  -4    1.68    2.18
  -9   2  -4    0.80    2.31
 -10  -2  -3   20.21    2.43
 -10   2  -3   19.15    2.62
 -11  -2  -2    7.78    2.00
 -11   2  -2    5.05    2.12
 -12  -2  -1    5.12    1.88
  -6  -3  -7    3.59    4.33
  -6   3  -7    6.44    3.64
  -7  -3  -6    2.21    2.43
  -7   3  -6    3.79    2.54
  -8  -3  -5    8.29    2.42
  -8   3  -5    8.57    2.68
  -9  -3  -4   10.38    2.30
  -9   3  -4    5.90    2.49
 -10  -3  -3   11.32    2.15
 -10   3  -3    7.05    2.39
 -11  -3  -2    3.38    1.93
 -12  -3  -1    7.68    2.00
  12   3   1   10.04    1.91
  -7  -4  -6    0.03    2.60
  -7   4  -6    1.96    2.58
  -8  -4  -5    4.98    2.40
  -8   4  -5   12.61    2.81
  -9  -4  -4    7.32    2.28
  -9   4  -4   10.09    2.78
 -10  -4  -3   13.12    2.19
 -10   4  -3   14.33    2.77
 -11  -4  -2    2.70    1.94
  12   4   1   14.94    2.07
  -7  -5  -6    4.63    2.76
  -7   5  -6    0.79    2.76
  -8  -5  -5    7.62    2.54
  -8   5  -5    8.24    2.79
  -9  -5  -4    0.76    2.10
  -9   5  -4    4.76    2.61
 -10  -5  -3    6.54    2.19
 -10   5  -3    9.16    2.80
  11   5   2    8.66    1.95
  12   5   1    7.86    1.99
  -7   6  -6   10.10    5.13
  -8  -6  -5   17.66    2.92
  -8   6  -5   15.67    3.03
  -9  -6  -4    1.55    2.35
  -9   6  -4    2.57    2.79
  10   6   3   13.17    2.01
  11   6   2    2.35    1.91
  12   6   1    1.51    2.03
  13   6   0    6.71    2.18
  -8   7  -5    4.04    3.05
   9   7   4    4.86    2.04
  -9   7  -4    4.36    3.10
  10   7   3    7.00    2.20
  11   7   2    0.82    2.06
  12   7   1    5.23    2.17
  13   7   0    5.37    2.40
   8  -8   5    1.67    3.31
  -9   8  -4    3.02    3.36
  10   8   3    3.14    2.52
  11   8   2    4.38    2.20
  12   8   1   13.87    2.49
  13   8   0    3.33    2.53
  10  -9   3    5.08    2.88
  11  -9   2    2.90    3.55
  -8   0  -6    1.86    2.78
  -9   0  -5    0.43    2.55
 -10   0  -4   15.14    2.80
 -11   0  -3    5.01    2.48
 -12   0  -2    4.49    2.38
  -8  -1  -6    0.19    2.71
  -8   1  -6   -0.04    2.67
  -9  -1  -5    0.35    2.52
  -9   1  -5    3.93    2.73
 -10  -1  -4    7.67    2.59
 -10   1  -4    7.88    2.70
 -11  -1  -3   -0.02    2.39
 -11   1  -3   -1.08    2.41
 -12  -1  -2   15.56    2.50
  -8  -2  -6    1.74    3.26
  -8   2  -6    3.27    2.70
  -9  -2  -5    5.73    2.68
  -9   2  -5    7.43    2.83
 -10  -2  -4   -2.14    2.52
 -10   2  -4    1.69    2.61
 -11  -2  -3    2.57    2.28
 -11   2  -3    3.10    2.64
 -12  -2  -2   27.98    2.77
  -8   3  -6    1.87    3.65
  -9  -3  -5    1.88    2.71
  -9   3  -5    0.03    2.68
 -10  -3  -4    4.32    2.49
 -10   3  -4    4.55    2.78
 -11  -3  -3    0.23    2.34
 -11   3  -3    0.46    2.74
 -12  -3  -2   13.22    2.49
  -9  -4  -5    2.06    2.68
  -9   4  -5    2.54    2.98
 -10  -4  -4   13.20    2.79
 -10   4  -4   16.45    3.10
 -11  -4  -3    3.02    2.43
 -12  -4  -2    4.65    2.34
  12   4   2    2.95    2.18
  13   4   1    3.40    2.93
  -9   5  -5   -0.30    3.12
 -10  -5  -4    6.31    2.58
 -10   5  -4    5.15    3.20
 -11  -5  -3    3.61    2.50
  11   5   3    0.99    2.04
  12   5   2    6.86    2.30
  13   5   1    3.74    2.43
 -10   6  -4    3.06    3.36
  11   6   3    3.03    2.21
  12   6   2   18.98    2.60
  13   6   1    4.79    2.61
 -11   0  -4    9.13    3.11
 -12   0  -3    2.09    2.98
 -11  -1  -4    2.37    2.98
 -11   1  -4    1.32    3.08
 -12  -1  -3    0.14    2.79
 -12   1  -3    1.21    3.01
 -11  -2  -4    2.76    2.91
 -11   2  -4    1.30    3.17
 -12  -2  -3    0.86    2.88
 -11  -3  -4    3.26    4.55
 -11   3  -4    0.63    3.33
 -12  -3  -3    4.40    2.86
 -13  -3  -2   -1.53    2.72
  13   3   2    1.00    2.82
 -11   4  -4    1.52    3.48
 -12  -4  -3    4.57    3.45
  13   4   2    1.01    2.73
   0   0   0    0.00    0.00
;
_shelx_hkl_checksum   41732
